# Supplementary material for: Phytophthora megakarya and P. palmivora, Causal Agents of Black Pod Rot, Induce Similar Plant Defense Responses Late during Infection of Susceptible Cacao Pods
Source: Front Plant Sci. 2017 Feb 14;8:169. doi: 10.3389/fpls.2017.00169 (PMC5306292; doi:10.3389/fpls.2017.00169)
Supplement: Supplementary file 4 [file DataSheet1.XLSX]

## Sheet: Sheet A
Supporting Excel file S1, Sheet A: RT-qPCR primers used in the study
Gene	Putative function	Forward primer	Reverse primer	Primer Efficiency (%)	Amplification factor [10^(-1/slop)]	±Gene Id	Reference
TcAlcDH	Alcohol dehydrogenase 2	CACGGACTGATCTCCCATCT	CCATGCTAATAATGCACCGTAA	100.83	2.0083	Tc01_g022950	In this study
TcAsp	Eukaryotic aspartyl protease family protein	CCAATGGAAAACAGCTTCCT	CTTCACGAGCAATTCCCAAG	102.967	2.02967	Tc08_g005780	In this study
TcCAD	( )-delta-cadinene synthase isozyme A	TGGCATTACTTCCTTGCTCA	GAAGGTGGTTTAGGCATGTTTT	108.855	2.08855	Tc07_g005340	In this study
TcCHD	Putative Cysteine and histidine-rich domain-containing protein 1	CTTTTGCTCGGATCATGGTT	ACCACATCCCTTGTTTTTGC	101.438	2.00144	Tc03_g018810	In this study
TcCHIA	Putative Acidic mammalian chitinase	GTCCAGGTGGAGGAGTTCAA	CCCAGAAGAAATAGCCACGA	102.029	2.00203	Tc09_g003190	In this study
TcChit	Chitinase 10	ATACCCAACGATGGACGTGT	TCACAAGCACTGCCCTATGT	104.146	2.04146	Tc01_g032950	In this study
TcCNGI	Putative cyclic nucleotide-gated ion channel 13	GCAGTTCCAGCACACTTTCA	TGCATAAAGAGTGGCACCAA	100.811	2.00811	Tc01_g034560	In this study
TcCop1	Putative Copine-1	AGCTGCCTGGACAGTTTTTG	TTTGTGCTTGAAAAAGTAAAAAGG	95.8129	1.95813	Tc05_g024300	In this study
TcCP450	Cytochrome P450, putative	GCAAAGATGGCACTGGCTAT	CGTAAACCTTTATTTCCATTCCTTT	116.265	2.16265	Tc04_g025050	In this study
TcCurm	Cucumisin	CTTTCTCATCAAGGGGTCCA	TAGCAGCAGGAGACCATGTG	100.83	2.0083	Tc10_g002360	In this study
TcDefl170	Putative defensin-like protein 170	AATGCTATCGGCAGTTGTGA	GGGTGACGACAAATGCAAGT	101.438	2.01438	Tc04_g020720	In this study
TcDRP	Putative Disease resistance response protein 206	TAATGCCCTGTCTTGTGCTG	TCGTTGTTTAACTGCGGAGA	100.811	2.00811	Tc02_g005370	In this study
TcF3'5'H	Putative Flavonoid 3',5'-hydroxylase 1	GAGCAAGATTTGTCCGGAAG	ATCAGGCGACTGAAGTTTGC	127.065	2.27065	Tc03_g025790	In this study
TcGLO	Putative Glyoxalase domain-containing protein 5	CATGGCAACAGTGGAGAAGA	AACCACAGGGAGGTTGTCAC	103.012	2.03012	Tc09_g011060	In this study
TcGLP1	Germin-like protein subfamily 1 member 13	TAATGCAGTTGCCTTTGCTG	AACCGGGACTGAAGAGAGGT	104.97	2.00497	Tc05_g025450	In this study
TcGluX	Probable glutathione S-transferase GSTF1	TTTTTACAGCTTGGCCGATT	GCTGAAGCCACTTTGAGAAAA	92.1101	1.9211	Tc01_g030070	In this study
TcHyP1	Hypothetical protein	GCAAACAAGCTCCCATTCAT	TTGTTCACCCAAAGCAACAC	102.192	2.02192	Tc06_g015680	In this study
TcHyP2	Hypothetical protein	CAAGCATATAGGCACACCTTTTC	TAAAGAGGATTCAGAAACTATCAAGA	107.332	2.07332	Tc03_g029480	In this study
TcHyP3	Hypothetical protein	GGATGGCAGCCTCCAAAT	CGCTTCCTCCCTTTCTAGGT	100.955	2.00955	Tc01_g016210	In this study
TcLLRre	Probable LRR receptor-like serine/threonine-protein kinase At4g29180	TCCAATGGTGAAGGAAGACC	CCTTGGGTTGATGAAGGAGA	102.029	2.02029	Tc09_g008480	In this study
TcLOC	Lignin-forming anionic peroxidase	TGCAGCGCTGTCAACTAATC	AAGCTCGAGCATTACAACTTCTT	114.432	2.14432	Tc02_g029090	In this study
TcNPR3	Putative Regulatory protein NPR3	CTTCTCCCATGGAGGTTTCA	AATGGAAAGCAACCACAAGG	109.91	2.0991	Tc06_g011480	In this study
TcPact2	Pectinesterase 2	TTGAAGCCGGTACAAAGCTC	TTGCGCTAGTGAGAACATGG	103.463	2.03463	Tc01_g037920	In this study
TcPect3	Pectinesterase 3	CAAACAAGAACCACAACACACA	GGTCAATCCAATGGTTATCCT	85.9942	1.85994	Tc09_g006170	In this study
TcPerox1	Peroxidase superfamily protein isoform 1	GCTAGAGCGTCATTACCCAGA	TGATGGAATAGCTCCAATACGA	106.617	2.06617	Tc04_g000470	In this study
TcPR1B	Pathogenesis-related protein 1	GTGGACCTTATGGCGAGAAC	CCATTGCTGCACCTTACCTT	116.572	2.16572	Tc02_g002410	In this study
TcPR4b	Pathogenesis-related protein PR-4B	TCAACTTGGGATGCAAACAA	CCTCTTCCATCCGTGTCAAT	97.8993	1.97899	Tc00_g012980	In this study
TcPR5	Pathogenesis-related protein 5	GCATCACTATGTTCGGTGGA	ATGGCATCAAGGACAATCAA	126.461	2.26461	Tc02_g005190	In this study
TcPRP1	Pathogen-related protein	AGGCACTGGGGTTACAATGA	CAGAACTATCCATGGCAGCA	106.504	2.06504	Tc00_g052730	In this study
TcPRP2	Pathogenesis-related protein P2	TTTGGTGTTGGGAAATGACA	CAGGGAATTGAGTTTTGAACC	115.063	2.15063	Tc05_g027220	In this study
TcPYL4	Abscisic acid receptor PYL4	GCCCGGTAACACTAGTGACG	GGAATTCCCGGTATGAGTCC	102.192	2.02192	Tc10_g000870	In this study
TcRFS2	Probable galactinol--sucrose galactosyltransferase 2	CTGTGGCAGATTTGGAACCT	CCATGAATGCTTGTCACCTG	104.027	2.04027	Tc03_g013800	In this study
TcRO	Putative Reticuline oxidase-like protein	GACACCCTACGGTGGAAGAA	TTGTTCCTCCCCAGATCAAG	193.147	2.93147	Tc06_g002020	In this study
TcSLS	Putative Secologanin synthase	CTTGGGATGGATCTCCTCAG	TCCTCCCTCAATTGGTTTTG	75.9942	1.75994	Tc03_g020450	In this study
TcWRKY1	WRKY transcription factor 22	AGCAGAGAGGATTTGGCTGA	TTAGCGAACCATGGAAGGTC	104.97	2.0497	Tc01_g035330	In this study
TcWRKY2	Putative WRKY transcription factor 22	AGATGGTCATGGGGACAAAA	AAGTCCAGCAACCACCAGTT	106.908	2.06908	Tc03_g028030	In this study
T. cacao (Tc) reference genes
TcACT	Actin	CAGACTTTGAGTTCACTTGACACAG	AGTGTCTGGATTGGAGGATCTATCT			Tc01_g010900	Bailey et al., 2006
TcACP1	Acyl carrier Protein	GGAAAGCAAGGGTGTCTCGTTGAA	GCGAGTTGAAATCTGCTGTTGTTTGG			Tc01_g039970	Ali et al., 2014
TcGAPDH	Glyceraldehyde-3-phosphate dehydrogenase, cytosolic	GATGCTCCTATGTTTGTTGTGG	TCTTCCTCCTCTCCAGTCCTT			Tc03_g014400	Pinheiro et al., 2011
Pmeg (Pm) and Ppal (Pp) reference genes
PmTP	Transmembrane protein, putative	GTTACGGCCATCTCGTCAGT	CAGAGCGTGTGGTAGGTCAC			Pmeg_00196n008626_009117	Ali et al., 2016
PpTP	Transmembrane protein, putative	GACGTGCCTGCACTCATCTA	TCCGGTGTCTTGATCGTGTA			Ppal_07964n07250_07741	Ali et al., 2016
Primers were design using the Primer3 software (version 0.4.0; http://frodo.wi.mit.edu/primer3/). Primer specificity was confirmed by melting curve analyses of real-time RT-PCR products (81 cycles of 55°C for 30s).
±Cacao gene Ids are based on T. cacao genome (Argout et al., 2010) http://cocoagendb.cirad.fr/gbrowse/cgi-bin/gbrowse/theobroma/
Reference
Ali, S. S., Melnick, R. L., Crozier, J., Phillips‐Mora, W., Strem, M. D., Shao, J., Zhang, D., Sicher, R., Meinhardt, L., and Bailey, B. A. (2014). Successful pod infections by Moniliophthora roreri result in differential Theobroma cacao gene expression depending on the clone's level of tolerance. Mol. Plant Pathol. 15, 698-710.
Ali, S. S., Shao, J., Lary, D. J., Kronmiller, B., Shen, D., Strem, M. D., Amoako-Attah, I., Akrofi, A. Y., Begoude, B. A. D., Hoopen, G. M.t., Coulibaly, K., Kebe, B. I., Melnick, R. L., Guiltinan, M. J., Tyler, B. M., Meinhardt, L. W., and Bailey, B. A. (2016). Phytophthora megakarya and P. palmivora, closely related causal agents of cacao black pod rot, underwent increases in genome sizes and …
Argout, X., Salse, J., Aury, J. M., Guiltinan, M. J., Droc, G., Gouzy, J., Allegre, M., Chaparro, C., Legavre, T., and Maximova, S.N. (2010). The genome of Theobroma cacao. Nature Genet. 43, 101-108.
Bailey, B., Bae, H., Strem, M., Roberts, D., Thomas, S., Crozier, J., Samuels, G., Choi, I. Y., and Holmes, K. (2006). Fungal and plant gene expression during the colonization of cacao seedlings by endophytic isolates of four Trichoderma species. Planta 224, 1449-1464.
Pinheiro, T., Litholdo Jr, C., Sereno, M., Leal Jr, G., Albuquerque, P. and Figueira, A. (2011) Establishing references for gene expression analyses by RT-qPCR in Theobroma cacao tissues. Genet. Mol. Res. 10, 3291-3305.

## Sheet: Sheet B
Supporting Excel file S1, Sheet B: Self-organizing map (SOM) classification of Phytophthora megakarya and P. palmivora effected cacao genes based on the RNA-Seq count data
#RNA-Seq RPKM data were log10 transformed and neural network self-organizing map analysis was employed for SOM classification.
*Based on the number of genes significantly (p ≤ 0.05) induced/repressed (≥ 2-fold) in response to Pmeg/Ppal infection (see supporting Excel file S2, Sheet A for details)
SOM class #	Number of genes in the class	Average RNA-Seq RPKM			% of genes compared to total genes in class*
					Pmeg vs control		Ppal vs control
		Control	Pmeg	Ppal	Induced	Repressed	Induced	Repressed
1	304	70804.4	95504.8	113902	28.6184	0.986842	34.2105	0.657895
2	247	3811.95	32359.6	49018.1	95.5466	0	97.5709	0
3	186	211.808	7994.1	18266.8	82.2581	0	82.2581	0
4	195	7.45751	375.552	1255.92	77.9487	0	79.4872	0
5	475	3.12329	31.4186	52.0157	87.1579	0	75.5789	0
6	818	1.43397	6.53973	7.26181	27.3839	0.244499	27.3839	0.122249
7	916	18349.3	21488.4	22276.6	12.5546	1.74672	15.5022	2.07424
8	504	2005.07	6902	8864.02	77.7778	0	90.0794	0
9	286	102.355	1276.2	2102.74	87.4126	0	100	0
10	886	22.6868	24.609	26.8906	11.6253	3.95034	13.3183	2.7088
11	790	9.07858	8.35446	8.63886	3.03797	3.29114	1.01266	2.40506
12	457	15.4149	4.0948	3.10005	0	24.2888	0	33.698
13	1737	7798.68	9153.5	9224.53	10.8808	0.978699	11.2263	1.09384
14	2046	4370.42	4336.57	4285.63	1.27077	1.46628	0.537634	1.85728
15	890	961.379	1742.32	1905.36	30.2247	0	34.382	0
16	682	178.775	281.28	328.944	24.9267	0.146628	31.8182	0
17	718	52.7434	91.8733	92.9494	25.766	0.696379	27.7159	0
18	483	59.9513	15.9098	11.079	0.414079	36.646	0	51.5528
19	2330	2445.88	2257.13	2209.36	1.6309	2.18884	1.75966	2.40343
20	1774	1437.55	1046.53	997.752	0	6.98985	0.0563698	9.58286
21	1645	664.854	570.658	582.172	3.64742	4.19453	4.86322	6.20061
22	1122	454.994	274.785	255.718	0	15.7754	0	25.3119
23	1083	194.615	115.893	110.131	0.646353	18.4672	0.0923361	24.5614
24	757	113.028	45.0493	38.9407	0	31.3078	0	42.2721

## Sheet: Sheet C
Supporting Excel file S1, Sheet C: Gene Ontology (GO) analysis of the 4 different categories of differentially expressed genes.
Ontology: Biological process (P), Cellular component (C) and Molecular function (F). *Cacao gene Ids are based on cacao genome (Argout et al., 2010) http://cocoagendb.cirad.fr/gbrowse/cgi-bin/gbrowse/theobroma/
Set 1: Induced (≥ 2 fold) in Pmeg compared to control				Set 2: Induced (≥ 2 fold) in Ppal compared to control				Set 3: Repressed (≥ 2 fold) in Pmeg compared to control				Set 4: Repressed (≥ 2 fold) in Ppal compared to control
Gene Id	e-Value	GO Names list		Gene Id	e-Value	GO Names list		Gene Id	e-Value	GO Names list		Gene Id	e-Value	GO Names list
Tc00_g000490	0	C:integral component of membrane	.	Tc00_g000490	0	C:integral component of membrane	.	Tc00_g001290	0	C:cytoplasm; F:lyase activity; P:cellular amino acid metabolic process; P:cellular nitrogen compound metabolic process; P:biosynthetic process	.	Tc00_g000810	7.5e-139	F:molecular_function	.
Tc00_g001500	0	F:molecular_function	.	Tc00_g001500	0	F:molecular_function	.	Tc00_g001690	0	F:oxidoreductase activity; F:peptidase activity; C:extracellular region	.	Tc00_g000970	0	P:biological_process; F:molecular_function	.
Tc00_g001650	0	F:ion binding; F:peptidase activity	.	Tc00_g001650	0	F:ion binding; F:peptidase activity	.	Tc00_g002020	1.59e-169	C:plastid	.	Tc00_g001290	0	C:cytoplasm; F:lyase activity; P:cellular amino acid metabolic process; P:cellular nitrogen compound metabolic process; P:biosynthetic process	.
Tc00_g001850	0	P:cellular protein modification process; F:kinase activity; C:plasma membrane; P:reproduction	.	Tc00_g001850	0	P:cellular protein modification process; F:kinase activity; C:plasma membrane; P:reproduction	.	Tc00_g002413	0	F:ion binding; F:peptidase activity; P:DNA metabolic process	.	Tc00_g001690	0	F:oxidoreductase activity; F:peptidase activity; C:extracellular region	.
Tc00_g002950	0	P:cellular protein modification process; C:cellular_component; F:kinase activity	.	Tc00_g002950	0	F:ATP binding; C:integral component of membrane; F:protein serine/threonine kinase activity; P:protein phosphorylation	.	Tc00_g004700	0	C:nucleus; F:DNA binding; P:anatomical structure formation involved in morphogenesis; P:cellular nitrogen compound metabolic process; P:biosynthetic process; P:reproduction	.	Tc00_g002020	1.59e-169	C:plastid	.
Tc00_g003200	1.15e-113	F:ion binding; C:cellular_component	.	Tc00_g003110	0	F:transmembrane transporter activity; P:homeostatic process; F:ion binding; C:cellular_component	.	Tc00_g006910	1.56e-13	F:peptidase activity; P:DNA metabolic process	.	Tc00_g002080	0	P:carbohydrate metabolic process; F:methyltransferase activity; P:cell wall organization or biogenesis; P:biosynthetic process	.
Tc00_g003360	1.5e-36	F:transferase activity, transferring acyl groups other than amino-acyl groups; P:biosynthetic process	.	Tc00_g003200	1.1e-112	F:zinc ion binding; P:metabolic process; C:integral component of membrane	.	Tc00_g007160	2.74e-24	P:secondary metabolic process; C:nucleus; F:DNA binding; F:oxidoreductase activity; F:ion binding; P:cellular nitrogen compound metabolic process; P:biosynthetic process	.	Tc00_g002260	0	F:DNA binding; C:mitochondrion; P:cellular nitrogen compound metabolic process; P:biosynthetic process; P:Response to stress	.
Tc00_g004070	0	C:cellular_component	.	Tc00_g003950	0	C:cellular_component	.	Tc00_g007220	0	P:photosynthesis; C:plastid; C:thylakoid	.	Tc00_g003190	4.75e-113	C:plasma membrane; F:hydrolase activity, acting on glycosyl bonds	.
Tc00_g004150	1.15e-90	C:cellular_component	.	Tc00_g004070	0	C:cellular_component	.	Tc00_g007730	0	P:biological_process; F:ion binding; F:lyase activity	.	Tc00_g004700	0	C:nucleus; F:DNA binding; P:anatomical structure formation involved in morphogenesis; P:cellular nitrogen compound metabolic process; P:biosynthetic process; P:reproduction	.
Tc00_g004230	0	P:cellular nitrogen compound metabolic process; F:molecular_function	.	Tc00_g004150	9.8e-91	C:integral component of membrane	.	Tc00_g010780	0	C:cellular_component	.	Tc00_g005490	7.74e-129	P:small molecule metabolic process; P:sulfur compound metabolic process; F:oxidoreductase activity; P:homeostatic process; P:protein folding; C:plastid; P:Response to stress	.
Tc00_g004530	9.3e-145	F:DNA binding; P:metabolic process; C:integral component of membrane; F:protein dimerization activity; F:amino acid binding	.	Tc00_g004530	9.3e-145	F:DNA binding; P:metabolic process; C:integral component of membrane; F:protein dimerization activity; F:amino acid binding	.	Tc00_g010790	0	C:cellular_component	.	Tc00_g007130	0	F:ion binding; P:DNA metabolic process	.
Tc00_g004690	2.49e-89	C:extracellular region	.	Tc00_g004660	0	C:plastid; F:isomerase activity	.	Tc00_g010890	0	C:cellular_component	.	Tc00_g007730	0	F:magnesium ion binding; P:metabolic process; F:terpene synthase activity	.
Tc00_g004720	2.8e-68	F:zinc ion binding; F:carbonate dehydratase activity; P:one-carbon metabolic process	.	Tc00_g004670	0	P:cellular protein modification process; F:kinase activity; C:plasma membrane	.	Tc00_g010910	0	C:cellular_component	.	Tc00_g008200	0	P:small molecule metabolic process; P:lipid metabolic process; F:ion binding; F:lyase activity; P:biosynthetic process; C:plastid	.
Tc00_g004740	1.72e-75	P:small molecule metabolic process; F:lyase activity; F:ion binding	.	Tc00_g004720	3.27e-68	P:small molecule metabolic process; F:lyase activity; F:ion binding	.	Tc00_g011660	0	P:lipid metabolic process; F:molecular_function	.	Tc00_g010130	1e-77	F:DNA binding; F:protein heterodimerization activity; C:nucleosome; C:nucleolus; C:plastid	.
Tc00_g005020	0	P:cellular protein modification process; P:anatomical structure development; F:kinase activity; C:plasma membrane; P:Response to stress; P:reproduction	.	Tc00_g004740	1.5e-75	F:zinc ion binding; F:carbonate dehydratase activity; P:one-carbon metabolic process	.	Tc00_g011830	2.49e-168	F:DNA binding	.	Tc00_g010780	0	C:cellular_component	.
Tc00_g005060	7.55e-129	P:cellular protein modification process; P:anatomical structure development; F:kinase activity; C:plasma membrane; P:Response to stress; P:reproduction	.	Tc00_g004780	0	P:secondary metabolic process; C:cytoplasm; P:catabolic process; F:lyase activity; P:cellular amino acid metabolic process; P:biosynthetic process	.	Tc00_g012130	2.16e-96	C:plastid	.	Tc00_g011830	2.49e-168	F:DNA binding	.
Tc00_g005080	0	P:cellular protein modification process; C:cellular_component; F:kinase activity	.	Tc00_g004910	9.56e-73	F:ion binding; C:cellular_component	.	Tc00_g012460	0	P:cellular protein modification process; C:cellular_component; F:kinase activity	.	Tc00_g012120	0	C:cytoplasm; P:cellular protein modification process; P:anatomical structure development; F:kinase activity; F:enzyme regulator activity; C:plasma membrane; P:reproduction; P:growth; F:enzyme binding	.
Tc00_g005620	0	F:oxidoreductase activity	.	Tc00_g005020	0	P:cellular protein modification process; P:anatomical structure development; F:kinase activity; C:plasma membrane; P:Response to stress; P:reproduction	.	Tc00_g013380	1.58e-138	C:mitochondrion; P:cellular nitrogen compound metabolic process	.	Tc00_g012130	2.16e-96	C:plastid	.
Tc00_g006220	9e-149	C:nucleus; F:DNA binding; F:transcription factor activity, sequence-specific DNA binding; P:transcription, DNA-templated; P:regulation of transcription, DNA-templated	.	Tc00_g005050	5.74e-171	P:cellular protein modification process; C:cellular_component; F:kinase activity	.	Tc00_g013470	0	C:cell wall; P:anatomical structure formation involved in morphogenesis; F:peptidase activity; C:extracellular region; C:vacuole	.	Tc00_g012460	0	P:cellular protein modification process; C:cellular_component; F:kinase activity	.
Tc00_g006890	0	F:DNA binding; F:translation factor activity, RNA binding; C:protein complex; C:nucleoplasm	.	Tc00_g005060	7.55e-129	P:cellular protein modification process; P:anatomical structure development; F:kinase activity; C:plasma membrane; P:Response to stress; P:reproduction	.	Tc00_g013580	8.64e-111	P:signal transduction; F:molecular_function; P:Response to stress	.	Tc00_g013070	1.58e-175	C:intracellular	.
Tc00_g007000	0	F:ion binding; F:peptidase activity; C:extracellular region	.	Tc00_g005080	0	P:cellular protein modification process; C:cellular_component; F:kinase activity	.	Tc00_g013610	0	P:signal transduction; C:cellular_component; F:molecular_function; P:Response to stress	.	Tc00_g013110	8.6e-105	P:embryo development; C:nucleus; P:Cell differentiation; F:kinase activity; P:transport; P:reproduction	.
Tc00_g007260	0	P:cellular protein modification process; F:kinase activity; C:plasma membrane	.	Tc00_g005640	8.7e-135	C:integral component of membrane	.	Tc00_g014280	0	F:Rho guanyl-nucleotide exchange factor activity; P:positive regulation of GTPase activity	.	Tc00_g013330	0	C:cellular_component; F:molecular_function	.
Tc00_g008150	0	C:cellular_component	.	Tc00_g006220	9e-149	C:nucleus; F:DNA binding; F:transcription factor activity, sequence-specific DNA binding; P:transcription, DNA-templated; P:regulation of transcription, DNA-templated	.	Tc00_g014310	0	P:flavonoid glucuronidation; F:anthocyanidin 3-O-glucosyltransferase activity; F:quercetin 3-O-glucosyltransferase activity; C:intracellular membrane-bounded organelle; F:quercetin 7-O-glucosyltransferase activity; P:flavonoid biosynthetic process	.	Tc00_g013470	0	C:cell wall; P:anatomical structure formation involved in morphogenesis; F:peptidase activity; C:extracellular region; C:vacuole	.
Tc00_g008710	1.29e-105	F:ion binding; F:peptidase activity; C:extracellular region	.	Tc00_g006550	0	P:cellular protein modification process; C:cellular_component; F:kinase activity	.	Tc00_g015330	4.72e-24	P:transport	.	Tc00_g013610	0	P:signal transduction; C:cellular_component; F:molecular_function; P:Response to stress	.
Tc00_g009650	0	C:cell; P:carbohydrate metabolic process; P:catabolic process; F:hydrolase activity, acting on glycosyl bonds	.	Tc00_g006890	0	F:DNA binding; F:translation factor activity, RNA binding; C:protein complex; C:nucleoplasm	.	Tc00_g016650	0	P:biological_process; C:cytoskeleton; F:cytoskeletal protein binding	.	Tc00_g013870	6.49e-107	P:signal transduction; F:molecular_function; P:Response to stress	.
Tc00_g009780	3.7e-35	C:integral component of membrane	.	Tc00_g006990	1.69e-31	F:aspartic-type endopeptidase activity; F:transferase activity, transferring acyl groups other than amino-acyl groups; P:DNA integration; F:peptidase activity; P:translational initiation; P:translational elongation; F:GTP binding; F:nucleic acid binding; F:translation initiation factor activity; C:nucleus; F:translation elongation factor activity; F:GTPase activity; P:proteolysis; C:membrane; C:i…	.	Tc00_g016670	2.66e-148	F:oxidoreductase activity; F:ion binding; C:cellular_component	.	Tc00_g013990	0	C:endosome; C:Golgi apparatus; F:methyltransferase activity; C:vacuole	.
Tc00_g009990	2.51e-75	F:transmembrane transporter activity; F:protein transporter activity; C:cellular_component	.	Tc00_g007000	0	F:ion binding; F:peptidase activity; C:extracellular region	.	Tc00_g017750	4.82e-131	F:molecular_function	.	Tc00_g014260	2.14e-78	F:peptidase activity	.
Tc00_g010120	0	C:nucleus; F:DNA binding; P:cellular nitrogen compound metabolic process; P:biosynthetic process	.	Tc00_g007050	1.46e-95	F:GTPase activity; F:translation factor activity, RNA binding	.	Tc00_g019970	3.52e-169	F:DNA binding; C:mitochondrion; P:cellular nitrogen compound metabolic process; P:biosynthetic process; C:plastid	.	Tc00_g014280	0	P:biological_process; F:molecular_function	.
Tc00_g010320	2.95e-76	C:nucleus; F:DNA binding; P:cellular nitrogen compound metabolic process; P:biosynthetic process	.	Tc00_g007080	0	F:nucleic acid binding; F:catalytic activity; F:metal ion binding; P:DNA metabolic process	.	Tc00_g020540	0	P:cellular protein modification process; C:cellular_component; F:kinase activity; F:signal transducer activity	.	Tc00_g015082	0	F:molecular_function	.
Tc00_g010560	0	C:nucleus; C:cytoplasm; P:signal transduction; F:ion binding; P:cellular protein modification process; F:kinase activity; C:plasma membrane	.	Tc00_g007980	4.96e-171	C:cellular_component	.	Tc00_g020870	1.73e-146	F:DNA binding	.	Tc00_g015083	8e-77	F:nucleic acid binding; F:zinc ion binding	.
Tc00_g010700	1.5e-63	P:flavonoid glucuronidation; F:quercetin 3-O-glucosyltransferase activity; C:intracellular membrane-bounded organelle; F:quercetin 7-O-glucosyltransferase activity; P:flavonoid biosynthetic process	.	Tc00_g008150	0	C:cellular_component	.	Tc00_g020990	0	C:cell; F:protein disulfide oxidoreductase activity; F:electron carrier activity; P:cell redox homeostasis; P:oxidation-reduction process	.	Tc00_g015330	4.72e-24	P:transport	.
Tc00_g010720	0	C:cellular_component	.	Tc00_g008380	0	C:integral component of membrane	.	Tc00_g021200	0	P:Cell division; C:cytoplasm; F:GTPase activity; P:Cell cycle	.	Tc00_g015350	8.01e-126	P:small molecule metabolic process; P:secondary metabolic process; F:oxidoreductase activity; P:signal transduction; P:lipid metabolic process; F:ion binding; C:endoplasmic reticulum; P:biosynthetic process; C:plastid	.
Tc00_g010940	0	C:integral component of membrane	.	Tc00_g008560	0	P:carbohydrate metabolic process; F:hydrolase activity, acting on glycosyl bonds	.	Tc00_g022370	2.02e-76	F:methyltransferase activity; C:plastid	.	Tc00_g016650	0	P:biological_process; C:cytoskeleton; F:cytoskeletal protein binding	.
Tc00_g011530	6.97e-121	P:anatomical structure development	.	Tc00_g008710	1.29e-105	F:ion binding; F:peptidase activity; C:extracellular region	.	Tc00_g022550	0	F:molecular_function; P:Response to stress	.	Tc00_g016670	2.66e-148	F:oxidoreductase activity; F:ion binding; C:cellular_component	.
Tc00_g011650	4.9e-58	C:integral component of membrane	.	Tc00_g009650	0	C:cell; P:carbohydrate metabolic process; P:catabolic process; F:hydrolase activity, acting on glycosyl bonds	.	Tc00_g023070	0	P:embryo development; C:nucleus; P:catabolic process; P:mitotic nuclear division; C:protein complex; P:reproduction	.	Tc00_g017930	0	P:cellular protein modification process; C:cellular_component; F:kinase activity; P:reproduction	.
Tc00_g011700	0	P:carbohydrate metabolic process; F:transferase activity, transferring glycosyl groups; C:cytosol; C:Golgi apparatus; P:cell wall organization or biogenesis; P:biosynthetic process; P:cellular nitrogen compound metabolic process; F:isomerase activity	.	Tc00_g009780	4.32e-35	C:cellular_component	.	Tc00_g024350	2.14e-100	C:cellular_component	.	Tc00_g018080	0	F:methyltransferase activity	.
Tc00_g011750	4.9e-170	F:zinc ion binding	.	Tc00_g009990	2.51e-75	F:transmembrane transporter activity; F:protein transporter activity; C:cellular_component	.	Tc00_g025030	1.73e-89	C:nucleus; F:molecular_function	.	Tc00_g018830	0	F:molecular_function; P:Response to stress	.
Tc00_g012290	1.29e-143	C:cellular_component; F:kinase activity	.	Tc00_g010120	0	C:nucleus; F:DNA binding; P:cellular nitrogen compound metabolic process; P:biosynthetic process	.	Tc00_g025280	0	P:carbohydrate metabolic process; F:transferase activity, transferring glycosyl groups; C:cell wall; P:cell wall organization or biogenesis; C:extracellular region; F:hydrolase activity, acting on glycosyl bonds	.	Tc00_g018930	0	F:molecular_function; P:Response to stress	.
Tc00_g012500	3.43e-34	F:ion binding; C:cellular_component; F:kinase activity	.	Tc00_g010560	0	C:nucleus; C:cytoplasm; P:signal transduction; F:ion binding; P:cellular protein modification process; F:kinase activity; C:plasma membrane	.	Tc00_g026760	7.51e-24	C:cellular_component	.	Tc00_g019970	3.52e-169	F:DNA binding; C:mitochondrion; P:cellular nitrogen compound metabolic process; P:biosynthetic process; C:plastid	.
Tc00_g012870	0	F:nucleic acid binding	.	Tc00_g010700	1.5e-63	P:flavonoid glucuronidation; F:quercetin 3-O-glucosyltransferase activity; C:intracellular membrane-bounded organelle; F:quercetin 7-O-glucosyltransferase activity; P:flavonoid biosynthetic process	.	Tc00_g026770	2.92e-84	C:cellular_component	.	Tc00_g020320	1.61e-176	C:cytoplasm; F:oxidoreductase activity; P:lipid metabolic process	.
Tc00_g012970	1.5e-165	C:integral component of membrane	.	Tc00_g010720	4.1e-153	C:integral component of membrane	.	Tc00_g027200	0	F:peptidase activity	.	Tc00_g020540	0	P:cellular protein modification process; C:cellular_component; F:kinase activity; F:signal transducer activity	.
Tc00_g012980	7.9e-124	F:chitin binding; P:Defense response to fungus; P:defense response to bacterium	.	Tc00_g010771	1.6e-29	F:nucleic acid binding; F:ATP binding; F:metal ion binding; P:DNA integration; F:protein kinase activity; F:ADP binding; P:protein phosphorylation; P:defense response; F:hydrolase activity	.	Tc00_g030380	5.8e-160	C:nucleus; F:DNA binding; P:transcription, DNA-templated; C:integral component of membrane; P:regulation of transcription, DNA-templated	.	Tc00_g020580	5.63e-34	F:ion binding; C:cellular_component	.
Tc00_g013390	0	F:oxidoreductase activity; F:ion binding; C:cellular_component	.	Tc00_g010940	0	C:integral component of membrane	.	Tc00_g031500	4.34e-74	F:transmembrane transporter activity; C:mitochondrion; C:plasma membrane	.	Tc00_g020590	3.37e-56	F:ion binding; C:cellular_component	.
Tc00_g013400	0	P:small molecule metabolic process; F:oxidoreductase activity; P:lipid metabolic process; F:ion binding; P:biosynthetic process	.	Tc00_g011530	6.97e-121	P:anatomical structure development	.	Tc00_g033080	0	P:lignin catabolic process; F:copper ion binding; C:apoplast; P:oxidation-reduction process; F:hydroquinone:oxygen oxidoreductase activity	.	Tc00_g020870	1.73e-146	F:DNA binding	.
Tc00_g013560	7.5e-80	P:signal transduction; F:ADP binding; P:defense response	.	Tc00_g011650	4.9e-58	C:integral component of membrane	.	Tc00_g033120	0	P:secondary metabolic process; F:oxidoreductase activity; P:catabolic process; F:ion binding; C:extracellular region	.	Tc00_g020990	0	C:cell; F:oxidoreductase activity; P:homeostatic process	.
Tc00_g013561	0	P:DNA metabolic process; F:molecular_function	.	Tc00_g011700	0	P:carbohydrate metabolic process; F:transferase activity, transferring glycosyl groups; C:cytosol; C:Golgi apparatus; P:cell wall organization or biogenesis; P:biosynthetic process; P:cellular nitrogen compound metabolic process; F:isomerase activity	.	Tc00_g034040	0	F:DNA binding; F:nucleotidyltransferase activity; F:ion binding; C:protein complex; C:chromosome; P:biosynthetic process; P:DNA metabolic process	.	Tc00_g021200	0	P:Cell division; C:cytoplasm; F:GTPase activity; P:Cell cycle	.
Tc00_g013860	0	C:membrane; C:integral component of membrane	.	Tc00_g011750	0	F:nucleic acid binding; F:zinc ion binding	.	Tc00_g034180	0	C:cytoskeleton	.	Tc00_g022370	2.02e-76	F:methyltransferase activity; C:plastid	.
Tc00_g013900	3.7e-84	C:integral component of membrane	.	Tc00_g012290	1.9e-143	C:integral component of membrane; P:phosphorylation; F:kinase activity	.	Tc00_g034720	0	P:carbohydrate metabolic process; C:cellular_component; F:hydrolase activity, acting on glycosyl bonds	.	Tc00_g022740	0	C:nucleus; P:cellular nitrogen compound metabolic process; P:biosynthetic process; F:molecular_function	.
Tc00_g014070	0	F:nucleotidyltransferase activity; F:nuclease activity; P:biosynthetic process; P:DNA metabolic process	.	Tc00_g012870	0	F:nucleic acid binding	.	Tc00_g035560	0	C:cellular_component	.	Tc00_g023070	0	P:embryo development; C:nucleus; P:catabolic process; P:mitotic nuclear division; C:protein complex; P:reproduction	.
Tc00_g014200	0	F:ADP binding; P:defense response	.	Tc00_g012970	1.5e-165	C:integral component of membrane	.	Tc00_g036410	8.08e-134	P:carbohydrate metabolic process; C:membrane; C:integral component of membrane; F:hydrolase activity, hydrolyzing O-glycosyl compounds	.	Tc00_g023090	8.04e-159	C:nucleus; P:signal transduction; P:cellular nitrogen compound metabolic process; P:biosynthetic process	.
Tc00_g014210	8e-60	C:integral component of membrane	.	Tc00_g012980	2.9e-124	F:molecular_function; P:Response to stress	.	Tc00_g037010	0	C:cellular_component	.	Tc00_g025030	1.73e-89	C:nucleus; F:molecular_function	.
Tc00_g014330	0	C:cellular_component	.	Tc00_g013000	0	P:cellular nitrogen compound metabolic process; P:biosynthetic process	.	Tc00_g037060	0	F:transferase activity, transferring acyl groups; F:oxidoreductase activity	.	Tc00_g025170	5.99e-145	F:ion binding; C:cellular_component	.
Tc00_g014370	0	C:cellular_component	.	Tc00_g013350	0	P:small molecule metabolic process; P:cellular nitrogen compound metabolic process; C:plastid; F:molecular_function; P:Response to stress	.	Tc00_g037430	7.4e-49	C:cytoplasm; F:oxidoreductase activity; P:lipid metabolic process	.	Tc00_g026190	0	F:molecular_function	.
Tc00_g014430	7.37e-53	F:DNA binding	.	Tc00_g013390	0	F:oxidoreductase activity; F:ion binding; C:cellular_component	.	Tc00_g037660	0	P:cellular protein modification process; F:ligase activity	.	Tc00_g026460	0	F:oxidoreductase activity	.
Tc00_g014490	0	F:nucleic acid binding; F:zinc ion binding; C:membrane; C:integral component of membrane	.	Tc00_g013400	0	F:oxidoreductase activity, acting on single donors with incorporation of molecular oxygen, incorporation of two atoms of oxygen; F:metal ion binding; P:oxylipin biosynthetic process; P:oxidation-reduction process	.	Tc00_g039780	0	F:ion binding	.	Tc00_g027200	0	P:proteolysis; F:peptidase activity	.
Tc00_g014630	6.2e-146	P:membrane organization; P:vesicle-mediated transport; C:cytoplasm; C:protein complex; F:molecular_function	.	Tc00_g013410	3.04e-59	F:calcium ion binding	.	Tc00_g040540	4.68e-45	C:cellular_component	.	Tc00_g027760	0	C:plastid; F:molecular_function	.
Tc00_g014850	0	F:transferase activity, transferring glycosyl groups; C:cellular_component	.	Tc00_g013560	8.86e-80	P:signal transduction; F:molecular_function; P:Response to stress	.	Tc00_g041430	1.68e-53	P:photosynthesis; C:protein complex; C:thylakoid	.	Tc00_g028110	0	F:DNA binding; C:mitochondrion; F:methyltransferase activity; P:cellular nitrogen compound metabolic process; P:biosynthetic process; C:plastid	.
Tc00_g015270	0	F:transferase activity, transferring acyl groups	.	Tc00_g013860	0	C:membrane; C:integral component of membrane	.	Tc00_g043690	0	P:Cell division; P:cytoskeleton organization; F:cytoskeletal protein binding; P:Cell cycle	.	Tc00_g028950	0	P:embryo development; P:cellular protein modification process; P:anatomical structure formation involved in morphogenesis; F:kinase activity; C:plasma membrane; P:reproduction	.
Tc00_g015610	0	P:lignin catabolic process; F:copper ion binding; C:apoplast; P:oxidation-reduction process; F:hydroquinone:oxygen oxidoreductase activity	.	Tc00_g013900	3.7e-84	C:integral component of membrane	.	Tc00_g043970	7.1e-61	C:plasmodesma; P:proteolysis; F:peptidase activity	.	Tc00_g029490	2.45e-56	C:cellular_component	.
Tc00_g016070	0	F:oxidoreductase activity; P:cellular protein modification process; F:signal transducer activity; F:kinase activity; C:intracellular	.	Tc00_g014040	8.42e-34	C:plasma membrane	.	Tc00_g044190	0	F:peptidase activity	.	Tc00_g030380	2.65e-164	C:nucleus; F:DNA binding; P:cellular nitrogen compound metabolic process; P:biosynthetic process	.
Tc00_g016370	0	F:magnesium ion binding; P:metabolic process; F:terpene synthase activity	.	Tc00_g014070	0	F:nucleotidyltransferase activity; F:nuclease activity; P:biosynthetic process; P:DNA metabolic process	.	Tc00_g044330	5.2e-95	C:nucleus; F:DNA binding; F:nucleic acid binding transcription factor activity; P:cellular nitrogen compound metabolic process; P:biosynthetic process	.	Tc00_g032500	0	P:embryo development; F:transmembrane transporter activity; P:signal transduction; P:homeostatic process; C:cell wall; P:anatomical structure formation involved in morphogenesis; C:endoplasmic reticulum; C:plasma membrane; P:reproduction	.
Tc00_g017090	4.01e-94	P:catabolic process; P:cellular protein modification process; F:peptidase activity	.	Tc00_g014200	0	F:molecular_function; P:Response to stress	.	Tc00_g044720	0	F:oxidoreductase activity; F:ion binding; C:cellular_component	.	Tc00_g033080	0	P:secondary metabolic process; F:oxidoreductase activity; P:catabolic process; F:ion binding; C:extracellular region	.
Tc00_g017400	2.62e-102	P:catabolic process; F:lyase activity; P:cellular amino acid metabolic process	.	Tc00_g014210	9.37e-60	C:cellular_component	.	Tc00_g044820	2.97e-92	F:ion binding; F:lipid binding; C:plasma membrane	.	Tc00_g033120	0	P:secondary metabolic process; F:oxidoreductase activity; P:catabolic process; F:ion binding; C:extracellular region	.
Tc00_g017690	0	P:transport; C:intracellular; F:molecular_function	.	Tc00_g014330	0	C:cellular_component	.	Tc00_g045610	0	F:oxidoreductase activity; P:catabolic process; F:ion binding; C:extracellular region; P:Response to stress	.	Tc00_g034040	0	F:DNA binding; F:nucleotidyltransferase activity; F:ion binding; C:protein complex; C:chromosome; P:biosynthetic process; P:DNA metabolic process	.
Tc00_g017711	1.1e-39	F:nucleic acid binding; F:RNA-directed DNA polymerase activity; P:RNA-dependent DNA biosynthetic process	.	Tc00_g014370	0	C:cellular_component	.	Tc00_g045700	4.9e-125	F:guiding stereospecific synthesis activity; P:regulation of catalytic activity; P:phenylpropanoid biosynthetic process	.	Tc00_g034180	0	C:cytoskeleton	.
Tc00_g017720	0	F:transmembrane transporter activity; C:cellular_component	.	Tc00_g014430	7.37e-53	F:DNA binding	.	Tc00_g046240	0	C:plasma membrane	.	Tc00_g034720	0	P:carbohydrate metabolic process; C:cellular_component; F:hydrolase activity, acting on glycosyl bonds	.
Tc00_g018350	9.47e-42	C:cellular_component	.	Tc00_g014490	0	F:nucleic acid binding; F:zinc ion binding; C:membrane; C:integral component of membrane	.	Tc00_g047130	0	P:small molecule metabolic process; P:carbohydrate metabolic process; F:oxidoreductase activity	.	Tc00_g035070	0	F:oxidoreductase activity; F:ion binding; C:cellular_component	.
Tc00_g018650	0	F:ion binding; P:cellular protein modification process; F:signal transducer activity; F:kinase activity; C:intracellular; C:plasma membrane	.	Tc00_g014500	0	F:peptidase activity; C:cellular_component	.	Tc00_g048830	1.7e-104	F:peptidase activity	.	Tc00_g035130	0	C:nucleus; F:DNA binding; P:cellular nitrogen compound metabolic process; P:biosynthetic process	.
Tc00_g018880	0	P:DNA metabolic process; F:molecular_function; P:Response to stress	.	Tc00_g014630	6.2e-146	P:membrane organization; P:vesicle-mediated transport; C:cytoplasm; C:protein complex; F:molecular_function	.	Tc00_g048860	0	F:peptidase activity	.	Tc00_g035560	0	C:cellular_component	.
Tc00_g019461	1.3e-64	F:nucleic acid binding; C:membrane; C:integral component of membrane; P:DNA integration	.	Tc00_g014850	0	F:transferase activity, transferring glycosyl groups; C:cellular_component	.	Tc00_g049380	0	P:secondary metabolic process; F:oxidoreductase activity; F:ion binding; P:biosynthetic process; C:cellular_component; P:Response to stress	.	Tc00_g036660	1.63e-137	C:cell; F:transmembrane transporter activity; P:homeostatic process	.
Tc00_g019670	2.48e-173	C:cellular_component	.	Tc00_g015270	0	F:transferase activity, transferring acyl groups other than amino-acyl groups; P:metabolic process	.	Tc00_g049420	3.71e-166	F:ATPase activity; P:small molecule metabolic process; F:transmembrane transporter activity; P:anatomical structure development; C:protein complex; P:cellular nitrogen compound metabolic process; P:biosynthetic process; C:plastid	.	Tc00_g037010	0	C:cellular_component	.
Tc00_g019770	3.47e-139	C:endoplasmic reticulum; P:transport; C:plasma membrane	.	Tc00_g015610	0	P:secondary metabolic process; F:oxidoreductase activity; P:catabolic process; F:ion binding; C:extracellular region	.	Tc00_g049591	0	F:ion binding; P:cellular protein modification process; P:DNA metabolic process; C:cellular_component; F:kinase activity; P:Response to stress	.	Tc00_g037060	0	F:transferase activity, transferring acyl groups; F:oxidoreductase activity	.
Tc00_g019880	0	F:oxidoreductase activity; F:ion binding; C:cellular_component	.	Tc00_g015770	0	F:molecular_function	.	Tc00_g051140	0	C:membrane; C:integral component of membrane	.	Tc00_g038560	0	C:cell wall; F:peptidase activity	.
Tc00_g019890	6.7e-180	F:oxidoreductase activity; F:ion binding; C:cellular_component	.	Tc00_g015790	0	P:vesicle-mediated transport; C:cytoplasm; C:protein complex	.	Tc00_g052240	0	C:cellular_component	.	Tc00_g039780	0	F:ion binding	.
Tc00_g020040	7.91e-155	C:cellular_component	.	Tc00_g015810	0	F:transferase activity, transferring acyl groups other than amino-acyl groups; C:integral component of membrane; P:fatty acid biosynthetic process	.	Tc00_g054120	0	P:small molecule metabolic process; F:oxidoreductase activity; P:lipid metabolic process; F:ion binding; P:biosynthetic process; C:cellular_component	.	Tc00_g040540	4.68e-45	C:cellular_component	.
Tc00_g020150	0	F:transferase activity, transferring glycosyl groups; F:ion binding; F:lipid binding; C:plasma membrane	.	Tc00_g016060	0	F:nucleic acid binding; P:RNA phosphodiester bond hydrolysis, endonucleolytic; F:RNA-DNA hybrid ribonuclease activity; P:DNA metabolic process	.	Tc00_g054550	0	C:protein complex; C:intracellular	.	Tc00_g040550	0	P:cellular protein modification process; C:cellular_component; F:kinase activity	.
Tc00_g020450	2.29e-111	F:lyase activity	.	Tc00_g016070	0	F:oxidoreductase activity; P:cellular protein modification process; F:signal transducer activity; F:kinase activity; C:intracellular	.	Tc00_g054560	0	C:cellular_component	.	Tc00_g040650	0	P:cellular protein modification process; F:kinase activity; C:plasma membrane	.
Tc00_g020810	0	F:transmembrane transporter activity; C:plasma membrane	.	Tc00_g016370	0	P:biological_process; F:ion binding; F:lyase activity	.	Tc00_g054770	0	F:ion binding; C:cytosol; P:cellular amino acid metabolic process; P:biosynthetic process	.	Tc00_g040990	0	P:secondary metabolic process; F:transferase activity, transferring acyl groups; P:catabolic process; F:peptidase activity	.
Tc00_g021170	0	F:molecular_function	.	Tc00_g017090	4.01e-94	P:catabolic process; P:cellular protein modification process; F:peptidase activity	.	Tc00_g055690	1.62e-141	F:oxidoreductase activity; F:ion binding; C:cellular_component	.	Tc00_g041430	1.68e-53	P:photosynthesis; C:protein complex; C:thylakoid	.
Tc00_g021644	0	F:nucleotidyltransferase activity; F:nuclease activity; P:biosynthetic process; P:DNA metabolic process	.	Tc00_g017400	2.62e-102	P:catabolic process; F:lyase activity; P:cellular amino acid metabolic process	.	Tc00_g055800	0	F:nuclease activity; P:nucleobase-containing compound catabolic process; P:DNA metabolic process	.	Tc00_g042290	5.42e-169	C:cell wall; P:cell wall organization or biogenesis; C:extracellular region	.
Tc00_g021850	0	F:ion binding; P:cellular protein modification process	.	Tc00_g017690	0	P:transport; C:intracellular; F:molecular_function	.	Tc00_g055920	0	P:carbohydrate metabolic process; P:catabolic process; F:lyase activity; F:ion binding; C:cellular_component	.	Tc00_g043690	0	P:Cell division; P:cytoskeleton organization; F:cytoskeletal protein binding; P:Cell cycle	.
Tc00_g021890	1.3e-146	P:metabolic process; F:hydrolase activity	.	Tc00_g017711	1.1e-39	F:nucleic acid binding; F:RNA-directed DNA polymerase activity; P:RNA-dependent DNA biosynthetic process	.	Tc00_g055960	2.5e-151	C:cellular_component; P:transport; F:molecular_function	.	Tc00_g043970	7.1e-61	C:plasmodesma; P:proteolysis; F:peptidase activity	.
Tc00_g022270	1.47e-39	P:carbohydrate metabolic process; F:hydrolase activity, acting on glycosyl bonds	.	Tc00_g017720	0	F:transmembrane transporter activity; C:cellular_component	.	Tc00_g057950	0	P:catabolic process; P:cellular protein modification process; C:protein complex; C:intracellular; F:ligase activity	.	Tc00_g044330	5.2e-95	C:nucleus; F:DNA binding; F:nucleic acid binding transcription factor activity; P:cellular nitrogen compound metabolic process; P:biosynthetic process	.
Tc00_g022460	0	F:molecular_function; P:Response to stress	.	Tc00_g018350	9.47e-42	C:cellular_component	.	Tc00_g059990	1.41e-175	C:cellular_component; F:molecular_function	.	Tc00_g044720	0	F:oxidoreductase activity; F:ion binding; C:cellular_component	.
Tc00_g022530	0	P:carbohydrate metabolic process; P:Response to stress; F:hydrolase activity, acting on glycosyl bonds	.	Tc00_g018450	0	P:carbohydrate metabolic process; C:cell wall; F:lyase activity; P:cell wall organization or biogenesis; C:extracellular region; F:hydrolase activity, acting on glycosyl bonds	.	Tc00_g060790	0	P:Cell division; P:cellular protein modification process; F:kinase activity	.	Tc00_g044750	0	C:cellular_component	.
Tc00_g023100	3.17e-126	C:nucleus; P:signal transduction; P:cellular nitrogen compound metabolic process; P:biosynthetic process	.	Tc00_g018650	0	F:ion binding; P:cellular protein modification process; F:signal transducer activity; F:kinase activity; C:intracellular; C:plasma membrane	.	Tc00_g063230	0	P:cytoskeleton organization; F:cytoskeletal protein binding; P:Response to stress	.	Tc00_g045160	0	P:ribosome biogenesis; C:cellular_component	.
Tc00_g023170	0	F:DNA binding; F:nucleic acid binding transcription factor activity; P:cellular nitrogen compound metabolic process; P:biosynthetic process	.	Tc00_g019670	2e-170	C:integral component of membrane	.	Tc00_g063271	0	C:intracellular; F:molecular_function	.	Tc00_g045350	0	C:plastid; C:thylakoid	.
Tc00_g023240	0	P:cellular protein modification process; P:transport	.	Tc00_g019720	0	P:cellular protein modification process; F:kinase activity; C:plasma membrane; P:reproduction	.	Tc00_g063320	1.91e-08	C:cellular_component	.	Tc00_g045610	0	F:oxidoreductase activity; P:catabolic process; F:ion binding; C:extracellular region; P:Response to stress	.
Tc00_g023290	0	P:cell morphogenesis; F:molecular_function; P:growth	.	Tc00_g019770	3.47e-139	C:endoplasmic reticulum; P:transport; C:plasma membrane	.	Tc00_g064020	1.38e-144	C:nucleus; F:DNA binding; F:transferase activity, transferring acyl groups; F:nucleic acid binding transcription factor activity; F:transcription factor activity, protein binding; F:ion binding; P:cellular protein modification process; P:cellular nitrogen compound metabolic process; P:biosynthetic process	.	Tc00_g045700	5.83e-125	P:secondary metabolic process; P:biosynthetic process; F:enzyme regulator activity	.
Tc00_g023560	4.4e-168	F:ATP binding; F:ADP binding; P:defense response	.	Tc00_g019880	0	F:iron ion binding; F:oxidoreductase activity, acting on paired donors, with incorporation or reduction of molecular oxygen; C:integral component of membrane; P:oxidation-reduction process; F:monooxygenase activity; F:heme binding	.	Tc00_g064600	0	F:oxidoreductase activity; F:ion binding	.	Tc00_g046240	0	C:plasma membrane	.
Tc00_g023570	0	F:ATP binding; F:ADP binding; P:defense response	.	Tc00_g019890	5.7e-180	F:iron ion binding; F:oxidoreductase activity, acting on paired donors, with incorporation or reduction of molecular oxygen; C:integral component of membrane; P:oxidation-reduction process; F:monooxygenase activity; F:heme binding	.	Tc00_g065780	4.04e-20	C:membrane; C:integral component of membrane; P:transport; F:transporter activity	.	Tc00_g047130	0	P:small molecule metabolic process; P:carbohydrate metabolic process; F:oxidoreductase activity	.
Tc00_g023870	2.56e-71	P:carbohydrate metabolic process; F:hydrolase activity, acting on glycosyl bonds	.	Tc00_g020040	6.7e-155	C:integral component of membrane	.	Tc00_g066880	3.49e-169	P:generation of precursor metabolites and energy; F:ion binding; P:cellular protein modification process; P:photosynthesis; C:protein complex; C:plastid; C:thylakoid	.	Tc00_g047980	1.71e-109	C:endoplasmic reticulum; P:transport	.
Tc00_g023980	0	F:ion binding	.	Tc00_g020180	0	F:DNA binding; P:cellular nitrogen compound metabolic process; P:biosynthetic process; C:cellular_component	.	Tc00_g066950	0	F:molecular_function	.	Tc00_g048210	6.45e-50	P:secondary metabolic process; F:oxidoreductase activity; P:catabolic process; F:ion binding; C:extracellular region	.
Tc00_g024250	0	F:molecular_function; P:Response to stress	.	Tc00_g020190	0	F:peroxidase activity; P:response to oxidative stress; F:metal ion binding; P:cellular oxidant detoxification; P:oxidation-reduction process; C:extracellular region; F:heme binding; P:hydrogen peroxide catabolic process	.	Tc00_g067090	0	C:integral component of membrane	.	Tc00_g048830	1.7e-104	F:peptidase activity	.
Tc00_g024360	1.54e-50	C:mitochondrion; F:ion binding; P:transport	.	Tc00_g020450	2.29e-111	F:lyase activity	.	Tc00_g069960	0	C:nucleus; F:methyltransferase activity; P:DNA metabolic process	.	Tc00_g048860	0	F:peptidase activity	.
Tc00_g024940	0	P:signal transduction; C:cellular_component; F:molecular_function; P:Response to stress	.	Tc00_g020810	0	F:transmembrane transporter activity; C:plasma membrane	.	Tc00_g071640	2.03e-60	F:molecular_function	.	Tc00_g049160	2.14e-50	C:endoplasmic reticulum; P:transport	.
Tc00_g025380	0	F:molecular_function	.	Tc00_g021150	0	F:molecular_function; P:Response to stress	.	Tc00_g072060	0	P:small molecule metabolic process; F:methyltransferase activity; P:biosynthetic process	.	Tc00_g049320	1.3e-122	F:ATP binding; F:ADP binding; P:defense response	.
Tc00_g025500	0	P:carbohydrate metabolic process; F:lyase activity; F:carbohydrate binding	.	Tc00_g021170	0	F:molecular_function	.	Tc00_g072760	6.97e-117	F:peptidase activity; C:cellular_component	.	Tc00_g049380	0	P:secondary metabolic process; F:oxidoreductase activity; F:ion binding; P:biosynthetic process; C:cellular_component; P:Response to stress	.
Tc00_g025530	0	F:molecular_function	.	Tc00_g021180	0	F:molecular_function	.	Tc00_g072770	0	F:molecular_function; P:Response to stress	.	Tc00_g049420	3.71e-166	F:ATPase activity; P:small molecule metabolic process; F:transmembrane transporter activity; P:anatomical structure development; C:protein complex; P:cellular nitrogen compound metabolic process; P:biosynthetic process; C:plastid	.
Tc00_g025750	0	C:cytosol; P:cellular amino acid metabolic process; F:molecular_function	.	Tc00_g021520	7.56e-63	F:nuclease activity; C:cellular_component	.	Tc00_g072980	0	P:cellular protein modification process; F:kinase activity; C:plasma membrane; P:reproduction	.	Tc00_g049590	2.05e-59	C:cellular_component	.
Tc00_g025870	0	P:biological_process; F:transferase activity, transferring glycosyl groups	.	Tc00_g021850	0	F:ion binding; P:cellular protein modification process	.	Tc00_g073320	1.5e-58	C:nucleus; F:ATP binding; F:polynucleotide 5'-hydroxyl-kinase activity; P:cleavage in ITS2 between 5.8S rRNA and LSU-rRNA of tricistronic rRNA transcript (SSU-rRNA, 5.8S rRNA, LSU-rRNA); P:phosphorylation	.	Tc00_g050430	1.93e-30	P:small molecule metabolic process; F:oxidoreductase activity; P:lipid metabolic process; F:ion binding; P:biosynthetic process; C:cellular_component	.
Tc00_g026000	1.1e-37	F:nucleotide binding; P:cytokinin biosynthetic process; F:ATP binding; P:tRNA processing; C:mitochondrion; C:cytosol; F:tRNA dimethylallyltransferase activity; F:transferase activity; F:AMP dimethylallyltransferase activity; P:tRNA modification	.	Tc00_g021890	1.3e-146	P:metabolic process; F:hydrolase activity	.	Tc00_g075270	0	C:cytoskeleton	.	Tc00_g051081	0	F:ion binding; P:DNA metabolic process	.
Tc00_g026270	0	P:transport; C:intracellular; F:molecular_function	.	Tc00_g022460	0	F:molecular_function; P:Response to stress	.	Tc00_g078670	0	F:metal ion binding	.	Tc00_g051140	0	C:membrane; C:integral component of membrane	.
Tc00_g026360	0	F:transferase activity, transferring acyl groups; F:oxidoreductase activity	.	Tc00_g022470	0	F:ADP binding; P:defense response	.	Tc00_g079000	1.25e-125	C:cellular_component; F:molecular_function; P:Response to stress	.	Tc00_g052000	0	F:transmembrane transporter activity; C:plasma membrane	.
Tc00_g026380	0	P:small molecule metabolic process; F:lyase activity; F:ion binding	.	Tc00_g022530	0	P:carbohydrate metabolic process; P:Response to stress; F:hydrolase activity, acting on glycosyl bonds	.	Tc00_g079080	4.4e-179	P:transmembrane transport; F:transmembrane transporter activity; C:integral component of membrane; C:plasma membrane	.	Tc00_g052081	0	F:molecular_function	.
Tc00_g026580	2.64e-87	F:ubiquitin-protein transferase activity; C:nucleus; C:Cul3-RING ubiquitin ligase complex; P:response to red light; P:protein ubiquitination	.	Tc00_g023100	1.3e-123	C:nucleus; P:transcription, DNA-templated; P:regulation of transcription, DNA-templated; P:auxin-activated signaling pathway	.	Tc00_g079120	0	F:molecular_function	.	Tc00_g052240	0	C:cellular_component	.
Tc00_g026640	1.75e-24	C:membrane; C:integral component of membrane	.	Tc00_g023170	0	F:DNA binding; F:nucleic acid binding transcription factor activity; P:cellular nitrogen compound metabolic process; P:biosynthetic process	.	Tc00_g080190	0	F:oxidoreductase activity; F:ion binding	.	Tc00_g054110	0	P:small molecule metabolic process; F:oxidoreductase activity; P:lipid metabolic process; F:ion binding; P:biosynthetic process; C:cellular_component	.
Tc00_g027050	0	F:ion binding; P:cellular protein modification process; C:cellular_component; F:kinase activity	.	Tc00_g023240	0	P:protein transport; P:cellular protein modification process	.	Tc00_g081040	6.44e-178	P:cellular protein modification process; C:cellular_component; F:kinase activity	.	Tc00_g054120	0	P:small molecule metabolic process; F:oxidoreductase activity; P:lipid metabolic process; F:ion binding; P:biosynthetic process; C:cellular_component	.
Tc00_g027110	0	P:signal transduction; F:ion binding; P:cellular protein modification process; F:kinase activity; C:plasma membrane	.	Tc00_g023550	8.51e-142	P:signal transduction; C:intracellular; F:molecular_function	.	Tc00_g081050	3.64e-108	P:cellular protein modification process; C:cellular_component; F:kinase activity	.	Tc00_g054220	0	C:cytoskeleton; C:cytoplasm; F:GTPase activity	.
Tc00_g027190	0	F:transferase activity, transferring acyl groups; F:ion binding	.	Tc00_g023570	0	F:molecular_function; P:Response to stress	.	Tc00_g081180	1.55e-92	P:regulation of GTPase activity	.	Tc00_g054550	0	C:protein complex; C:intracellular	.
Tc00_g027240	3.8e-44	F:nucleotide binding; F:ATP binding; C:membrane; C:integral component of membrane; F:protein kinase activity; P:phosphorylation; F:transferase activity; F:protein serine/threonine kinase activity; F:carbohydrate binding; P:protein phosphorylation; F:kinase activity; C:plasma membrane	.	Tc00_g023870	2.56e-71	P:carbohydrate metabolic process; F:hydrolase activity, acting on glycosyl bonds	.	Tc00_g081470	0	P:carbohydrate metabolic process; F:transferase activity, transferring glycosyl groups; C:Golgi apparatus; P:cell wall organization or biogenesis; P:biosynthetic process	.	Tc00_g054560	0	C:cellular_component	.
Tc00_g027250	2.21e-153	C:nucleus; F:DNA binding; F:nucleic acid binding transcription factor activity; P:cellular nitrogen compound metabolic process; P:biosynthetic process	.	Tc00_g023980	0	F:ion binding	.	Tc00_g081720	0	F:oxidoreductase activity; F:ligase activity	.	Tc00_g054660	3.72e-99	P:generation of precursor metabolites and energy; C:mitochondrion; P:photosynthesis; C:protein complex; C:plastid; F:molecular_function; C:thylakoid	.
Tc00_g027540	1.7e-92	C:nucleus; F:DNA binding; P:transcription, DNA-templated; P:regulation of transcription, DNA-templated	.	Tc00_g024180	3.6e-48	F:transcription factor activity, sequence-specific DNA binding; P:transcription, DNA-templated; P:regulation of transcription, DNA-templated; F:sequence-specific DNA binding	.	Tc00_g082000	1.23e-170	F:lipid binding	.	Tc00_g054901	2.02e-110	F:ion binding; P:DNA metabolic process; F:kinase activity	.
Tc00_g027643	0	F:nucleic acid binding; F:zinc ion binding; P:DNA integration	.	Tc00_g024250	0	F:molecular_function; P:Response to stress	.	Tc00_g082400	0	F:ATPase activity; F:helicase activity; P:cellular nitrogen compound metabolic process; C:plastid	.	Tc00_g055281	2.88e-62	F:nucleic acid binding; C:nucleus; F:aspartic-type endopeptidase activity; P:proteolysis; P:DNA integration	.
Tc00_g027670	0	P:cellular protein modification process; C:cellular_component; F:kinase activity; P:reproduction	.	Tc00_g024260	1.5e-23	F:DNA binding; C:nucleus; P:transcription, DNA-templated; P:regulation of transcription, DNA-templated; P:response to hormone; P:auxin-activated signaling pathway	.	Tc00_g082420	2.46e-160	P:generation of precursor metabolites and energy; F:ion binding; P:cellular protein modification process; P:photosynthesis; C:protein complex; C:plastid; C:thylakoid	.	Tc00_g055680	1.6e-180	F:oxidoreductase activity; F:ion binding; C:cellular_component	.
Tc00_g027700	1.07e-98	F:ion binding; C:cellular_component	.	Tc00_g024360	1.54e-50	C:mitochondrion; F:ion binding; P:transport	.	Tc00_g084520	0	P:transmembrane transport; C:integral component of membrane	.	Tc00_g055690	1.62e-141	F:oxidoreductase activity; F:ion binding; C:cellular_component	.
Tc00_g027710	4.59e-92	P:secondary metabolic process; F:oxidoreductase activity; F:ion binding; P:biosynthetic process; C:cellular_component; P:Response to stress	.	Tc00_g024630	0	F:nuclease activity; P:DNA metabolic process; C:cellular_component	.	Tc00_g084740	0	C:plastid	.	Tc00_g055780	5.55e-124	F:molecular_function; P:Response to stress	.
Tc00_g027930	0	F:transferase activity, transferring glycosyl groups; P:cellular protein modification process; C:Golgi apparatus; P:biosynthetic process	.	Tc00_g024851	0	F:nucleic acid binding; F:zinc ion binding; F:aspartic-type endopeptidase activity; P:proteolysis; P:DNA integration	.	Tc00_g084750	0	F:zinc ion binding	.	Tc00_g055920	0	P:carbohydrate metabolic process; P:catabolic process; F:lyase activity; F:ion binding; C:cellular_component	.
Tc00_g027931	1.9e-96	F:nucleic acid binding; P:DNA metabolic process	.	Tc00_g024940	0	P:signal transduction; C:cellular_component; F:molecular_function; P:Response to stress	.	Tc00_g085971	6.12e-146	P:biological_process; C:cellular_component; F:molecular_function	.	Tc00_g055960	2.5e-151	C:cellular_component; P:transport; F:molecular_function	.
Tc00_g027970	1.8e-30	C:integral component of membrane	.	Tc00_g025380	0	F:molecular_function	.	Tc00_g087770	0	C:cellular_component; P:transport; F:molecular_function	.	Tc00_g055990	2.7e-145	C:peroxisome; P:signal transduction; F:cytoskeletal protein binding	.
Tc00_g028070	0	C:nucleus; F:DNA binding; P:cellular nitrogen compound metabolic process; P:biosynthetic process	.	Tc00_g025450	1.87e-27	F:oxidoreductase activity; F:ion binding	.	Tc00_g088700	0	C:plasmodesma; P:mitotic chromosome condensation; C:condensin complex	.	Tc00_g057640	3.76e-177	C:cellular_component	.
Tc00_g028080	6.7e-69	F:DNA binding; C:nucleus; P:transcription, DNA-templated; P:regulation of transcription, DNA-templated	.	Tc00_g025500	0	P:carbohydrate metabolic process; F:lyase activity	.	Tc00_g090040	0	P:carbohydrate metabolic process; F:transferase activity, transferring glycosyl groups; P:generation of precursor metabolites and energy; F:ion binding; P:biosynthetic process; F:hydrolase activity, acting on glycosyl bonds	.	Tc00_g057730	0	P:catabolic process; F:peptidase activity	.
Tc00_g028150	0	P:cellular protein modification process; C:cellular_component; F:kinase activity	.	Tc00_g025750	0	P:glutamine metabolic process; C:cytosol; F:transferase activity; F:hydrolase activity	.	Tc00_g090600	0	F:transmembrane transporter activity; P:signal transduction; P:homeostatic process; C:endoplasmic reticulum; C:plasma membrane	.	Tc00_g057950	0	P:catabolic process; P:cellular protein modification process; C:protein complex; C:intracellular; F:ligase activity	.
Tc00_g028361	0	F:ion binding	.	Tc00_g026320	0	F:molecular_function; P:Response to stress	.	Tc00_g091830	0	C:cellular_component; F:ligase activity	.	Tc00_g058860	0	P:lipid metabolic process; C:plastid; F:molecular_function	.
Tc00_g028370	1e-71	F:zinc ion binding; C:membrane	.	Tc00_g026340	2.3e-161	C:nucleus; F:DNA binding; P:transcription, DNA-templated; P:regulation of transcription, DNA-templated	.	Tc00_g092120	1.07e-166	F:DNA binding; P:cellular nitrogen compound metabolic process; P:biosynthetic process	.	Tc00_g059580	0	C:cellular_component; F:kinase activity	.
Tc00_g029080	0	P:lignin catabolic process; F:copper ion binding; C:apoplast; P:oxidation-reduction process; F:hydroquinone:oxygen oxidoreductase activity	.	Tc00_g026360	0	F:transferase activity, transferring acyl groups; F:oxidoreductase activity	.	Tc00_g092260	3.66e-141	C:plasma membrane; F:molecular_function	.	Tc00_g060790	0	P:Cell division; P:cellular protein modification process; F:kinase activity	.
Tc00_g029340	0	P:transmembrane transport; C:cellular_component	.	Tc00_g026380	0	F:pyridoxal phosphate binding; P:glutamate metabolic process; F:glutamate decarboxylase activity	.	Tc00_g092270	0	C:endosome; F:transmembrane transporter activity; C:Golgi apparatus; C:vacuole; C:plastid	.	Tc00_g061020	0	C:cellular_component	.
Tc00_g030260	4.2e-10	F:nucleic acid binding transcription factor activity; P:cellular protein modification process; P:anatomical structure development; F:peptidase activity; P:cellular nitrogen compound metabolic process; P:biosynthetic process; C:cellular_component; F:kinase activity	.	Tc00_g026580	2.64e-87	F:ubiquitin-protein transferase activity; C:nucleus; C:Cul3-RING ubiquitin ligase complex; P:response to red light; P:protein ubiquitination	.	Tc00_g092280	5.48e-165	P:carbohydrate metabolic process; C:cytoplasm; F:lyase activity	.	Tc00_g061270	0	F:oxidoreductase activity; P:cellular protein modification process; C:cellular_component; F:kinase activity	.
Tc00_g030540	2.8e-94	C:integral component of membrane; P:cell wall organization; C:plasma membrane	.	Tc00_g026640	1.75e-24	C:membrane; C:integral component of membrane	.	Tc00_g093800	1.4e-52	F:organic cyclic compound binding; F:heterocyclic compound binding; P:metabolic process; C:intracellular part; P:cellular process	.	Tc00_g061571	0	F:kinase activity	.
Tc00_g030670	8.5e-50	C:nucleus; F:DNA binding; F:transcription factor activity, sequence-specific DNA binding; P:transcription, DNA-templated; P:regulation of transcription, DNA-templated	.	Tc00_g027050	0	F:ion binding; P:cellular protein modification process; C:cellular_component; F:kinase activity	.	Tc01_g000090	0	C:cell wall; F:peptidase activity	.	Tc00_g063230	0	P:cytoskeleton organization; F:cytoskeletal protein binding; P:Response to stress	.
Tc00_g030680	1.23e-31	C:nucleus; F:DNA binding; F:nucleic acid binding transcription factor activity; P:cellular nitrogen compound metabolic process; P:biosynthetic process	.	Tc00_g027110	0	P:signal transduction; F:ion binding; P:cellular protein modification process; F:kinase activity; C:plasma membrane	.	Tc01_g000600	0	C:nucleus	.	Tc00_g063320	1.91e-08	C:cellular_component	.
Tc00_g030730	1.02e-123	C:nucleus; F:DNA binding; F:nucleic acid binding transcription factor activity; P:cellular nitrogen compound metabolic process; P:biosynthetic process	.	Tc00_g027240	3.8e-44	F:nucleotide binding; F:ATP binding; C:membrane; C:integral component of membrane; F:protein kinase activity; P:phosphorylation; F:transferase activity; F:protein serine/threonine kinase activity; F:carbohydrate binding; P:protein phosphorylation; F:kinase activity; C:plasma membrane	.	Tc01_g000900	0	C:mitochondrion; P:protein transport	.	Tc00_g063330	0	P:carbohydrate metabolic process; P:catabolic process; F:hydrolase activity, acting on glycosyl bonds	.
Tc00_g030740	0	F:transmembrane transporter activity; C:plasma membrane	.	Tc00_g027250	2.21e-153	C:nucleus; F:DNA binding; F:nucleic acid binding transcription factor activity; P:cellular nitrogen compound metabolic process; P:biosynthetic process	.	Tc01_g001130	0	P:metabolic process; F:ligase activity	.	Tc00_g064600	0	F:oxidoreductase activity; F:ion binding	.
Tc00_g030780	0	F:DNA binding	.	Tc00_g027540	2.06e-92	C:nucleus; F:DNA binding; P:cellular nitrogen compound metabolic process; P:biosynthetic process	.	Tc01_g001240	2.78e-165	F:DNA binding; F:nucleic acid binding transcription factor activity; P:cellular nitrogen compound metabolic process; P:biosynthetic process	.	Tc00_g065260	0	C:cellular_component	.
Tc00_g030850	0	F:nutrient reservoir activity	.	Tc00_g027643	0	F:nucleic acid binding; F:zinc ion binding; P:DNA integration	.	Tc01_g001420	1.13e-180	F:oxidoreductase activity; C:cellular_component; P:Response to stress	.	Tc00_g065830	1.7e-62	C:integral component of membrane	.
Tc00_g030860	0	C:cellular_component; P:transport	.	Tc00_g027670	0	P:cellular protein modification process; C:cellular_component; F:kinase activity; P:reproduction	.	Tc01_g001610	0	P:generation of precursor metabolites and energy; F:RNA binding; F:oxidoreductase activity; P:photosynthesis; C:extracellular region; C:plastid; C:thylakoid	.	Tc00_g066880	3.49e-169	P:generation of precursor metabolites and energy; F:ion binding; P:cellular protein modification process; P:photosynthesis; C:protein complex; C:plastid; C:thylakoid	.
Tc00_g031490	0	F:transmembrane transporter activity; C:mitochondrion; C:plasma membrane	.	Tc00_g027700	1.4e-84	F:zinc ion binding; C:membrane; P:cellular protein metabolic process	.	Tc01_g001730	0	C:membrane; P:metabolic process; F:isomerase activity	.	Tc00_g066950	0	F:molecular_function	.
Tc00_g031820	0	P:carbohydrate metabolic process; P:catabolic process; F:lyase activity; F:ion binding	.	Tc00_g027710	3e-72	P:defense response to other organism; F:iron ion binding; C:membrane; P:secondary metabolite biosynthetic process; F:oxidoreductase activity, acting on paired donors, with incorporation or reduction of molecular oxygen, NAD(P)H as one donor, and incorporation of one atom of oxygen; P:oxidation-reduction process; F:heme binding	.	Tc01_g002030	0	P:cellular protein modification process; F:kinase activity; C:plasma membrane	.	Tc00_g067090	0	C:integral component of membrane	.
Tc00_g031870	5.85e-171	C:nucleus	.	Tc00_g027780	0	F:molecular_function	.	Tc01_g002220	0	F:oxidoreductase activity; F:kinase activity	.	Tc00_g069960	0	C:nucleus; F:methyltransferase activity; P:DNA metabolic process	.
Tc00_g032610	0	C:cell wall; F:peptidase activity	.	Tc00_g027930	0	F:transferase activity, transferring glycosyl groups; P:cellular protein modification process; C:Golgi apparatus; P:biosynthetic process	.	Tc01_g003250	0	P:vesicle-mediated transport; C:protein complex; C:intracellular	.	Tc00_g070070	3.15e-77	P:carbohydrate metabolic process; C:cellular_component; F:hydrolase activity, acting on glycosyl bonds	.
Tc00_g032630	6.8e-61	P:cellular transition metal ion homeostasis; F:transition metal ion binding; C:cytoplasm; P:metal ion transport	.	Tc00_g027931	1.9e-96	F:nucleic acid binding; P:DNA metabolic process	.	Tc01_g004130	0	P:secondary metabolic process; C:nucleus; F:DNA binding; F:oxidoreductase activity; F:ion binding; P:cellular nitrogen compound metabolic process; P:biosynthetic process	.	Tc00_g071640	2.03e-60	F:molecular_function	.
Tc00_g032690	0	F:molecular_function	.	Tc00_g027970	1.8e-30	C:integral component of membrane	.	Tc01_g004140	0	C:nucleus; F:DNA binding; F:oxidoreductase activity; F:ion binding; P:cellular nitrogen compound metabolic process; P:biosynthetic process	.	Tc00_g071720	0	F:oxidoreductase activity; P:anatomical structure development; C:cellular_component; F:kinase activity	.
Tc00_g033030	0	F:oxidoreductase activity; F:ion binding	.	Tc00_g028070	0	C:nucleus; F:DNA binding; P:transcription, DNA-templated; P:regulation of transcription, DNA-templated	.	Tc01_g004240	3.9e-102	F:DNA binding; P:regulation of transcription, DNA-templated	.	Tc00_g072060	0	P:small molecule metabolic process; F:methyltransferase activity; P:biosynthetic process	.
Tc00_g033650	0	F:structural constituent of ribosome; C:ribosome; P:translation	.	Tc00_g028080	6.7e-69	F:DNA binding; C:nucleus; P:transcription, DNA-templated; P:regulation of transcription, DNA-templated	.	Tc01_g004810	0	P:catabolic process; P:lipid metabolic process; F:molecular_function	.	Tc00_g072760	6.97e-117	F:peptidase activity; C:cellular_component	.
Tc00_g033690	1.86e-57	C:nucleus; F:DNA binding; P:cellular nitrogen compound metabolic process; P:biosynthetic process	.	Tc00_g028220	0	F:transcription factor activity, sequence-specific DNA binding; P:transcription, DNA-templated; P:regulation of transcription, DNA-templated; F:sequence-specific DNA binding	.	Tc01_g004960	0	P:cell death; F:oxidoreductase activity; P:catabolic process; C:mitochondrion; P:cofactor metabolic process; F:ion binding; C:cytosol; P:cellular nitrogen compound metabolic process; C:plastid; P:Response to stress; P:immune system process	.	Tc00_g072770	0	F:molecular_function; P:Response to stress	.
Tc00_g033850	0	F:ATP binding; F:protein serine/threonine kinase activity; P:protein phosphorylation	.	Tc00_g028361	0	F:ion binding	.	Tc01_g005180	1.79e-65	C:cellular_component; F:signal transducer activity	.	Tc00_g073230	0	C:extracellular region; F:molecular_function	.
Tc00_g034230	0	F:ion binding; P:cellular protein modification process; F:kinase activity	.	Tc00_g028370	1e-71	F:zinc ion binding; C:membrane	.	Tc01_g005270	0	F:DNA binding	.	Tc00_g075270	0	C:cytoskeleton	.
Tc00_g034510	0	C:nucleus; F:DNA binding; P:anatomical structure development; P:Cell differentiation; P:cell wall organization or biogenesis; P:cellular nitrogen compound metabolic process; P:biosynthetic process	.	Tc00_g028910	7.3e-83	F:transferase activity, transferring glycosyl groups; C:membrane; P:metabolic process	.	Tc01_g005340	0	F:transferase activity, transferring acyl groups	.	Tc00_g078670	0	F:metal ion binding	.
Tc00_g035520	2.66e-155	C:nucleus; F:DNA binding; P:cellular nitrogen compound metabolic process; P:biosynthetic process	.	Tc00_g029080	0	P:lignin catabolic process; F:copper ion binding; C:apoplast; P:oxidation-reduction process; F:hydroquinone:oxygen oxidoreductase activity	.	Tc01_g005670	0	C:cell wall; C:spindle; P:thigmotropism; C:nucleolus; C:phragmoplast; F:microtubule binding	.	Tc00_g079080	4.4e-179	P:transmembrane transport; F:transmembrane transporter activity; C:integral component of membrane; C:plasma membrane	.
Tc00_g035750	0	C:cytosol	.	Tc00_g029340	0	P:transmembrane transport; C:cellular_component	.	Tc01_g005810	0	P:cellular protein modification process; C:cellular_component; F:kinase activity	.	Tc00_g079990	0	F:molecular_function	.
Tc00_g036580	0	F:oxidoreductase activity; F:ion binding; P:cellular protein modification process	.	Tc00_g030260	4.2e-10	F:nucleic acid binding transcription factor activity; P:cellular protein modification process; P:anatomical structure development; F:peptidase activity; P:cellular nitrogen compound metabolic process; P:biosynthetic process; C:cellular_component; F:kinase activity	.	Tc01_g006160	0	C:cell wall; F:peptidase activity	.	Tc00_g080190	0	F:oxidoreductase activity; F:ion binding	.
Tc00_g037020	0	F:ion binding; F:peptidase activity; C:extracellular region	.	Tc00_g030420	0	C:cellular_component	.	Tc01_g006280	0	F:oxidoreductase activity; P:catabolic process; F:ion binding; C:extracellular region; P:Response to stress	.	Tc00_g081050	3.64e-108	P:cellular protein modification process; C:cellular_component; F:kinase activity	.
Tc00_g037160	0	C:integral component of membrane	.	Tc00_g030540	2.8e-94	C:integral component of membrane; P:cell wall organization; C:plasma membrane	.	Tc01_g006310	1.27e-53	F:hydrolase activity, acting on carbon-nitrogen (but not peptide) bonds, in linear amides; F:formamidase activity; F:hydrolase activity	.	Tc00_g081080	0	P:cellular protein modification process; C:cellular_component; F:kinase activity	.
Tc00_g037190	0	F:transferase activity, transferring glycosyl groups	.	Tc00_g030670	8.5e-50	C:nucleus; F:DNA binding; F:transcription factor activity, sequence-specific DNA binding; P:transcription, DNA-templated; P:regulation of transcription, DNA-templated	.	Tc01_g006320	5.06e-45	F:hydrolase activity, acting on carbon-nitrogen (but not peptide) bonds	.	Tc00_g081210	0	P:cellular protein modification process; C:cellular_component; F:kinase activity	.
Tc00_g037210	0	P:embryo development; F:helicase activity; P:transport; C:plastid; P:reproduction	.	Tc00_g030680	2.2e-31	C:nucleus; F:DNA binding; F:transcription factor activity, sequence-specific DNA binding; P:transcription, DNA-templated; P:regulation of transcription, DNA-templated	.	Tc01_g006730	0	F:peptidase activity; C:cellular_component	.	Tc00_g081350	0	P:carbohydrate metabolic process; P:catabolic process; C:cellular_component; F:hydrolase activity, acting on glycosyl bonds	.
Tc00_g037360	3.14e-35	F:DNA binding; F:ion binding; P:DNA metabolic process	.	Tc00_g030730	1.02e-123	C:nucleus; F:DNA binding; F:nucleic acid binding transcription factor activity; P:cellular nitrogen compound metabolic process; P:biosynthetic process	.	Tc01_g006930	6.05e-164	C:cellular_component	.	Tc00_g081470	0	P:carbohydrate metabolic process; F:transferase activity, transferring glycosyl groups; C:Golgi apparatus; P:cell wall organization or biogenesis; P:biosynthetic process	.
Tc00_g037530	5.39e-69	C:integral component of membrane	.	Tc00_g030780	0	F:DNA binding	.	Tc01_g006960	0	F:oxidoreductase activity; C:cellular_component	.	Tc00_g081720	0	F:oxidoreductase activity; F:ligase activity	.
Tc00_g037970	7.08e-39	F:nucleic acid binding; C:nucleus; F:aspartic-type endopeptidase activity; P:proteolysis; P:DNA integration	.	Tc00_g031490	0	F:transmembrane transporter activity; C:mitochondrion; C:plasma membrane	.	Tc01_g007220	0	P:cellular protein modification process; C:cellular_component; F:kinase activity	.	Tc00_g082000	2.1e-169	F:lipid binding	.
Tc00_g038020	0	F:ion binding	.	Tc00_g031870	4.9e-170	C:nucleus	.	Tc01_g007370	0	F:ion binding	.	Tc00_g082400	0	F:ATPase activity; F:helicase activity; P:cellular nitrogen compound metabolic process; C:plastid	.
Tc00_g038280	4.66e-158	F:oxidoreductase activity; C:cytosol; P:Response to stress; P:immune system process	.	Tc00_g032610	0	C:cell wall; F:peptidase activity	.	Tc01_g007420	0	F:DNA binding	.	Tc00_g084520	0	P:transmembrane transport; C:integral component of membrane	.
Tc00_g038750	0	C:nucleus; C:cytosol	.	Tc00_g032630	3.69e-63	C:cytoplasm; P:homeostatic process; F:ion binding; P:transport	.	Tc01_g007530	0	P:cofactor metabolic process; F:ion binding; P:cellular amino acid metabolic process; F:methyltransferase activity	.	Tc00_g084740	0	C:plastid	.
Tc00_g039750	0	P:transport; C:intracellular	.	Tc00_g032690	0	F:molecular_function	.	Tc01_g007780	0	F:RNA binding; F:methyltransferase activity; P:cellular nitrogen compound metabolic process	.	Tc00_g085770	1.31e-104	F:peptidase activity	.
Tc00_g040502	0	F:zinc ion binding	.	Tc00_g033030	0	F:copper ion binding; F:oxidoreductase activity; P:oxidation-reduction process	.	Tc01_g007930	0	C:nucleus; F:DNA binding; F:nucleic acid binding transcription factor activity; P:anatomical structure development; P:cellular nitrogen compound metabolic process; P:biosynthetic process	.	Tc00_g085980	0	F:oxidoreductase activity; P:lipid metabolic process; P:biosynthetic process	.
Tc00_g041440	0	P:biological_process; C:plastid; F:ligase activity	.	Tc00_g033650	0	F:structural constituent of ribosome; C:ribosome; P:translation	.	Tc01_g008160	0	C:ribosome	.	Tc00_g087280	0	F:RNA binding; F:methyltransferase activity; P:cellular nitrogen compound metabolic process	.
Tc00_g041450	1.44e-142	P:secondary metabolic process; P:sulfur compound metabolic process; C:cytoplasm; P:catabolic process; P:cellular nitrogen compound metabolic process; F:transferase activity, transferring alkyl or aryl (other than methyl) groups	.	Tc00_g033850	0	F:ATP binding; F:protein serine/threonine kinase activity; P:protein phosphorylation	.	Tc01_g008180	0	C:nucleus	.	Tc00_g087760	7.14e-137	F:oxidoreductase activity	.
Tc00_g041460	5.62e-161	P:secondary metabolic process; P:sulfur compound metabolic process; C:cytoplasm; P:catabolic process; F:lyase activity; P:cellular nitrogen compound metabolic process; F:transferase activity, transferring alkyl or aryl (other than methyl) groups	.	Tc00_g034230	0	F:ion binding; P:cellular protein modification process; F:kinase activity	.	Tc01_g008680	0	P:biological_process; C:plastid; F:molecular_function	.	Tc00_g087770	0	C:cellular_component; P:transport; F:molecular_function	.
Tc00_g042311	0	F:nucleic acid binding; P:RNA phosphodiester bond hydrolysis, endonucleolytic; F:RNA-DNA hybrid ribonuclease activity; F:RNA-directed DNA polymerase activity; P:RNA-dependent DNA biosynthetic process	.	Tc00_g034510	0	C:nucleus; F:DNA binding; P:anatomical structure development; P:Cell differentiation; P:cell wall organization or biogenesis; P:cellular nitrogen compound metabolic process; P:biosynthetic process	.	Tc01_g008700	0	P:flavonoid glucuronidation; F:quercetin 3-O-glucosyltransferase activity; C:intracellular membrane-bounded organelle; F:quercetin 7-O-glucosyltransferase activity; P:flavonoid biosynthetic process	.	Tc00_g087900	0	C:nucleus; F:DNA binding; P:cellular nitrogen compound metabolic process; P:biosynthetic process	.
Tc00_g042770	6.55e-46	F:DNA binding; C:nucleus; F:transcription factor activity, sequence-specific DNA binding; P:transcription, DNA-templated; P:regulation of transcription, DNA-templated	.	Tc00_g035520	2.66e-155	C:nucleus; F:DNA binding; P:cellular nitrogen compound metabolic process; P:biosynthetic process	.	Tc01_g008800	0	P:defense response to other organism; F:iron ion binding; P:secondary metabolite biosynthetic process; C:integral component of membrane; F:oxidoreductase activity, acting on paired donors, with incorporation or reduction of molecular oxygen, NAD(P)H as one donor, and incorporation of one atom of oxygen; C:endoplasmic reticulum; P:oxidation-reduction process; F:heme binding	.	Tc00_g088120	5.7e-35	P:metabolic process; F:transferase activity	.
Tc00_g043710	0	P:DNA metabolic process; P:Response to stress; F:hydrolase activity, acting on glycosyl bonds	.	Tc00_g036580	0	F:oxidoreductase activity; F:ion binding; P:cellular protein modification process	.	Tc01_g009310	0	P:cell morphogenesis; P:lipid metabolic process; P:Cell differentiation; P:developmental maturation; F:molecular_function; P:growth	.	Tc00_g088700	0	C:plasmodesma; P:mitotic chromosome condensation; C:condensin complex	.
Tc00_g044150	9.7e-141	C:cellular_component; F:kinase activity	.	Tc00_g037020	0	F:ion binding; F:peptidase activity; C:extracellular region	.	Tc01_g009520	2.6e-93	P:cellular transition metal ion homeostasis; F:transition metal ion binding; C:cytoplasm; P:metal ion transport	.	Tc00_g089630	0	F:ATPase activity; P:small molecule metabolic process; F:transmembrane transporter activity; P:homeostatic process; F:ion binding; P:cellular nitrogen compound metabolic process; P:biosynthetic process; C:organelle; C:plasma membrane; C:intracellular	.
Tc00_g044370	3.1e-180	C:nucleus; F:DNA binding; P:transcription, DNA-templated; P:regulation of transcription, DNA-templated	.	Tc00_g037160	0	C:integral component of membrane	.	Tc01_g010150	0	F:ATPase activity; C:cellular_component	.	Tc00_g090600	0	F:transmembrane transporter activity; P:signal transduction; P:homeostatic process; C:endoplasmic reticulum; C:plasma membrane	.
Tc00_g044830	2.31e-68	C:nucleus; F:DNA binding; P:cellular nitrogen compound metabolic process; P:biosynthetic process	.	Tc00_g037190	0	F:transferase activity, transferring glycosyl groups	.	Tc01_g010390	0	P:cytoskeleton organization; P:signal transduction; P:cellular component assembly; P:cellular protein modification process; P:anatomical structure formation involved in morphogenesis; F:lipid binding; C:plasma membrane; P:reproduction; C:endosome; P:cell death; P:extracellular matrix organization; P:Cell differentiation; F:kinase activity	.	Tc00_g091830	0	C:cellular_component; F:ligase activity	.
Tc00_g044880	0	F:oxidoreductase activity; C:cellular_component	.	Tc00_g037360	3.14e-35	F:DNA binding; F:ion binding; P:DNA metabolic process	.	Tc01_g010580	0	P:carbohydrate metabolic process; F:transferase activity, transferring glycosyl groups; F:ion binding; P:cell wall organization or biogenesis; P:biosynthetic process; C:plasma membrane	.	Tc00_g092120	1.07e-166	F:DNA binding; P:cellular nitrogen compound metabolic process; P:biosynthetic process	.
Tc00_g044900	0	F:oxidoreductase activity; C:cellular_component	.	Tc00_g038020	0	F:zinc ion binding	.	Tc01_g012090	1.52e-105	F:hydrolase activity, acting on carbon-nitrogen (but not peptide) bonds; C:nucleus; F:DNA binding; P:cellular protein modification process; C:cytosol; P:cellular nitrogen compound metabolic process; P:biosynthetic process; F:cytoskeletal protein binding; C:plastid; F:enzyme binding	.	Tc00_g092260	3.66e-141	C:plasma membrane; F:molecular_function	.
Tc00_g044910	1.03e-69	F:oxidoreductase activity; C:cellular_component	.	Tc00_g038280	4.66e-158	F:oxidoreductase activity; C:cytosol; P:Response to stress; P:immune system process	.	Tc01_g012100	0	F:ATP binding; F:ATPase activity, coupled to transmembrane movement of substances; P:transmembrane transport; P:metabolic process; C:integral component of membrane; C:plasma membrane	.	Tc00_g093800	1.67e-52	P:biological_process; C:intracellular; F:molecular_function	.
Tc00_g044970	0	F:oxidoreductase activity, acting on CH-OH group of donors; F:flavin adenine dinucleotide binding; C:integral component of membrane; P:oxidation-reduction process	.	Tc00_g039650	0	F:phosphatase activity; F:ion binding	.	Tc01_g012700	0	P:carbohydrate metabolic process; C:cell wall; P:anatomical structure development; P:cell wall organization or biogenesis; P:biosynthetic process; C:extracellular region; C:vacuole; P:reproduction; F:hydrolase activity, acting on glycosyl bonds	.	Tc01_g000090	0	C:cell wall; F:peptidase activity	.
Tc00_g044980	2.04e-11	F:oxidoreductase activity; C:cellular_component	.	Tc00_g039750	0	P:transport; C:intracellular	.	Tc01_g013020	2.28e-44	F:kinase activity	.	Tc01_g000260	0	F:structural constituent of ribosome; C:cellular_component; P:transport; P:translation	.
Tc00_g044981	0	F:nucleic acid binding; C:membrane; C:integral component of membrane; P:DNA integration; P:glutamine metabolic process; P:phosphorylation; F:kinase activity; F:hydrolase activity	.	Tc00_g040060	0	P:cellular nitrogen compound metabolic process; P:biosynthetic process	.	Tc01_g013170	0	C:cellular_component; F:molecular_function	.	Tc01_g000360	0	F:transmembrane transporter activity; C:cellular_component; F:signal transducer activity; P:Response to stress; P:immune system process	.
Tc00_g044990	0	F:oxidoreductase activity, acting on CH-OH group of donors; F:flavin adenine dinucleotide binding; C:integral component of membrane; P:oxidation-reduction process	.	Tc00_g040502	5.3e-173	F:binding	.	Tc01_g013330	0	F:oxidoreductase activity; P:catabolic process; C:cell wall; F:ion binding; P:cell wall organization or biogenesis; C:extracellular region; P:Response to stress	.	Tc01_g000600	0	C:nucleus	.
Tc00_g045220	4.3e-87	P:cell death; C:cellular_component; P:Response to stress; P:immune system process	.	Tc00_g041440	0	P:biological_process; C:plastid; F:ligase activity	.	Tc01_g014990	0	F:molecular_function	.	Tc01_g000660	0	P:biological_process; F:ligase activity	.
Tc00_g045230	0	P:cell death; C:cellular_component; P:transport; F:molecular_function; P:Response to stress; P:immune system process	.	Tc00_g041450	2.6e-112	P:toxin catabolic process; C:cytoplasm; P:glutathione metabolic process; F:glutathione transferase activity	.	Tc01_g015000	0	F:oxidoreductase activity; C:plastid; C:thylakoid	.	Tc01_g000810	0	C:nucleus; F:DNA binding; P:cellular nitrogen compound metabolic process; P:biosynthetic process	.
Tc00_g045390	0	F:molecular_function	.	Tc00_g041460	5.62e-161	P:secondary metabolic process; P:sulfur compound metabolic process; C:cytoplasm; P:catabolic process; F:lyase activity; P:cellular nitrogen compound metabolic process; F:transferase activity, transferring alkyl or aryl (other than methyl) groups	.	Tc01_g015050	0	F:ion binding; P:photosynthesis; C:protein complex; C:thylakoid	.	Tc01_g000900	0	C:mitochondrion; P:transport	.
Tc00_g045400	0	F:peroxidase activity; P:response to oxidative stress; F:metal ion binding; P:cellular oxidant detoxification; P:oxidation-reduction process; C:extracellular region; F:heme binding; P:hydrogen peroxide catabolic process	.	Tc00_g042311	0	F:nucleic acid binding; P:RNA phosphodiester bond hydrolysis, endonucleolytic; F:RNA-DNA hybrid ribonuclease activity; F:RNA-directed DNA polymerase activity; P:RNA-dependent DNA biosynthetic process	.	Tc01_g015100	0	C:cellular_component; F:molecular_function	.	Tc01_g001130	0	P:metabolic process; F:ligase activity	.
Tc00_g045440	0	F:oxidoreductase activity; P:catabolic process; F:ion binding; C:extracellular region; P:Response to stress	.	Tc00_g042620	0	F:zinc ion binding	.	Tc01_g015990	0	F:oxidoreductase activity; F:ion binding; F:lyase activity; C:plastid	.	Tc01_g001160	0	F:peptidase activity	.
Tc00_g045690	1.3e-34	F:guiding stereospecific synthesis activity; C:membrane; P:regulation of catalytic activity; C:integral component of membrane; P:phenylpropanoid biosynthetic process	.	Tc00_g043310	0	P:metabolic process; F:hydrolase activity	.	Tc01_g016160	0	F:transmembrane transporter activity; C:cellular_component	.	Tc01_g001240	2.78e-165	F:DNA binding; F:nucleic acid binding transcription factor activity; P:cellular nitrogen compound metabolic process; P:biosynthetic process	.
Tc00_g045790	1.23e-169	F:ion binding	.	Tc00_g043700	2e-32	F:GTP binding; F:translation initiation factor activity; F:translation elongation factor activity; F:GTPase activity; P:proteolysis; F:peptidase activity; P:translational initiation; P:translational elongation	.	Tc01_g016220	0	F:oxidoreductase activity; C:plastid	.	Tc01_g001470	0	P:anatomical structure development; P:cellular protein modification process; P:developmental maturation; F:kinase activity; F:signal transducer activity; C:intracellular; P:Response to stress; P:reproduction	.
Tc00_g045850	0	C:nucleus; P:cell death; C:cytoplasm; P:catabolic process; F:ion binding; P:anatomical structure development; P:cellular protein modification process; F:ligase activity	.	Tc00_g043710	0	P:DNA metabolic process; P:Response to stress; F:hydrolase activity, acting on glycosyl bonds	.	Tc01_g016230	1.01e-116	F:oxidoreductase activity	.	Tc01_g001610	0	P:generation of precursor metabolites and energy; F:RNA binding; F:oxidoreductase activity; P:photosynthesis; C:extracellular region; C:plastid; C:thylakoid	.
Tc00_g045920	0	C:nucleus; F:DNA binding; F:nucleic acid binding transcription factor activity; P:cellular nitrogen compound metabolic process; P:biosynthetic process	.	Tc00_g043900	6.1e-11	F:hydrolase activity	.	Tc01_g016330	0	C:cellular_component; P:transport; F:molecular_function	.	Tc01_g001730	0	C:membrane; P:metabolic process; F:isomerase activity	.
Tc00_g046242	1.45e-94	F:nucleic acid binding; F:zinc ion binding; P:DNA integration; P:phosphorylation; F:kinase activity	.	Tc00_g044150	8.2e-141	C:integral component of membrane; P:phosphorylation; F:kinase activity	.	Tc01_g016780	0	C:integral component of membrane; P:oxidation-reduction process	.	Tc01_g002030	0	P:cellular protein modification process; F:kinase activity; C:plasma membrane	.
Tc00_g046250	2.3e-156	C:integral component of membrane; F:cellulose synthase (UDP-forming) activity; P:cellulose biosynthetic process; P:cell wall organization	.	Tc00_g044370	3.1e-180	C:nucleus; F:DNA binding; P:transcription, DNA-templated; P:regulation of transcription, DNA-templated	.	Tc01_g016790	1.51e-127	F:methyltransferase activity; C:plastid; C:thylakoid	.	Tc01_g002070	8.07e-136	C:nucleus; F:transcription factor activity, protein binding; F:ion binding; P:anatomical structure development; P:cellular nitrogen compound metabolic process; P:biosynthetic process	.
Tc00_g046440	0	P:carbohydrate metabolic process; F:ion binding; P:cellular protein modification process; C:Golgi apparatus; C:endoplasmic reticulum; P:biosynthetic process; F:hydrolase activity, acting on glycosyl bonds	.	Tc00_g044830	2.31e-68	C:nucleus; F:DNA binding; P:cellular nitrogen compound metabolic process; P:biosynthetic process	.	Tc01_g016800	0	P:lipid metabolic process; F:molecular_function	.	Tc01_g002090	0	P:small molecule metabolic process; P:carbohydrate metabolic process; P:generation of precursor metabolites and energy; P:catabolic process; P:cofactor metabolic process; F:lyase activity; P:cellular nitrogen compound metabolic process	.
Tc00_g046920	0	F:oxidoreductase activity	.	Tc00_g044880	0	F:oxidoreductase activity, acting on CH-OH group of donors; F:flavin adenine dinucleotide binding; C:integral component of membrane; P:oxidation-reduction process	.	Tc01_g017350	0	F:DNA binding; P:biosynthetic process; P:DNA metabolic process	.	Tc01_g002220	0	F:oxidoreductase activity; F:kinase activity	.
Tc00_g047110	9.11e-154	F:peptidase activity	.	Tc00_g044890	7.59e-161	F:oxidoreductase activity; C:cellular_component	.	Tc01_g017550	3.87e-71	F:nucleic acid binding; F:zinc ion binding; F:metal ion binding; C:mitochondrion; C:membrane; C:integral component of membrane; P:DNA integration; C:cytoplasmic, membrane-bounded vesicle	.	Tc01_g002860	1.17e-148	F:methyltransferase activity; C:cellular_component	.
Tc00_g047190	0	P:biological_process; C:plasma membrane	.	Tc00_g044900	0	F:oxidoreductase activity; C:cellular_component	.	Tc01_g017590	0	P:transmembrane transport; C:cellular_component; F:molecular_function	.	Tc01_g002990	0	C:plastid; F:molecular_function	.
Tc00_g047270	8.45e-108	C:nucleus; F:DNA binding; F:nucleic acid binding transcription factor activity; P:Cell differentiation; P:anatomical structure development; P:cellular nitrogen compound metabolic process; P:biosynthetic process; P:Response to stress	.	Tc00_g044910	1.03e-69	F:oxidoreductase activity; C:cellular_component	.	Tc01_g017650	0	P:carbohydrate metabolic process; C:plasma membrane; F:hydrolase activity, acting on glycosyl bonds	.	Tc01_g003250	0	P:vesicle-mediated transport; C:protein complex; C:intracellular	.
Tc00_g047441	0	F:molecular_function	.	Tc00_g044970	0	F:oxidoreductase activity; C:cellular_component	.	Tc01_g018570	0	F:metal ion binding; F:pigment binding; C:photosystem II; C:chloroplast envelope; C:integral component of membrane; C:photosystem I; P:protein-chromophore linkage; F:chlorophyll binding; C:plastoglobule; P:response to light stimulus; P:photosynthesis, light harvesting in photosystem I; C:chloroplast thylakoid membrane	.	Tc01_g003340	0	F:DNA binding; F:helicase activity	.
Tc00_g047660	0	C:cellular_component; F:molecular_function	.	Tc00_g044980	2.04e-11	F:oxidoreductase activity; C:cellular_component	.	Tc01_g018610	0	F:RNA binding; F:ion binding	.	Tc01_g003990	0	P:generation of precursor metabolites and energy; F:ion binding; P:photosynthesis; C:protein complex; C:thylakoid	.
Tc00_g047710	4.09e-66	C:ribosome	.	Tc00_g044990	0	F:oxidoreductase activity, acting on CH-OH group of donors; F:flavin adenine dinucleotide binding; C:integral component of membrane; P:oxidation-reduction process	.	Tc01_g019010	0	C:vacuole; C:plasma membrane	.	Tc01_g004130	0	P:secondary metabolic process; C:nucleus; F:DNA binding; F:oxidoreductase activity; F:ion binding; P:cellular nitrogen compound metabolic process; P:biosynthetic process	.
Tc00_g047720	0	P:signal transduction; P:cellular protein modification process; F:kinase activity; C:plasma membrane	.	Tc00_g045090	2.27e-162	C:cellular_component	.	Tc01_g019030	0	C:nucleus; C:cytosol	.	Tc01_g004140	0	C:nucleus; F:DNA binding; F:oxidoreductase activity; F:ion binding; P:cellular nitrogen compound metabolic process; P:biosynthetic process	.
Tc00_g047730	2.12e-174	F:kinase activity	.	Tc00_g045220	4.3e-87	P:cell death; C:cellular_component; P:Response to stress; P:immune system process	.	Tc01_g019540	0	F:transcription factor activity, sequence-specific DNA binding; P:regulation of transcription, DNA-templated; F:sequence-specific DNA binding	.	Tc01_g004240	3.9e-102	F:DNA binding; P:regulation of transcription, DNA-templated	.
Tc00_g047740	1.38e-179	F:kinase activity	.	Tc00_g045230	0	P:cell death; C:cellular_component; P:transport; F:molecular_function; P:Response to stress; P:immune system process	.	Tc01_g019660	6.03e-176	P:generation of precursor metabolites and energy; F:ion binding; P:cellular protein modification process; P:photosynthesis; C:protein complex; C:plastid; C:thylakoid	.	Tc01_g004960	0	P:cell death; F:oxidoreductase activity; P:catabolic process; C:mitochondrion; P:cofactor metabolic process; F:ion binding; C:cytosol; P:cellular nitrogen compound metabolic process; C:plastid; P:Response to stress; P:immune system process	.
Tc00_g047990	0	P:cell death; P:signal transduction; P:cellular protein modification process; C:plasma membrane; P:Response to stress; P:immune system process	.	Tc00_g045390	0	F:molecular_function	.	Tc01_g019860	0	P:carbohydrate metabolic process; F:nucleotidyltransferase activity; P:generation of precursor metabolites and energy; P:anatomical structure development; C:protein complex; P:biosynthetic process; C:extracellular region; C:plastid; P:reproduction	.	Tc01_g005120	0	P:lipid metabolic process; F:molecular_function	.
Tc00_g048250	4.8e-121	F:DNA binding	.	Tc00_g045400	0	F:peroxidase activity; P:response to oxidative stress; F:metal ion binding; P:cellular oxidant detoxification; P:oxidation-reduction process; C:extracellular region; F:heme binding; P:hydrogen peroxide catabolic process	.	Tc01_g019970	8.18e-90	F:helicase activity	.	Tc01_g005180	1.79e-65	C:cellular_component; F:signal transducer activity	.
Tc00_g048370	2.69e-132	C:cellular_component	.	Tc00_g045630	0	F:peroxidase activity; P:response to oxidative stress; F:metal ion binding; P:cellular oxidant detoxification; P:oxidation-reduction process; C:extracellular region; F:heme binding; P:hydrogen peroxide catabolic process	.	Tc01_g020040	0	F:transmembrane transporter activity; C:plasma membrane; C:plastid	.	Tc01_g005210	0	C:cell wall; F:peptidase activity; C:extracellular region	.
Tc00_g048520	0	P:signal transduction; P:cellular protein modification process; C:cytosol; F:kinase activity	.	Tc00_g045790	1e-169	F:metal ion binding	.	Tc01_g020432	6.21e-83	F:nucleic acid binding; F:zinc ion binding; P:DNA integration; P:phosphorylation; F:kinase activity	.	Tc01_g005270	0	F:DNA binding	.
Tc00_g048920	8.7e-74	C:integral component of membrane	.	Tc00_g045850	0	C:nucleus; P:cell death; C:cytoplasm; P:catabolic process; F:ion binding; P:anatomical structure development; P:cellular protein modification process; F:ligase activity	.	Tc01_g021550	4.67e-156	F:ligase activity	.	Tc01_g005340	0	F:transferase activity, transferring acyl groups	.
Tc00_g048960	0	F:oxidoreductase activity, acting on CH-OH group of donors; F:flavin adenine dinucleotide binding; F:lyase activity; P:oxidation-reduction process	.	Tc00_g045920	0	C:nucleus; F:DNA binding; F:nucleic acid binding transcription factor activity; P:cellular nitrogen compound metabolic process; P:biosynthetic process	.	Tc01_g022230	1.44e-29	C:cellular_component	.	Tc01_g005520	0	P:cellular protein modification process; C:cellular_component; F:kinase activity	.
Tc00_g049370	0	F:molecular_function	.	Tc00_g045940	0	F:oxidoreductase activity; P:catabolic process; F:ion binding; C:extracellular region; P:Response to stress	.	Tc01_g022390	0	C:plasma membrane	.	Tc01_g005670	0	C:cell wall; C:spindle; P:thigmotropism; C:nucleolus; C:phragmoplast; F:microtubule binding	.
Tc00_g049410	5.5e-77	F:DNA binding; C:nucleus; P:transcription, DNA-templated; P:regulation of transcription, DNA-templated	.	Tc00_g045950	0	C:membrane; C:integral component of membrane	.	Tc01_g022920	0	F:ATP binding; C:plasmodesma; C:integral component of membrane; F:protein kinase activity; P:protein phosphorylation; C:plasma membrane	.	Tc01_g005990	0	F:molecular_function	.
Tc00_g049510	2.9e-134	F:zinc ion binding; C:intracellular part; P:ubiquitin-dependent protein catabolic process; P:protein ubiquitination	.	Tc00_g046080	0	F:binding	.	Tc01_g025180	5e-95	P:petal development; C:nucleus; P:maintenance of shoot apical meristem identity; P:post-embryonic morphogenesis; P:specification of petal number; P:organ boundary specification between lateral organs and the meristem	.	Tc01_g006090	0.000329	C:membrane; C:integral component of membrane	.
Tc00_g049550	0	F:nucleotide binding; P:regulation of cellular process; F:protein serine/threonine kinase activity; P:protein phosphorylation; C:plasma membrane	.	Tc00_g046131	4e-114	F:nucleic acid binding; F:ATP binding; F:zinc ion binding; P:nitrogen compound metabolic process; C:integral component of membrane; F:protein kinase activity; P:protein phosphorylation	.	Tc01_g025580	0	F:oxidoreductase activity; C:cellular_component	.	Tc01_g006160	0	C:cell wall; F:peptidase activity	.
Tc00_g049810	0	P:biological_process; F:ion binding; F:lyase activity	.	Tc00_g046242	1.45e-94	F:nucleic acid binding; F:zinc ion binding; P:DNA integration; P:phosphorylation; F:kinase activity	.	Tc01_g025830	2.86e-175	F:phosphatase activity	.	Tc01_g006220	0	F:molecular_function	.
Tc00_g049850	3.8e-56	C:nucleus; F:DNA binding; P:transcription, DNA-templated; P:regulation of transcription, DNA-templated	.	Tc00_g046250	2.57e-158	P:carbohydrate metabolic process; F:transferase activity, transferring glycosyl groups; P:cell wall organization or biogenesis; P:biosynthetic process; C:cellular_component	.	Tc01_g026140	0	F:oxidoreductase activity; P:cellular protein modification process; P:anatomical structure development; F:signal transducer activity; F:kinase activity; C:intracellular	.	Tc01_g006320	5.06e-45	F:hydrolase activity, acting on carbon-nitrogen (but not peptide) bonds	.
Tc00_g049860	1.6e-49	C:nucleus; F:DNA binding; P:transcription, DNA-templated; P:regulation of transcription, DNA-templated	.	Tc00_g046440	0	P:carbohydrate metabolic process; F:ion binding; P:cellular protein modification process; C:Golgi apparatus; C:endoplasmic reticulum; P:biosynthetic process; F:hydrolase activity, acting on glycosyl bonds	.	Tc01_g026160	3.27e-133	P:photosynthesis; C:protein complex; C:thylakoid	.	Tc01_g006530	6.47e-105	F:isomerase activity	.
Tc00_g049890	1.9e-56	C:nucleus; F:DNA binding; P:transcription, DNA-templated; P:regulation of transcription, DNA-templated	.	Tc00_g046920	0	P:oxidation-reduction process; P:cellular metabolic process; P:organic substance metabolic process; F:fatty-acyl-CoA reductase (alcohol-forming) activity	.	Tc01_g026880	0	P:carbohydrate metabolic process; F:transferase activity, transferring glycosyl groups; C:cell wall; P:cell wall organization or biogenesis; C:extracellular region; F:hydrolase activity, acting on glycosyl bonds	.	Tc01_g006730	0	F:peptidase activity; C:cellular_component	.
Tc00_g049900	4.57e-52	C:nucleus; F:DNA binding; P:cellular nitrogen compound metabolic process; P:biosynthetic process	.	Tc00_g047110	7.7e-154	P:proteolysis; F:peptidase activity	.	Tc01_g027700	8.57e-113	C:cellular_component; F:molecular_function	.	Tc01_g006920	0	C:nucleus; F:DNA binding; F:transcription factor activity, sequence-specific DNA binding; P:transcription, DNA-templated; P:multicellular organism development; P:regulation of transcription, DNA-templated	.
Tc00_g050080	2e-87	F:DNA binding; C:nucleus; P:transcription, DNA-templated; C:membrane; C:integral component of membrane; P:regulation of transcription, DNA-templated	.	Tc00_g047120	0	C:cell wall; C:apoplast; P:cell wall organization; F:hydrolase activity, hydrolyzing O-glycosyl compounds; F:xyloglucan:xyloglucosyl transferase activity; P:xyloglucan metabolic process; P:cell wall biogenesis	.	Tc01_g027810	1.47e-135	P:photosynthesis; C:protein complex; C:plastid; C:thylakoid	.	Tc01_g006960	0	F:oxidoreductase activity; C:cellular_component	.
Tc00_g050090	0	C:nucleus; F:DNA binding; P:cellular nitrogen compound metabolic process; P:biosynthetic process	.	Tc00_g047190	0	C:integral component of membrane; P:oxidation-reduction process; C:plasma membrane	.	Tc01_g027860	1.18e-109	C:plastid	.	Tc01_g007220	0	P:cellular protein modification process; C:cellular_component; F:kinase activity	.
Tc00_g050100	1.7e-83	C:nucleus; F:DNA binding; P:cellular nitrogen compound metabolic process; P:biosynthetic process	.	Tc00_g047270	8.45e-108	C:nucleus; F:DNA binding; F:nucleic acid binding transcription factor activity; P:Cell differentiation; P:anatomical structure development; P:cellular nitrogen compound metabolic process; P:biosynthetic process; P:Response to stress	.	Tc01_g028260	0	P:cellular protein modification process; F:signal transducer activity; F:kinase activity; C:intracellular	.	Tc01_g007370	0	F:ion binding	.
Tc00_g050110	0	C:cellular_component	.	Tc00_g047380	8.88e-133	F:ion binding	.	Tc01_g028810	0	P:carbohydrate metabolic process; P:generation of precursor metabolites and energy; P:biosynthetic process; C:plastid; F:hydrolase activity, acting on glycosyl bonds	.	Tc01_g007420	0	F:DNA binding	.
Tc00_g050130	9.89e-177	C:cellular_component	.	Tc00_g047441	0	F:molecular_function	.	Tc01_g029540	1.28e-34	C:cellular_component	.	Tc01_g007530	0	P:cofactor metabolic process; F:ion binding; P:cellular amino acid metabolic process; F:methyltransferase activity	.
Tc00_g050140	1.2e-152	C:intracellular part	.	Tc00_g047660	0	F:nucleic acid binding; C:membrane	.	Tc01_g029550	0	C:nuclear envelope; F:cytoskeletal protein binding; C:vacuole; F:kinase activity	.	Tc01_g007870	0	F:UDP-glucosyltransferase activity; P:flavonoid metabolic process	.
Tc00_g050280	0	C:cellular_component; P:transport	.	Tc00_g047710	4.09e-66	C:ribosome	.	Tc01_g029920	0	F:ion binding	.	Tc01_g007930	0	C:nucleus; F:DNA binding; F:nucleic acid binding transcription factor activity; P:anatomical structure development; P:cellular nitrogen compound metabolic process; P:biosynthetic process	.
Tc00_g050490	2.23e-93	P:membrane organization; P:vesicle-mediated transport; C:cytoplasm; C:protein complex; F:molecular_function	.	Tc00_g047720	0	P:signal transduction; P:cellular protein modification process; F:kinase activity; C:plasma membrane	.	Tc01_g030030	0	P:cellular protein modification process; F:kinase activity	.	Tc01_g008160	0	C:ribosome	.
Tc00_g050760	5.51e-151	C:cellular_component	.	Tc00_g047730	2.12e-174	F:kinase activity	.	Tc01_g030070	2e-161	C:cytoplasm; P:glutathione metabolic process; C:integral component of membrane; F:glutathione transferase activity	.	Tc01_g008180	0	C:nucleus	.
Tc00_g050970	7.25e-33	F:nucleotidyltransferase activity; F:nuclease activity; F:ion binding; F:lipid binding; P:biosynthetic process; P:DNA metabolic process	.	Tc00_g047740	1.38e-179	F:kinase activity	.	Tc01_g030080	5.89e-159	P:sulfur compound metabolic process; P:cellular nitrogen compound metabolic process; C:plastid; F:transferase activity, transferring alkyl or aryl (other than methyl) groups	.	Tc01_g008660	8.39e-55	C:cellular_component	.
Tc00_g051510	0	C:nucleus; F:DNA binding; P:transcription, DNA-templated; C:integral component of membrane; P:regulation of transcription, DNA-templated; P:auxin-activated signaling pathway	.	Tc00_g047990	0	P:cell death; P:signal transduction; P:cellular protein modification process; C:plasma membrane; P:Response to stress; P:immune system process	.	Tc01_g030090	1.2e-158	C:cytoplasm; P:glutathione metabolic process; F:glutathione transferase activity	.	Tc01_g008700	0	P:biological_process; F:transferase activity, transferring glycosyl groups	.
Tc00_g051980	0	P:signal transduction; P:cellular protein modification process; C:cytosol; F:kinase activity	.	Tc00_g048250	1.03e-125	F:DNA binding	.	Tc01_g030230	0	P:generation of precursor metabolites and energy; P:protein complex assembly; P:photosynthesis; C:plastid	.	Tc01_g008990	6.19e-107	P:Response to stress	.
Tc00_g052431	0	F:zinc ion binding	.	Tc00_g048350	0	F:zinc ion binding	.	Tc01_g030460	0	P:biological_process; C:extracellular region; F:hydrolase activity, acting on glycosyl bonds	.	Tc01_g009060	0	C:endosome; C:Golgi apparatus	.
Tc00_g053480	4.6e-52	F:DNA binding; F:serine-type endopeptidase inhibitor activity; P:response to wounding; P:negative regulation of endopeptidase activity; F:protein dimerization activity	.	Tc00_g048370	2.3e-132	C:integral component of membrane	.	Tc01_g030490	0	P:carbohydrate metabolic process; F:hydrolase activity, acting on glycosyl bonds	.	Tc01_g009260	0	F:nucleotidyltransferase activity; P:cellular nitrogen compound metabolic process; P:biosynthetic process	.
Tc00_g054310	8.33e-174	C:cytoplasm; F:ion binding; F:peptidase activity	.	Tc00_g048520	0	P:signal transduction; P:cellular protein modification process; C:cytosol; F:kinase activity	.	Tc01_g030820	2.96e-134	P:RNA phosphodiester bond hydrolysis, endonucleolytic; F:nucleic acid binding; F:RNA-DNA hybrid ribonuclease activity	.	Tc01_g009320	9e-71	P:gluconeogenesis; P:glycolytic process; C:cytosol; F:2,3-bisphosphoglycerate-dependent phosphoglycerate mutase activity; P:regulation of pentose-phosphate shunt	.
Tc00_g054480	0	F:peroxidase activity; P:response to oxidative stress; F:metal ion binding; P:cellular oxidant detoxification; P:plant-type cell wall organization; P:oxidation-reduction process; C:extracellular region; C:plant-type cell wall; F:heme binding; P:hydrogen peroxide catabolic process	.	Tc00_g048920	8.7e-74	C:integral component of membrane	.	Tc01_g030880	0	P:carbohydrate metabolic process; P:catabolic process; F:hydrolase activity, acting on glycosyl bonds	.	Tc01_g009520	2.6e-93	P:cellular transition metal ion homeostasis; F:transition metal ion binding; C:cytoplasm; P:metal ion transport	.
Tc00_g054620	0	C:integral component of membrane	.	Tc00_g048960	0	F:oxidoreductase activity, acting on CH-OH group of donors; F:flavin adenine dinucleotide binding; F:lyase activity; P:oxidation-reduction process	.	Tc01_g031200	0	F:mannan synthase activity; P:response to salt stress; P:shoot system development; P:mannosylation; C:integral component of membrane; C:Golgi apparatus; F:cellulose synthase (UDP-forming) activity; P:cellulose biosynthetic process; P:cell wall organization; P:response to water deprivation	.	Tc01_g010300	0	F:ligase activity	.
Tc00_g055360	0	F:transferase activity, transferring acyl groups other than amino-acyl groups; P:metabolic process	.	Tc00_g049070	4.04e-20	F:ion binding; F:peptidase activity; C:cellular_component	.	Tc01_g031210	0	F:transferase activity, transferring glycosyl groups; C:cellular_component	.	Tc01_g010390	0	P:cytoskeleton organization; P:signal transduction; P:cellular component assembly; P:cellular protein modification process; P:anatomical structure formation involved in morphogenesis; F:lipid binding; C:plasma membrane; P:reproduction; C:endosome; P:cell death; P:extracellular matrix organization; P:Cell differentiation; F:kinase activity	.
Tc00_g056170	1.82e-57	P:anatomical structure development; C:protein complex; P:cellular nitrogen compound metabolic process; P:biosynthetic process; P:aging; P:Response to stress; C:nucleoplasm	.	Tc00_g049340	5.87e-119	P:carbohydrate metabolic process; F:transferase activity, transferring glycosyl groups; P:lipid metabolic process; F:ion binding; P:cellular protein modification process; C:cellular_component; F:kinase activity; P:Response to stress	.	Tc01_g031260	1.7e-90	C:nucleus; F:DNA binding; C:nucleosome; P:nucleosome assembly	.	Tc01_g010580	0	P:carbohydrate metabolic process; F:transferase activity, transferring glycosyl groups; F:ion binding; P:cell wall organization or biogenesis; P:biosynthetic process; C:plasma membrane	.
Tc00_g056830	0	P:cellular amino acid metabolic process; F:methyltransferase activity; P:biosynthetic process	.	Tc00_g049370	0	F:molecular_function	.	Tc01_g031320	0	F:ion binding; P:biosynthetic process	.	Tc01_g010800	1.95e-108	C:plasma membrane	.
Tc00_g057120	1.6e-51	F:nucleic acid binding; P:nucleic acid phosphodiester bond hydrolysis; P:cellular macromolecule metabolic process; F:endonuclease activity; C:membrane	.	Tc00_g049510	2.9e-134	F:zinc ion binding; C:intracellular part; P:ubiquitin-dependent protein catabolic process; P:protein ubiquitination	.	Tc01_g031400	2.2e-102	F:translation initiation factor activity; P:translational initiation	.	Tc01_g010950	0	C:cellular_component	.
Tc00_g057570	0	P:lipid metabolic process; P:biosynthetic process; F:isomerase activity	.	Tc00_g049550	0	F:nucleotide binding; P:regulation of cellular process; F:protein serine/threonine kinase activity; P:protein phosphorylation; C:plasma membrane	.	Tc01_g031460	0	F:DNA binding; C:cellular_component	.	Tc01_g011020	0	P:cellular protein modification process; F:kinase activity	.
Tc00_g058750	0	P:small molecule metabolic process; P:cofactor metabolic process; P:cellular nitrogen compound metabolic process; P:biosynthetic process; F:kinase activity	.	Tc00_g049600	0	C:cellular_component	.	Tc01_g031650	0	C:nucleus; F:DNA binding; C:cytoplasm; P:chromosome organization; F:helicase activity; C:protein complex; P:biosynthetic process; P:DNA metabolic process	.	Tc01_g011930	1.38e-93	P:photosynthesis; C:protein complex; C:thylakoid	.
Tc00_g058800	9.56e-151	C:cellular_component; F:molecular_function	.	Tc00_g049810	0	F:magnesium ion binding; P:metabolic process; F:terpene synthase activity	.	Tc01_g031680	6.28e-89	C:cellular_component	.	Tc01_g012090	1.52e-105	F:hydrolase activity, acting on carbon-nitrogen (but not peptide) bonds; C:nucleus; F:DNA binding; P:cellular protein modification process; C:cytosol; P:cellular nitrogen compound metabolic process; P:biosynthetic process; F:cytoskeletal protein binding; C:plastid; F:enzyme binding	.
Tc00_g059000	3.58e-32	C:cellular_component	.	Tc00_g049850	4.49e-56	C:nucleus; F:DNA binding; P:cellular nitrogen compound metabolic process; P:biosynthetic process	.	Tc01_g032280	3.39e-145	P:sulfur compound metabolic process; P:cofactor metabolic process; P:cellular component assembly; F:ion binding; P:biosynthetic process; C:plastid	.	Tc01_g012100	0	F:ATPase activity; F:transmembrane transporter activity; C:plasma membrane	.
Tc00_g059250	2.3e-154	P:cellular protein modification process; C:cellular_component; F:kinase activity	.	Tc00_g049860	1.85e-49	C:nucleus; F:DNA binding; P:cellular nitrogen compound metabolic process; P:biosynthetic process	.	Tc01_g032290	0	C:cellular_component	.	Tc01_g012450	0	P:cellular protein modification process; F:kinase activity; P:Response to stress	.
Tc00_g059340	0	C:cellular_component	.	Tc00_g049890	2.25e-56	C:nucleus; F:DNA binding; P:cellular nitrogen compound metabolic process; P:biosynthetic process	.	Tc01_g032440	0	F:transmembrane transporter activity; C:cellular_component	.	Tc01_g012570	0	C:nucleus; C:cytosol; C:chromosome; F:signal transducer activity	.
Tc00_g059450	0	C:protein complex; C:intracellular	.	Tc00_g050010	0	F:ATP binding; F:protein serine/threonine kinase activity; P:protein phosphorylation	.	Tc01_g032790	0	F:kinase activity	.	Tc01_g013040	0	P:catabolic process; F:peptidase activity	.
Tc00_g059460	0	C:nucleus; F:DNA binding; P:cell morphogenesis; P:Cell differentiation; P:reproduction	.	Tc00_g050050	5.05e-37	C:plastid	.	Tc01_g032900	0	F:ATPase activity; P:protein targeting; F:transmembrane transporter activity; P:cell morphogenesis; P:Cell differentiation; F:protein transporter activity; P:photosynthesis; C:plasma membrane; C:plastid; C:thylakoid	.	Tc01_g013170	0	C:cellular_component; F:molecular_function	.
Tc00_g059550	0	F:transmembrane transporter activity; C:cellular_component	.	Tc00_g050120	0	C:nucleus; C:cytoplasm	.	Tc01_g032960	1.16e-33	C:cytoplasmic, membrane-bounded vesicle	.	Tc01_g013330	0	F:oxidoreductase activity; P:catabolic process; C:cell wall; F:ion binding; P:cell wall organization or biogenesis; C:extracellular region; P:Response to stress	.
Tc00_g059570	0	F:galactinol-raffinose galactosyltransferase activity; P:metabolic process	.	Tc00_g050130	9.89e-177	C:cellular_component	.	Tc01_g033070	0	F:DNA binding	.	Tc01_g013530	0	C:endosome; C:Golgi apparatus; F:methyltransferase activity; C:vacuole	.
Tc00_g059700	2.23e-73	F:oxidoreductase activity	.	Tc00_g050180	1e-08	F:transferase activity, transferring acyl groups other than amino-acyl groups; P:metabolic process; F:peptidase activity; P:translational initiation; P:translational elongation; F:GTP binding; F:nucleic acid binding; F:translation initiation factor activity; C:nucleus; F:translation elongation factor activity; F:GTPase activity; P:proteolysis; F:transferase activity;	.	Tc01_g033090	0	C:cellular_component; F:molecular_function	.	Tc01_g013950	0	C:peroxisome	.
Tc00_g059820	0	F:oxidoreductase activity; F:ion binding; C:cellular_component	.	Tc00_g050490	2.23e-93	P:membrane organization; P:vesicle-mediated transport; C:cytoplasm; C:protein complex; F:molecular_function	.	Tc01_g033220	0	P:carbohydrate metabolic process; C:cellular_component; F:hydrolase activity, acting on glycosyl bonds	.	Tc01_g014030	0	P:carbohydrate metabolic process; C:plasma membrane; F:hydrolase activity, acting on glycosyl bonds	.
Tc00_g059890	0	P:cellular protein modification process; C:cellular_component; F:kinase activity	.	Tc00_g050760	5.51e-151	C:cellular_component	.	Tc01_g033600	3.1e-85	P:generation of precursor metabolites and energy; C:cytoplasmic chromosome; P:photosynthesis; C:protein complex; C:plastid; C:thylakoid	.	Tc01_g014331	0	F:ATPase activity; C:nucleus; P:chromosome organization; P:homeostatic process; C:mitochondrion; F:helicase activity; C:chromosome; P:biosynthetic process; P:DNA metabolic process; F:enzyme regulator activity; P:mitochondrion organization; P:Response to stress	.
Tc00_g060510	2.59e-179	C:cellular_component	.	Tc00_g050970	1.2e-32	F:nucleic acid binding; P:RNA phosphodiester bond hydrolysis, endonucleolytic; F:RNA-DNA hybrid ribonuclease activity; F:RNA-directed DNA polymerase activity; F:calcium ion binding; P:DNA integration; P:RNA-dependent DNA biosynthetic process; F:calcium-dependent phospholipid binding	.	Tc01_g033640	1.47e-142	C:plasma membrane	.	Tc01_g014820	0	P:carbohydrate metabolic process; F:transferase activity, transferring glycosyl groups; C:protein complex; P:biosynthetic process; C:plasma membrane	.
Tc00_g060780	0	F:nucleic acid binding; P:RNA phosphodiester bond hydrolysis, endonucleolytic; F:RNA-DNA hybrid ribonuclease activity; F:RNA-directed DNA polymerase activity; P:RNA-dependent DNA biosynthetic process	.	Tc00_g051510	0	C:nucleus; F:DNA binding; P:transcription, DNA-templated; C:integral component of membrane; P:regulation of transcription, DNA-templated; P:auxin-activated signaling pathway	.	Tc01_g033970	3.97e-67	P:biological_process	.	Tc01_g014990	0	F:molecular_function	.
Tc00_g060941	0	F:nucleotidyltransferase activity; F:nuclease activity; P:biosynthetic process; P:DNA metabolic process; C:cellular_component	.	Tc00_g051880	0	P:carbohydrate metabolic process; F:transferase activity, transferring glycosyl groups; F:phosphatase activity; P:biosynthetic process	.	Tc01_g034240	0	F:DNA binding	.	Tc01_g015000	0	F:oxidoreductase activity; C:plastid; C:thylakoid	.
Tc00_g061250	2.47e-151	C:membrane; C:integral component of membrane	.	Tc00_g052431	0	F:zinc ion binding; C:membrane; C:integral component of membrane	.	Tc01_g034530	3.73e-62	C:cellular_component	.	Tc01_g015100	0	C:cellular_component; F:molecular_function	.
Tc00_g061660	2.53e-37	F:DNA binding; F:nuclease activity; F:ion binding; C:cellular_component	.	Tc00_g053110	0	F:molecular_function	.	Tc01_g034650	0	P:generation of precursor metabolites and energy; P:catabolic process; P:photosynthesis; C:extracellular region; C:plastid; C:thylakoid; F:hydrolase activity, acting on glycosyl bonds	.	Tc01_g015131	2.49e-70	F:nucleic acid binding; F:zinc ion binding; P:DNA integration	.
Tc00_g061680	3.54e-68	P:cellular nitrogen compound metabolic process; F:molecular_function	.	Tc00_g053480	4.6e-52	F:DNA binding; F:serine-type endopeptidase inhibitor activity; P:response to wounding; P:negative regulation of endopeptidase activity; F:protein dimerization activity	.	Tc01_g034900	2.56e-120	C:cellular_component; F:ligase activity	.	Tc01_g015990	0	F:oxidoreductase activity; F:ion binding; F:lyase activity; C:plastid	.
Tc00_g061730	0	P:drug transmembrane transport; F:antiporter activity; C:integral component of membrane; F:drug transmembrane transporter activity	.	Tc00_g054140	0	C:nucleus; F:DNA binding; F:nucleic acid binding transcription factor activity; F:transcription factor binding; P:cellular nitrogen compound metabolic process; P:biosynthetic process	.	Tc01_g034940	0	C:cellular_component; F:molecular_function	.	Tc01_g016160	0	C:integral component of membrane; F:zinc ion transmembrane transporter activity; P:zinc II ion transmembrane transport	.
Tc00_g061970	4.96e-55	F:peptidase activity; C:cellular_component	.	Tc00_g054180	2.9e-105	F:transcription factor activity, sequence-specific DNA binding; P:transcription, DNA-templated; P:regulation of transcription, DNA-templated; F:sequence-specific DNA binding	.	Tc01_g035340	0	F:zinc ion binding	.	Tc01_g016220	0	F:oxidoreductase activity; C:plastid	.
Tc00_g062080	0	C:nucleus; F:DNA binding; F:nucleic acid binding transcription factor activity; C:protein complex; P:cellular nitrogen compound metabolic process; P:biosynthetic process	.	Tc00_g054290	0	P:carbohydrate metabolic process; C:cellular_component; F:hydrolase activity, acting on glycosyl bonds	.	Tc01_g035500	0	P:cellular protein modification process; F:signal transducer activity; F:kinase activity; C:intracellular	.	Tc01_g016780	0	C:integral component of membrane; P:oxidation-reduction process	.
Tc00_g062100	0	P:carbohydrate metabolic process; F:transferase activity, transferring glycosyl groups; C:Golgi apparatus; P:biosynthetic process	.	Tc00_g054310	8.33e-174	C:cytoplasm; F:ion binding; F:peptidase activity	.	Tc01_g035530	0	P:carbohydrate metabolic process; C:integral component of membrane; F:polygalacturonase activity; P:cell wall organization; C:extracellular region	.	Tc01_g016790	1.51e-127	F:methyltransferase activity; C:plastid; C:thylakoid	.
Tc00_g062193	0	F:ion binding; F:peptidase activity; P:DNA metabolic process	.	Tc00_g054480	0	F:peroxidase activity; P:response to oxidative stress; F:metal ion binding; P:cellular oxidant detoxification; P:plant-type cell wall organization; P:oxidation-reduction process; C:extracellular region; C:plant-type cell wall; F:heme binding; P:hydrogen peroxide catabolic process	.	Tc01_g035870	0	C:cellular_component; P:transport; F:molecular_function	.	Tc01_g016800	0	P:lipid metabolic process; F:hydrolase activity	.
Tc00_g063380	0	C:cellular_component	.	Tc00_g054620	0	C:cellular_component	.	Tc01_g036000	0	F:DNA binding; F:protein dimerization activity; P:trichome patterning	.	Tc01_g017350	0	F:DNA binding; P:biosynthetic process; P:DNA metabolic process	.
Tc00_g063450	0	F:nucleic acid binding; F:zinc ion binding; P:DNA integration	.	Tc00_g054630	0	C:integral component of membrane	.	Tc01_g036100	0	C:cellular_component	.	Tc01_g017530	0	P:carbohydrate metabolic process; F:transferase activity, transferring glycosyl groups; P:cell wall organization or biogenesis; P:biosynthetic process; C:cellular_component	.
Tc00_g063650	0	F:ion binding; F:peptidase activity	.	Tc00_g055360	0	F:transferase activity, transferring acyl groups other than amino-acyl groups; P:metabolic process	.	Tc01_g036150	0	F:DNA binding; C:cellular_component	.	Tc01_g017540	0	P:carbohydrate metabolic process; F:transferase activity, transferring glycosyl groups; P:cell wall organization or biogenesis; P:biosynthetic process; C:cellular_component	.
Tc00_g063690	1.15e-164	P:cellular protein modification process; F:kinase activity; C:plasma membrane; P:Response to stress; P:immune system process; P:reproduction; F:enzyme binding	.	Tc00_g056170	1.82e-57	P:anatomical structure development; C:protein complex; P:cellular nitrogen compound metabolic process; P:biosynthetic process; P:aging; P:Response to stress; C:nucleoplasm	.	Tc01_g037130	0	F:oxidoreductase activity	.	Tc01_g017590	0	P:transmembrane transport; C:cellular_component; F:molecular_function	.
Tc00_g063860	8.48e-150	P:secondary metabolic process; P:sulfur compound metabolic process; C:cytoplasm; P:catabolic process; P:cellular nitrogen compound metabolic process; F:transferase activity, transferring alkyl or aryl (other than methyl) groups	.	Tc00_g056490	1e-80	P:carbohydrate metabolic process; F:zinc ion binding; F:carbohydrate binding; F:isomerase activity	.	Tc01_g037150	0	F:oxidoreductase activity	.	Tc01_g017650	0	P:carbohydrate metabolic process; C:plasma membrane; F:hydrolase activity, acting on glycosyl bonds	.
Tc00_g064530	0	C:nucleus; P:transport; F:molecular_function	.	Tc00_g056830	0	P:cellular amino acid metabolic process; F:methyltransferase activity; P:biosynthetic process	.	Tc01_g037320	0	P:Cell division; C:microtubule organizing center; P:cytoskeleton organization; P:cellular protein modification process; C:nuclear chromosome; P:chromosome segregation; C:protein complex; F:kinase activity; P:Cell cycle	.	Tc01_g017870	0	F:molecular_function	.
Tc00_g064840	0	F:oxidoreductase activity; F:ion binding	.	Tc00_g057480	0	P:small molecule metabolic process; P:carbohydrate metabolic process; P:cofactor metabolic process; F:ion binding; C:endoplasmic reticulum; C:Golgi apparatus; P:cellular nitrogen compound metabolic process; C:vacuole; F:isomerase activity	.	Tc01_g037350	0	C:apoplast; P:metabolic process; C:integral component of membrane; C:plant-type cell wall; C:anchored component of plasma membrane; F:gamma-glutamyltransferase activity	.	Tc01_g018110	3.68e-111	C:plasma membrane; F:molecular_function	.
Tc00_g064970	0	P:cellular protein modification process; F:kinase activity	.	Tc00_g057570	0	P:lipid metabolic process; P:biosynthetic process; F:isomerase activity	.	Tc01_g037440	4.5e-115	F:ion binding	.	Tc01_g018240	0	C:membrane; C:integral component of membrane	.
Tc00_g065010	0	F:ATP binding; P:lipid transport; F:ATPase activity, coupled to transmembrane movement of substances; P:transmembrane transport; C:intracellular membrane-bounded organelle; P:metabolic process; C:integral component of membrane	.	Tc00_g058750	0	P:small molecule metabolic process; P:cofactor metabolic process; P:cellular nitrogen compound metabolic process; P:biosynthetic process; F:kinase activity	.	Tc01_g037530	0	F:DNA binding	.	Tc01_g018290	0	F:nuclease activity; P:tRNA metabolic process	.
Tc00_g065030	0	F:ATPase activity; C:cellular_component; P:transport	.	Tc00_g059000	3.58e-32	C:cellular_component	.	Tc01_g037840	0	P:embryo development; F:transferase activity, transferring acyl groups; C:mitochondrion; P:tRNA metabolic process; C:protein complex; F:peptidase activity; P:reproduction	.	Tc01_g018570	0	F:metal ion binding; F:pigment binding; C:photosystem II; C:chloroplast envelope; C:integral component of membrane; C:photosystem I; P:protein-chromophore linkage; F:chlorophyll binding; C:plastoglobule; P:response to light stimulus; P:photosynthesis, light harvesting in photosystem I; C:chloroplast thylakoid membrane	.
Tc00_g065230	0	C:integral component of membrane	.	Tc00_g059250	2.3e-154	P:cellular protein modification process; C:cellular_component; F:kinase activity	.	Tc01_g038090	0	P:Cell division; C:cytoplasm; P:chromosome segregation; F:cytoskeletal protein binding	.	Tc01_g018950	1.15e-137	C:cellular_component	.
Tc00_g065270	0	C:cellular_component	.	Tc00_g059330	0	F:mannan synthase activity; P:DNA mediated transformation; P:response to bacterium; P:mannosylation; C:integral component of membrane	.	Tc01_g038640	1e-127	C:nucleus; F:DNA binding; F:transcription factor activity, sequence-specific DNA binding; P:transcription, DNA-templated; P:regulation of transcription, DNA-templated	.	Tc01_g019010	0	C:integral component of membrane; C:vacuolar membrane; C:anchored component of plasma membrane	.
Tc00_g066060	2.1e-09	C:cellular_component	.	Tc00_g059340	0	C:cellular_component	.	Tc01_g038710	0	F:hydrolase activity	.	Tc01_g019030	0	C:nucleus; C:cytosol	.
Tc00_g068370	0	F:oxidoreductase activity; F:ion binding; C:cellular_component	.	Tc00_g059460	0	C:nucleus; F:DNA binding; P:cell morphogenesis; P:Cell differentiation; P:reproduction	.	Tc01_g039060	2.84e-174	F:phosphatase activity; C:cellular_component	.	Tc01_g019540	0	F:transcription factor activity, sequence-specific DNA binding; P:regulation of transcription, DNA-templated; F:sequence-specific DNA binding	.
Tc00_g068880	3.16e-20	C:cellular_component	.	Tc00_g059470	0	C:integral component of membrane; F:amino acid transmembrane transporter activity; C:plasma membrane; P:amino acid transmembrane transport	.	Tc01_g039350	4.46e-76	C:plasma membrane; F:molecular_function	.	Tc01_g019630	3.04e-75	C:plastid; C:thylakoid	.
Tc00_g068890	1.06e-31	C:cellular_component	.	Tc00_g059500	1.03e-93	C:cellular_component	.	Tc01_g039500	7.19e-144	F:DNA binding; F:nucleic acid binding transcription factor activity; P:cellular nitrogen compound metabolic process; P:biosynthetic process	.	Tc01_g019660	6.03e-176	P:generation of precursor metabolites and energy; F:ion binding; P:cellular protein modification process; P:photosynthesis; C:protein complex; C:plastid; C:thylakoid	.
Tc00_g068940	0	P:transmembrane transport; F:structural constituent of ribosome; C:cellular_component; P:translation	.	Tc00_g059550	0	F:transmembrane transporter activity; C:cellular_component	.	Tc01_g039930	5.15e-143	F:peptidase activity; C:cellular_component	.	Tc01_g019860	0	P:carbohydrate metabolic process; F:nucleotidyltransferase activity; P:generation of precursor metabolites and energy; P:anatomical structure development; C:protein complex; P:biosynthetic process; C:extracellular region; C:plastid; P:reproduction	.
Tc00_g069210	1.46e-59	F:zinc ion binding; F:oxidoreductase activity, acting on the CH-CH group of donors; C:cytoplasm; F:catalytic activity; P:oxidation-reduction process	.	Tc00_g059570	0	F:transferase activity, transferring glycosyl groups	.	Tc01_g040460	1.27e-89	C:cellular_component	.	Tc01_g020040	0	F:transmembrane transporter activity; C:plasma membrane; C:plastid	.
Tc00_g069570	7.32e-173	F:nuclease activity	.	Tc00_g059700	2.4e-71	F:oxidoreductase activity; F:binding	.	Tc01_g040590	2.5e-162	C:nucleus; F:lyase activity; C:cytosol; P:biosynthetic process; F:hydrolase activity, acting on glycosyl bonds	.	Tc01_g020060	0	F:oxidoreductase activity; C:cell wall; F:ion binding; C:plasma membrane	.
Tc00_g069900	6.8e-51	C:nucleus; F:DNA binding; P:transcription, DNA-templated; P:regulation of transcription, DNA-templated	.	Tc00_g059890	0	P:cellular protein modification process; C:cellular_component; F:kinase activity	.	Tc01_g040610	0	F:oxidoreductase activity; P:catabolic process; P:lipid metabolic process; C:Golgi apparatus; C:vacuole; C:plasma membrane	.	Tc01_g020360	6.6e-129	C:integral component of membrane; P:photosynthesis; C:photosystem I reaction center	.
Tc00_g071161	1.79e-125	P:biological_process	.	Tc00_g059930	0	C:plant-type cell wall	.	Tc01_g040720	0	F:transferase activity	.	Tc01_g020420	0	C:plastid; C:thylakoid	.
Tc00_g071540	0	F:ATPase activity; P:transport; C:plasma membrane	.	Tc00_g060510	7.3e-179	C:integral component of membrane	.	Tc01_g040910	1.33e-150	F:RNA binding; P:tRNA metabolic process; F:methyltransferase activity	.	Tc01_g020610	0	C:cellular_component	.
Tc00_g071670	1.36e-16	C:nucleus; C:cytoplasm; P:catabolic process; C:protein complex; F:peptidase activity	.	Tc00_g060780	0	F:nucleic acid binding; P:RNA phosphodiester bond hydrolysis, endonucleolytic; F:RNA-DNA hybrid ribonuclease activity; F:RNA-directed DNA polymerase activity; P:RNA-dependent DNA biosynthetic process	.	Tc02_g000060	0	C:nucleus; F:DNA binding; P:chromosome organization; F:helicase activity; C:protein complex; P:biosynthetic process; P:DNA metabolic process	.	Tc01_g021550	4.67e-156	F:ligase activity	.
Tc00_g071710	0	P:small molecule metabolic process; F:transferase activity, transferring glycosyl groups; P:biosynthetic process; C:organelle; C:intracellular	.	Tc00_g060941	0	F:nucleotidyltransferase activity; F:nuclease activity; P:biosynthetic process; P:DNA metabolic process; C:cellular_component	.	Tc02_g000080	1.59e-132	P:generation of precursor metabolites and energy; P:protein complex assembly; P:photosynthesis; C:plastid; P:Response to stress; C:thylakoid	.	Tc01_g021630	0	P:secondary metabolic process; F:oxidoreductase activity; P:lipid metabolic process; F:ion binding; P:biosynthetic process; C:cellular_component	.
Tc00_g071750	0	F:ATP binding; F:receptor signaling protein serine/threonine kinase activity; C:cytoplasm; P:signal transduction by protein phosphorylation	.	Tc00_g061250	2.47e-151	C:membrane; C:integral component of membrane	.	Tc02_g000330	0	P:biological_process; F:transferase activity, transferring glycosyl groups	.	Tc01_g021960	0	C:plasma membrane	.
Tc00_g072010	1.5e-142	P:cellular protein modification process; C:cellular_component; F:kinase activity	.	Tc00_g061660	2.53e-37	F:DNA binding; F:nuclease activity; F:ion binding; C:cellular_component	.	Tc02_g000380	0	F:transmembrane transporter activity; F:oxidoreductase activity; C:plasma membrane	.	Tc01_g022230	1.44e-29	C:cellular_component	.
Tc00_g072440	0	P:cellular protein modification process; F:molecular_function	.	Tc00_g061680	3e-68	F:nucleic acid binding; P:nucleic acid metabolic process	.	Tc02_g000750	6e-86	F:oxidoreductase activity	.	Tc01_g022390	0	C:plasma membrane	.
Tc00_g072460	0	F:ion binding; F:ligase activity	.	Tc00_g061730	0	F:transmembrane transporter activity; C:cellular_component	.	Tc02_g000960	1.06e-69	P:photosynthesis; C:protein complex; C:plastid; F:molecular_function; C:thylakoid	.	Tc01_g022920	0	P:cellular protein modification process; F:kinase activity; C:plasma membrane	.
Tc00_g072490	0	P:cellular protein modification process; C:cellular_component; F:kinase activity; P:reproduction	.	Tc00_g061780	0	P:cellular protein modification process; F:kinase activity; C:plasma membrane; P:reproduction	.	Tc02_g001340	0	F:oxidoreductase activity; C:intracellular	.	Tc01_g023200	0	P:embryo development; P:Cell proliferation; C:nucleus; F:DNA binding; P:chromosome organization; C:cytosol; F:helicase activity; C:protein complex; P:biosynthetic process; P:DNA metabolic process; P:reproduction; P:growth	.
Tc00_g072720	1.4e-118	P:negative regulation of catalytic activity; F:enzyme inhibitor activity	.	Tc00_g061970	4.96e-55	F:peptidase activity; C:cellular_component	.	Tc02_g001710	0	C:nucleus; F:methyltransferase activity	.	Tc01_g025180	5e-95	P:petal development; C:nucleus; P:maintenance of shoot apical meristem identity; P:post-embryonic morphogenesis; P:specification of petal number; P:organ boundary specification between lateral organs and the meristem	.
Tc00_g072830	2.11e-123	F:oxidoreductase activity; P:cellular nitrogen compound metabolic process; P:biosynthetic process	.	Tc00_g062100	0	P:carbohydrate metabolic process; F:transferase activity, transferring glycosyl groups; C:Golgi apparatus; P:biosynthetic process	.	Tc02_g002090	0	F:oxidoreductase activity; P:lipid metabolic process; F:ion binding; F:lyase activity	.	Tc01_g025580	0	F:oxidoreductase activity; C:cellular_component	.
Tc00_g072970	0	F:ATP binding; P:recognition of pollen; C:integral component of membrane; F:protein serine/threonine kinase activity; F:carbohydrate binding; P:protein phosphorylation; C:plasma membrane	.	Tc00_g062610	1.05e-88	F:kinase activity	.	Tc02_g002540	1.39e-116	F:oxidoreductase activity; C:cellular_component	.	Tc01_g025640	2.65e-138	C:cytoplasm; F:enzyme regulator activity	.
Tc00_g073150	0	P:cellular protein modification process; F:kinase activity	.	Tc00_g062930	2.6e-57	P:proteolysis; F:cysteine-type peptidase activity	.	Tc02_g002550	0	F:translation initiation factor activity; P:translational initiation	.	Tc01_g025670	0	C:nucleus; P:macromolecular complex assembly; F:ion binding; P:anatomical structure development; P:cellular protein modification process; C:protein complex; P:biosynthetic process; P:DNA metabolic process; P:Response to stress	.
Tc00_g073220	0	P:cellular protein modification process; F:kinase activity	.	Tc00_g063240	0	F:transmembrane transporter activity; P:homeostatic process; C:plasma membrane	.	Tc02_g002950	0	C:cellular_component	.	Tc01_g025770	0	P:carbohydrate metabolic process; F:transferase activity, transferring glycosyl groups; F:ion binding; P:cell wall organization or biogenesis; P:biosynthetic process; C:plasma membrane; P:Response to stress	.
Tc00_g073250	7.4e-66	C:nucleus; P:DNA replication; C:integral component of membrane	.	Tc00_g063380	0	C:cellular_component	.	Tc02_g002980	0	F:ion binding; P:protein maturation; F:peptidase activity; C:plastid	.	Tc01_g025830	2.86e-175	F:phosphatase activity	.
Tc00_g073290	2.5e-95	C:nucleus; F:DNA binding; P:transcription, DNA-templated; C:membrane; P:regulation of transcription, DNA-templated	.	Tc00_g063650	0	F:ion binding; F:peptidase activity	.	Tc02_g003220	0	P:embryo development; P:Cell division; C:nucleus; C:cytoskeleton; P:vesicle-mediated transport; P:chromosome organization; P:cell morphogenesis; P:chromosome segregation; F:peptidase activity; P:Cell cycle; P:reproduction; P:growth	.	Tc01_g025940	4.53e-179	P:locomotion; C:cell wall; P:symbiosis, encompassing mutualism through parasitism; P:transport	.
Tc00_g073300	0	C:nucleus; F:DNA binding; P:cellular nitrogen compound metabolic process; P:biosynthetic process	.	Tc00_g063690	3.2e-164	F:ATP binding; C:plasmodesma; F:ubiquitin protein ligase binding; P:recognition of pollen; P:innate immune response; C:integral component of membrane; F:protein serine/threonine kinase activity; P:protein phosphorylation; C:plasma membrane	.	Tc02_g003550	0	C:nucleus	.	Tc01_g026140	0	F:oxidoreductase activity; P:cellular protein modification process; P:anatomical structure development; F:signal transducer activity; F:kinase activity; C:intracellular	.
Tc00_g073310	4.97e-67	C:nucleus; F:DNA binding; P:cellular nitrogen compound metabolic process; P:biosynthetic process	.	Tc00_g063860	8.48e-150	P:secondary metabolic process; P:sulfur compound metabolic process; C:cytoplasm; P:catabolic process; P:cellular nitrogen compound metabolic process; F:transferase activity, transferring alkyl or aryl (other than methyl) groups	.	Tc02_g003800	0	F:translation initiation factor activity; P:translational initiation	.	Tc01_g026160	3.27e-133	P:photosynthesis; C:protein complex; C:thylakoid	.
Tc00_g073420	1.4e-87	C:integral component of membrane; P:phosphorylation; F:kinase activity	.	Tc00_g064412	0	F:nucleic acid binding	.	Tc02_g003850	0	F:translation factor activity, RNA binding	.	Tc01_g026430	0	F:oxidoreductase activity; F:ion binding	.
Tc00_g073450	0	C:integral component of membrane; P:phosphorylation; F:kinase activity	.	Tc00_g064500	0	P:small molecule metabolic process; P:secondary metabolic process; P:carbohydrate metabolic process; C:mitochondrion; P:cofactor metabolic process; P:cellular nitrogen compound metabolic process; P:biosynthetic process; C:plastid; F:molecular_function	.	Tc02_g003860	5.35e-62	F:translation factor activity, RNA binding	.	Tc01_g027010	4.92e-52	P:photosynthesis; C:protein complex; C:plastid; C:thylakoid	.
Tc00_g073721	1.81e-82	P:cellular amino acid metabolic process; P:DNA metabolic process; F:kinase activity	.	Tc00_g064530	0	C:nucleus; P:transport; F:molecular_function	.	Tc02_g003870	0	F:translation factor activity, RNA binding	.	Tc01_g027700	8.57e-113	C:cellular_component; F:molecular_function	.
Tc00_g073920	3.5e-179	F:oxidoreductase activity; F:metal ion binding; F:methyltransferase activity; P:oxidation-reduction process; P:methylation	.	Tc00_g064840	0	F:zinc ion binding; F:oxidoreductase activity; P:oxidation-reduction process	.	Tc02_g004380	0	P:biological_process; F:transferase activity, transferring glycosyl groups	.	Tc01_g027810	1.47e-135	P:photosynthesis; C:protein complex; C:plastid; C:thylakoid	.
Tc00_g075080	0	P:small molecule metabolic process; P:carbohydrate metabolic process; F:isomerase activity	.	Tc00_g064970	0	F:ATP binding; F:protein serine/threonine kinase activity; P:protein phosphorylation	.	Tc02_g004620	0	C:cellular_component	.	Tc01_g027860	1.18e-109	C:plastid	.
Tc00_g075330	0	F:phosphatase activity; P:cellular protein modification process	.	Tc00_g064990	0	P:hexose metabolic process; F:aldose 1-epimerase activity; F:carbohydrate binding	.	Tc02_g005190	0	C:integral component of membrane	.	Tc01_g028260	0	P:cellular protein modification process; F:signal transducer activity; F:kinase activity; C:intracellular	.
Tc00_g075680	0	F:nuclease activity	.	Tc00_g065010	0	F:ATP binding; P:lipid transport; F:ATPase activity, coupled to transmembrane movement of substances; P:transmembrane transport; C:intracellular membrane-bounded organelle; P:metabolic process; C:integral component of membrane	.	Tc02_g005270	0	P:lipid metabolic process; F:molecular_function	.	Tc01_g028800	0	C:cellular_component	.
Tc00_g075820	9.37e-08	P:DNA metabolic process; F:molecular_function	.	Tc00_g065030	0	F:ATPase activity; F:ATP binding; P:metabolic process; C:integral component of membrane; P:transport; F:transporter activity	.	Tc02_g005420	0	C:cellular_component; F:ligase activity	.	Tc01_g028810	0	P:carbohydrate metabolic process; P:generation of precursor metabolites and energy; P:biosynthetic process; C:plastid; F:hydrolase activity, acting on glycosyl bonds	.
Tc00_g075920	0	F:iron ion binding; P:secondary metabolite biosynthetic process; C:integral component of membrane; P:oxidation-reduction process; F:flavonoid 3',5'-hydroxylase activity; F:heme binding	.	Tc00_g065230	0	C:integral component of membrane	.	Tc02_g005800	0	P:biological_process; C:plastid	.	Tc01_g029190	0	F:oxidoreductase activity; F:kinase activity	.
Tc00_g076620	0	F:zinc ion binding	.	Tc00_g065270	0	C:cellular_component	.	Tc02_g006210	4.82e-115	P:biological_process; C:cellular_component	.	Tc01_g029540	4e-34	C:integral component of membrane	.
Tc00_g076740	0	F:transferase activity, transferring acyl groups	.	Tc00_g066060	2.1e-09	C:cellular_component	.	Tc02_g006620	3.11e-170	C:cellular_component	.	Tc01_g029550	0	C:nuclear envelope; F:cytoskeletal protein binding; C:vacuole; F:kinase activity	.
Tc00_g076910	0	F:lyase activity; C:cellular_component	.	Tc00_g066170	3.2e-09	F:zinc ion binding; F:protein kinase activity; F:peptidase activity; P:protein phosphorylation; F:nucleic acid binding; F:ATP binding; F:metal ion binding; P:proteolysis; C:membrane; C:integral component of membrane; P:phosphorylation; F:kinase activity; F:polysaccharide binding;	.	Tc02_g006860	0	F:molecular_function	.	Tc01_g029850	0	F:DNA binding; C:mitochondrion; P:cellular nitrogen compound metabolic process; P:biosynthetic process; C:plastid	.
Tc00_g077120	0	F:zinc ion binding	.	Tc00_g066890	5.1e-62	F:heat shock protein binding; C:integral component of membrane; F:unfolded protein binding	.	Tc02_g006990	0	F:DNA binding; C:mitochondrion; P:cellular nitrogen compound metabolic process; P:biosynthetic process; C:plastid	.	Tc01_g029920	0	F:ion binding	.
Tc00_g078070	0	C:integral component of membrane	.	Tc00_g068370	0	F:oxidoreductase activity; F:ion binding; C:cellular_component	.	Tc02_g007060	0	P:cellular protein modification process; C:cellular_component; F:kinase activity	.	Tc01_g030030	0	P:cellular protein modification process; F:kinase activity	.
Tc00_g078230	2.1e-132	F:ATP binding; C:membrane; C:integral component of membrane; F:protein kinase activity; P:phosphorylation; P:protein phosphorylation; F:kinase activity	.	Tc00_g068430	0	F:molecular_function; P:Response to stress	.	Tc02_g007200	0	F:oxidoreductase activity; P:cellular protein modification process; C:cellular_component; F:kinase activity	.	Tc01_g030070	2e-161	C:cytoplasm; P:glutathione metabolic process; C:integral component of membrane; F:glutathione transferase activity	.
Tc00_g078360	1.7e-57	C:integral component of membrane	.	Tc00_g068880	3.2e-19	C:integral component of membrane	.	Tc02_g007520	0	C:nucleus; F:DNA binding; P:chromosome organization; C:cytosol; F:helicase activity; C:protein complex; P:biosynthetic process; P:DNA metabolic process	.	Tc01_g030080	5.89e-159	P:sulfur compound metabolic process; P:cellular nitrogen compound metabolic process; C:plastid; F:transferase activity, transferring alkyl or aryl (other than methyl) groups	.
Tc00_g078450	7.2e-127	C:integral component of membrane	.	Tc00_g068890	9e-32	C:integral component of membrane	.	Tc02_g007580	0	P:carbohydrate metabolic process; C:cell wall; C:vacuole; F:hydrolase activity, acting on glycosyl bonds	.	Tc01_g030090	2.1e-159	P:sulfur compound metabolic process; C:cytoplasm; P:cellular nitrogen compound metabolic process; F:transferase activity, transferring alkyl or aryl (other than methyl) groups	.
Tc00_g078840	1.04e-162	F:kinase activity	.	Tc00_g068940	0	P:transmembrane transport; F:structural constituent of ribosome; C:cellular_component; P:translation	.	Tc02_g007930	5.46e-100	P:generation of precursor metabolites and energy; F:ion binding	.	Tc01_g030460	0	P:biological_process; C:extracellular region; F:hydrolase activity, acting on glycosyl bonds	.
Tc00_g078880	0	F:peptidase activity	.	Tc00_g069210	1.2e-59	F:ion binding	.	Tc02_g008150	0	C:nucleus; F:DNA binding; P:cellular nitrogen compound metabolic process; P:biosynthetic process	.	Tc01_g030490	0	P:carbohydrate metabolic process; F:hydrolase activity, acting on glycosyl bonds	.
Tc00_g078890	0	F:zinc ion binding	.	Tc00_g069570	7.32e-173	F:nuclease activity	.	Tc02_g008360	0	C:nucleus; F:DNA binding; P:cellular nitrogen compound metabolic process; P:biosynthetic process	.	Tc01_g030870	0	P:carbohydrate metabolic process; P:catabolic process; C:cell wall; P:cell wall organization or biogenesis; F:enzyme regulator activity	.
Tc00_g079260	0	C:cellular_component; F:molecular_function	.	Tc00_g069900	8.07e-51	C:nucleus; F:DNA binding; P:cellular nitrogen compound metabolic process; P:biosynthetic process	.	Tc02_g008610	0	P:metabolic process; F:hydrolase activity	.	Tc01_g030880	0	P:carbohydrate metabolic process; P:catabolic process; F:hydrolase activity, acting on glycosyl bonds	.
Tc00_g079710	0	P:lignin catabolic process; F:copper ion binding; C:apoplast; P:oxidation-reduction process; F:hydroquinone:oxygen oxidoreductase activity	.	Tc00_g070370	0	F:binding	.	Tc02_g008860	1.69e-79	C:cytoplasm; P:cellular amino acid metabolic process; C:organelle; F:molecular_function	.	Tc01_g031200	0	F:mannan synthase activity; P:response to salt stress; P:shoot system development; P:mannosylation; C:integral component of membrane; C:Golgi apparatus; F:cellulose synthase (UDP-forming) activity; P:cellulose biosynthetic process; P:cell wall organization; P:response to water deprivation	.
Tc00_g081380	0	C:nucleus; F:ATP binding; F:calmodulin binding; P:abscisic acid-activated signaling pathway; C:cytoplasm; F:calcium ion binding; P:protein autophosphorylation; F:calmodulin-dependent protein kinase activity; P:peptidyl-serine phosphorylation; C:plasma membrane; P:intracellular signal transduction; F:calcium-dependent protein serine/threonine kinase activity	.	Tc00_g071220	1.71e-30	C:cellular_component	.	Tc02_g009060	0	C:plasma membrane	.	Tc01_g031210	0	F:transferase activity, transferring glycosyl groups; C:cellular_component	.
Tc00_g081640	0	F:transferase activity, transferring glycosyl groups; P:cellular protein modification process; C:Golgi apparatus; P:biosynthetic process	.	Tc00_g071540	0	F:ATPase activity; P:transport; C:plasma membrane	.	Tc02_g009160	0	P:small molecule metabolic process; F:transferase activity, transferring glycosyl groups; P:biosynthetic process; C:organelle; C:intracellular	.	Tc01_g031260	1.7e-90	C:nucleus; F:DNA binding; C:nucleosome; P:nucleosome assembly	.
Tc00_g081730	4.8e-111	F:nucleic acid binding; P:DNA integration	.	Tc00_g071670	1.36e-16	C:nucleus; C:cytoplasm; P:catabolic process; C:protein complex; F:peptidase activity	.	Tc02_g009300	0	C:nucleus; C:membrane; P:G1/S transition of mitotic Cell cycle; P:seed development; P:response to cytokinin	.	Tc01_g031300	0	C:cellular_component; F:molecular_function	.
Tc00_g081890	9.46e-134	F:ion binding; F:peptidase activity	.	Tc00_g071710	0	P:small molecule metabolic process; F:transferase activity, transferring glycosyl groups; P:biosynthetic process; C:organelle; C:intracellular	.	Tc02_g009360	0	F:oxidoreductase activity; F:kinase activity	.	Tc01_g031320	0	F:ion binding; P:biosynthetic process	.
Tc00_g081891	0	F:nucleotidyltransferase activity; F:nuclease activity; P:biosynthetic process; P:DNA metabolic process	.	Tc00_g071750	0	F:ATP binding; F:receptor signaling protein serine/threonine kinase activity; C:cytoplasm; P:signal transduction by protein phosphorylation	.	Tc02_g009430	0	F:ATP binding; C:integral component of membrane; F:protein kinase activity; P:protein phosphorylation	.	Tc01_g031400	2.2e-102	F:translation initiation factor activity; P:translational initiation	.
Tc00_g082490	1.91e-68	C:cellular_component	.	Tc00_g072420	0	F:ATP binding; C:integral component of membrane; F:protein serine/threonine kinase activity; F:carbohydrate binding; P:protein phosphorylation	.	Tc02_g009540	0	P:small molecule metabolic process; F:transferase activity, transferring glycosyl groups; P:biosynthetic process; C:organelle; C:intracellular	.	Tc01_g031460	0	F:DNA binding; C:cellular_component	.
Tc00_g082770	3.73e-160	C:cellular_component	.	Tc00_g072440	0	F:ubiquitin-protein transferase activity; P:protein ubiquitination	.	Tc02_g010590	0	P:carbohydrate metabolic process; F:phosphatase activity	.	Tc01_g031530	0	P:xylan catabolic process; F:xylan 1,4-beta-xylosidase activity; F:alpha-L-arabinofuranosidase activity; P:arabinan catabolic process; F:beta-glucosidase activity; C:plant-type cell wall	.
Tc00_g082900	0	C:nucleus; F:DNA binding; F:nucleic acid binding transcription factor activity; P:cellular nitrogen compound metabolic process; P:biosynthetic process	.	Tc00_g072460	0	F:ion binding; F:ligase activity	.	Tc02_g012040	2.47e-177	P:generation of precursor metabolites and energy; F:ion binding; P:cellular protein modification process; P:photosynthesis; C:protein complex; C:plastid; C:thylakoid	.	Tc01_g031650	0	C:nucleus; F:DNA binding; C:cytoplasm; P:chromosome organization; F:helicase activity; C:protein complex; P:biosynthetic process; P:DNA metabolic process	.
Tc00_g083220	1.1e-63	F:ion binding; P:transport	.	Tc00_g072490	0	F:ATP binding; P:recognition of pollen; C:integral component of membrane; F:protein serine/threonine kinase activity; P:protein phosphorylation	.	Tc02_g012170	0	P:xylan catabolic process; F:xylan 1,4-beta-xylosidase activity; C:integral component of membrane; F:alpha-L-arabinofuranosidase activity; P:arabinan catabolic process; F:beta-glucosidase activity; C:plant-type cell wall	.	Tc01_g031680	6.28e-89	C:cellular_component	.
Tc00_g083270	1.8e-55	F:nucleotide binding; F:nucleic acid binding	.	Tc00_g072720	1.4e-118	P:negative regulation of catalytic activity; F:enzyme inhibitor activity	.	Tc02_g012390	0	F:methyltransferase activity; C:cellular_component	.	Tc01_g032280	3.39e-145	P:sulfur compound metabolic process; P:cofactor metabolic process; P:cellular component assembly; F:ion binding; P:biosynthetic process; C:plastid	.
Tc00_g083320	0	C:cellular_component; F:molecular_function	.	Tc00_g072820	0	F:DNA binding	.	Tc02_g012820	0	F:transmembrane transporter activity; C:cellular_component	.	Tc01_g032290	0	C:cellular_component	.
Tc00_g083773	1.62e-176	F:molecular_function	.	Tc00_g072830	2.11e-123	F:oxidoreductase activity; P:cellular nitrogen compound metabolic process; P:biosynthetic process	.	Tc02_g012850	0	C:plastid; F:molecular_function; C:thylakoid	.	Tc01_g032470	7.82e-70	P:Response to stress; P:immune system process	.
Tc00_g084530	0	C:nucleus; F:transcription factor activity, protein binding; F:ion binding; P:anatomical structure development; P:cellular nitrogen compound metabolic process; P:biosynthetic process	.	Tc00_g072970	0	P:cellular protein modification process; F:kinase activity; C:plasma membrane; P:reproduction	.	Tc02_g013140	0	P:cytoskeleton-dependent intracellular transport; P:cell morphogenesis; C:cilium; C:protein complex; F:ligase activity	.	Tc01_g032790	0	F:kinase activity	.
Tc00_g084630	0	F:lyase activity; P:cellular nitrogen compound metabolic process	.	Tc00_g073190	0	P:cellular protein modification process; F:kinase activity	.	Tc02_g013170	2.02e-62	C:nucleus; F:DNA binding; P:Cell differentiation; P:anatomical structure development	.	Tc01_g032920	0	P:carbohydrate metabolic process; F:lyase activity; P:cell wall organization or biogenesis; C:extracellular region; C:vacuole; F:hydrolase activity, acting on glycosyl bonds	.
Tc00_g084690	0	P:RNA phosphodiester bond hydrolysis, endonucleolytic; F:nucleic acid binding; F:RNA-DNA hybrid ribonuclease activity	.	Tc00_g073250	7.4e-66	C:nucleus; P:DNA replication; C:integral component of membrane	.	Tc02_g013600	0	F:transmembrane transporter activity; F:oxidoreductase activity; C:plasma membrane	.	Tc01_g032930	0	F:transferase activity, transferring acyl groups; F:ion binding; C:cellular_component	.
Tc00_g084700	1.42e-115	P:RNA phosphodiester bond hydrolysis, endonucleolytic; F:nucleic acid binding; F:RNA-DNA hybrid ribonuclease activity	.	Tc00_g073290	2.93e-95	C:nucleus; F:DNA binding; P:cellular nitrogen compound metabolic process; P:biosynthetic process	.	Tc02_g013860	0	F:serine-type carboxypeptidase activity; P:proteolysis involved in cellular protein catabolic process	.	Tc01_g032960	1.16e-33	C:cytoplasmic, membrane-bounded vesicle	.
Tc00_g086010	1.66e-10	F:ion binding	.	Tc00_g073300	0	C:nucleus; F:DNA binding; P:transcription, DNA-templated; C:integral component of membrane; P:regulation of transcription, DNA-templated	.	Tc02_g013980	0	P:carbohydrate metabolic process; P:catabolic process; F:hydrolase activity, acting on glycosyl bonds	.	Tc01_g033070	0	F:DNA binding	.
Tc00_g086050	1.16e-174	C:cellular_component	.	Tc00_g073310	4.2e-67	C:nucleus; F:DNA binding; P:transcription, DNA-templated; C:integral component of membrane; P:regulation of transcription, DNA-templated	.	Tc02_g014110	0	P:cellular protein modification process; C:cellular_component; F:kinase activity	.	Tc01_g033170	2.61e-154	P:small molecule metabolic process; F:oxidoreductase activity; C:cell wall; F:ion binding; F:lyase activity; P:anatomical structure development; C:extracellular region; P:transport; P:Response to stress	.
Tc00_g086270	0	C:cellular_component	.	Tc00_g073370	0	C:nucleus; F:DNA binding; P:transcription, DNA-templated; P:regulation of transcription, DNA-templated	.	Tc02_g014300	3.2e-84	P:phloem or xylem histogenesis; C:integral component of membrane; P:cotyledon vascular tissue pattern formation; P:leaf vascular tissue pattern formation	.	Tc01_g033220	0	P:carbohydrate metabolic process; C:cellular_component; F:hydrolase activity, acting on glycosyl bonds	.
Tc00_g087360	8.3e-128	C:membrane	.	Tc00_g073420	1.4e-87	C:integral component of membrane; P:phosphorylation; F:kinase activity	.	Tc02_g014350	0	C:nucleus; F:DNA binding; F:nucleic acid binding transcription factor activity; P:cellular nitrogen compound metabolic process; P:biosynthetic process	.	Tc01_g033600	3.1e-85	P:generation of precursor metabolites and energy; C:cytoplasmic chromosome; P:photosynthesis; C:protein complex; C:plastid; C:thylakoid	.
Tc00_g087950	0	P:biological_process; F:RNA binding; F:ion binding	.	Tc00_g073450	0	C:integral component of membrane; P:phosphorylation; F:kinase activity	.	Tc02_g014400	0	P:carbohydrate metabolic process; F:transferase activity, transferring glycosyl groups; C:cell wall; P:cell wall organization or biogenesis; C:extracellular region; F:hydrolase activity, acting on glycosyl bonds	.	Tc01_g033640	1.47e-142	C:plasma membrane	.
Tc00_g088580	0	F:nucleic acid binding; P:RNA phosphodiester bond hydrolysis, endonucleolytic; F:RNA-DNA hybrid ribonuclease activity	.	Tc00_g073480	1.91e-173	C:cellular_component; F:kinase activity	.	Tc02_g014740	5.6e-175	C:nucleus; P:Cell cycle	.	Tc01_g034020	0	P:secondary metabolic process; F:oxidoreductase activity; F:ion binding; P:biosynthetic process; C:cellular_component	.
Tc00_g088690	1.1e-166	F:aspartic-type endopeptidase activity; P:proteolysis	.	Tc00_g073920	3.5e-179	F:oxidoreductase activity; F:metal ion binding; F:methyltransferase activity; P:oxidation-reduction process; P:methylation	.	Tc02_g015070	1.24e-165	C:endoplasmic reticulum	.	Tc01_g034070	2.33e-174	C:nucleus; C:endosome; P:signal transduction; F:molecular_function	.
Tc00_g088810	0	F:prenyltransferase activity; C:integral component of membrane; P:ubiquinone biosynthetic process	.	Tc00_g073940	0	F:molecular_function; P:Response to stress	.	Tc02_g015760	0	F:molecular_function	.	Tc01_g034080	1.73e-155	P:ATP synthesis coupled proton transport; F:proton-transporting ATP synthase activity, rotational mechanism; F:hydrolase activity	.
Tc00_g089240	2.84e-103	P:vesicle-mediated transport; C:cellular_component	.	Tc00_g075000	0	P:carbohydrate metabolic process; F:transferase activity, transferring glycosyl groups; C:cell wall; P:cell wall organization or biogenesis; C:extracellular region; F:hydrolase activity, acting on glycosyl bonds	.	Tc02_g015770	0	P:peptidyl-tyrosine phosphorylation; F:non-membrane spanning protein tyrosine kinase activity; F:epoxide hydrolase activity	.	Tc01_g034240	0	F:DNA binding	.
Tc00_g089610	2e-155	P:nucleic acid metabolic process; P:cellular macromolecule metabolic process; F:catalytic activity	.	Tc00_g075080	0	P:small molecule metabolic process; P:carbohydrate metabolic process; F:isomerase activity	.	Tc02_g015780	0	F:molecular_function	.	Tc01_g034650	0	P:generation of precursor metabolites and energy; P:catabolic process; P:photosynthesis; C:extracellular region; C:plastid; C:thylakoid; F:hydrolase activity, acting on glycosyl bonds	.
Tc00_g090200	0	F:kinase activity	.	Tc00_g075330	0	F:phosphatase activity; P:cellular protein modification process	.	Tc02_g015820	0	P:transport	.	Tc01_g034900	2.7e-120	P:metabolic process; C:integral component of membrane; F:ligase activity	.
Tc00_g090850	0	F:molecular_function	.	Tc00_g075650	5.1e-49	F:organic cyclic compound binding; F:heterocyclic compound binding; C:integral component of membrane; F:ion binding; P:phosphorylation; F:kinase activity	.	Tc02_g016050	7.8e-59	F:GTP binding; F:nucleotide binding; F:GTPase activity; C:membrane	.	Tc01_g034940	0	C:cellular_component; F:molecular_function	.
Tc00_g090950	0	P:cellular protein modification process; C:protein complex; C:intracellular; F:molecular_function	.	Tc00_g075680	0	F:nuclease activity	.	Tc02_g016510	8.81e-128	C:nucleus; F:DNA binding	.	Tc01_g035500	0	P:cellular protein modification process; F:signal transducer activity; F:kinase activity; C:intracellular	.
Tc00_g091980	0	P:small molecule metabolic process; P:carbohydrate metabolic process; C:cytoplasm; F:oxidoreductase activity; P:catabolic process; F:ion binding	.	Tc00_g075920	0	F:iron ion binding; P:secondary metabolite biosynthetic process; C:integral component of membrane; P:oxidation-reduction process; F:flavonoid 3',5'-hydroxylase activity; F:heme binding	.	Tc02_g016540	0	C:spindle; P:activation of protein kinase activity; P:regulation of mitotic spindle organization; C:microtubule	.	Tc01_g035530	0	P:carbohydrate metabolic process; P:cell wall organization or biogenesis; C:extracellular region; F:hydrolase activity, acting on glycosyl bonds	.
Tc00_g092010	0	F:DNA binding	.	Tc00_g076050	1.2e-27	P:carbohydrate metabolic process; F:hydrolase activity, hydrolyzing O-glycosyl compounds	.	Tc02_g018320	2.8e-126	P:metabolic process; F:hydrolase activity	.	Tc01_g035870	0	C:cellular_component; P:transport; F:molecular_function	.
Tc00_g092430	3.3e-102	F:2-alkenal reductase [NAD(P)] activity; F:calcium ion binding; P:oxidation-reduction process	.	Tc00_g076620	0	F:zinc ion binding	.	Tc02_g018550	0	F:transmembrane transporter activity; P:anatomical structure development; P:aging; C:plasma membrane; P:Response to stress	.	Tc01_g035970	0	P:biological_process; F:molecular_function	.
Tc00_g092450	0	F:ATPase activity; F:transmembrane transporter activity; F:ion binding; C:organelle; C:plasma membrane; C:intracellular	.	Tc00_g076731	2.14e-71	F:molecular_function	.	Tc02_g019440	0	F:nucleotidyltransferase activity	.	Tc01_g036000	0	F:DNA binding; P:Cell differentiation; P:anatomical structure development; P:cell-cell signaling	.
Tc00_g092460	0	C:integral component of plasma membrane; F:ATP binding; F:metal ion binding; C:intracellular membrane-bounded organelle; P:metabolic process; P:calcium ion transmembrane transport; F:calcium-transporting ATPase activity	.	Tc00_g076740	0	F:transferase activity, transferring acyl groups	.	Tc02_g019480	0	F:ATPase activity; P:Cell division; P:membrane organization; P:generation of precursor metabolites and energy; P:catabolic process; C:mitochondrion; P:photosynthesis; F:peptidase activity; C:plastid; C:thylakoid	.	Tc01_g036100	0	C:cellular_component	.
Tc00_g094220	0	F:ion binding; F:peptidase activity; P:DNA metabolic process	.	Tc00_g076850	5.1e-161	F:nucleotide binding; F:metal ion binding; C:membrane	.	Tc02_g019700	0	F:ion binding; P:cellular amino acid metabolic process; P:biosynthetic process; F:kinase activity; C:plastid	.	Tc01_g036150	0	F:DNA binding; C:cellular_component	.
Tc00_g095810	5.67e-143	F:ion binding; P:DNA metabolic process; F:enzyme regulator activity	.	Tc00_g076910	0	F:lyase activity; C:cellular_component	.	Tc02_g020570	0	P:cellular protein modification process; C:cellular_component; F:kinase activity	.	Tc01_g036200	2.13e-125	C:cellular_component	.
Tc00_g096780	0	F:nucleotidyltransferase activity; F:nuclease activity; P:biosynthetic process; P:DNA metabolic process	.	Tc00_g077120	0	F:zinc ion binding	.	Tc02_g020960	0	F:ATP dimethylallyltransferase activity; C:mitochondrion; F:tRNA dimethylallyltransferase activity; F:ADP dimethylallyltransferase activity; P:tRNA modification	.	Tc01_g036320	1.31e-109	F:DNA binding	.
Tc01_g000310	0	P:transmembrane transport; C:cellular_component	.	Tc00_g078070	0	C:integral component of membrane	.	Tc02_g022140	1.98e-80	P:small molecule metabolic process; C:cell; F:oxidoreductase activity; P:homeostatic process	.	Tc01_g036760	0	F:oxidoreductase activity; F:ion binding	.
Tc01_g000340	0	F:nuclease activity; P:cellular protein modification process; P:mRNA processing; C:cellular_component; F:kinase activity	.	Tc00_g078230	2.1e-132	F:ATP binding; C:membrane; C:integral component of membrane; F:protein kinase activity; P:phosphorylation; P:protein phosphorylation; F:kinase activity	.	Tc02_g022520	0	F:kinase activity	.	Tc01_g036810	0	F:ligase activity	.
Tc01_g000540	0	P:cellular protein modification process; F:kinase activity; F:transferase activity, transferring alkyl or aryl (other than methyl) groups	.	Tc00_g078350	0	F:nucleic acid binding; F:zinc ion binding	.	Tc02_g023110	0	P:transmembrane transport; C:cellular_component; F:molecular_function	.	Tc01_g037130	0	F:oxidoreductase activity	.
Tc01_g000720	0	P:biological_process; C:cellular_component; F:molecular_function	.	Tc00_g078360	1.7e-57	C:integral component of membrane	.	Tc02_g023360	0	P:carbohydrate metabolic process; F:transferase activity, transferring acyl groups; C:Golgi apparatus; P:cell wall organization or biogenesis	.	Tc01_g037140	0	F:oxidoreductase activity	.
Tc01_g000760	8.59e-35	C:nucleus	.	Tc00_g078450	7.3e-127	C:integral component of membrane	.	Tc02_g023400	0	P:cellular protein modification process; F:kinase activity	.	Tc01_g037150	0	F:oxidoreductase activity	.
Tc01_g000770	0	P:carbohydrate metabolic process; P:catabolic process; P:cell wall organization or biogenesis; F:hydrolase activity, acting on glycosyl bonds	.	Tc00_g078840	2.4e-144	P:phosphorylation; F:kinase activity	.	Tc02_g023630	0	C:cellular_component	.	Tc01_g037190	0	P:cellular protein modification process; F:kinase activity; C:plasma membrane	.
Tc01_g001110	2.75e-166	F:ion binding; C:cellular_component	.	Tc00_g078890	0	F:zinc ion binding	.	Tc02_g023650	0	F:oxidoreductase activity; F:ion binding; C:extracellular region; C:plastid; C:thylakoid	.	Tc01_g037320	0	P:Cell division; C:microtubule organizing center; P:cytoskeleton organization; P:cellular protein modification process; C:nuclear chromosome; P:chromosome segregation; C:protein complex; F:kinase activity; P:Cell cycle	.
Tc01_g001360	0	P:small molecule metabolic process; C:endosome; F:lyase activity; C:Golgi apparatus; P:biosynthetic process; C:plastid	.	Tc00_g079470	1.66e-110	P:biological_process; C:cellular_component	.	Tc02_g023850	0	P:small molecule metabolic process; P:carbohydrate metabolic process; F:transferase activity, transferring glycosyl groups; C:cytoplasm; F:ion binding; P:biosynthetic process; P:Response to stress	.	Tc01_g037350	0	C:apoplast; P:metabolic process; C:integral component of membrane; C:plant-type cell wall; C:anchored component of plasma membrane; F:gamma-glutamyltransferase activity	.
Tc01_g001490	0	P:small molecule metabolic process; P:carbohydrate metabolic process; F:ion binding; P:cellular protein modification process; F:hydrolase activity, acting on glycosyl bonds	.	Tc00_g079710	0	P:lignin catabolic process; F:copper ion binding; C:apoplast; P:oxidation-reduction process; F:hydroquinone:oxygen oxidoreductase activity	.	Tc02_g023950	0	P:carbohydrate metabolic process; F:lyase activity; P:cell wall organization or biogenesis; C:extracellular region; F:hydrolase activity, acting on glycosyl bonds	.	Tc01_g037440	4.5e-115	F:ion binding	.
Tc01_g001520	1.74e-98	F:molecular_function	.	Tc00_g079800	0	P:small molecule metabolic process; C:mitochondrion; P:cofactor metabolic process; P:lipid metabolic process; P:biosynthetic process; F:transferase activity, transferring alkyl or aryl (other than methyl) groups	.	Tc02_g024060	0	F:RNA binding	.	Tc01_g037530	0	F:DNA binding	.
Tc01_g001560	0	C:integral component of membrane	.	Tc00_g080530	5.6e-158	C:integral component of membrane; P:phosphorylation; F:kinase activity	.	Tc02_g024180	0	C:integral component of membrane; C:Golgi apparatus; P:cell wall organization or biogenesis; F:O-acetyltransferase activity	.	Tc01_g037650	0	F:molecular_function	.
Tc01_g001580	0	C:cellular_component	.	Tc00_g081010	8.3e-35	P:nucleic acid metabolic process; F:organic cyclic compound binding; F:heterocyclic compound binding	.	Tc02_g024330	0	P:transmembrane transport; C:plasma membrane	.	Tc01_g037840	0	P:embryo development; F:transferase activity, transferring acyl groups; C:mitochondrion; P:tRNA metabolic process; C:protein complex; F:peptidase activity; P:reproduction	.
Tc01_g001590	0	C:integral component of membrane	.	Tc00_g081380	0	C:nucleus; C:cytoplasm; P:signal transduction; F:ion binding; P:cellular protein modification process; F:kinase activity; C:plasma membrane	.	Tc02_g024480	0	C:cytoplasm; P:chromosome organization; P:chromosome segregation; P:Cell cycle; P:reproduction	.	Tc01_g038020	0	C:endoplasmic reticulum; P:protein folding; C:plasma membrane; P:Response to stress	.
Tc01_g001620	0	C:nucleus; C:cytoplasm	.	Tc00_g081640	0	C:integral component of membrane; P:protein glycosylation; F:galactosyltransferase activity; C:Golgi apparatus	.	Tc02_g024860	0	F:oxidoreductase activity; F:ion binding	.	Tc01_g038090	0	P:Cell division; C:cytoplasm; P:chromosome segregation; F:cytoskeletal protein binding	.
Tc01_g001830	0	F:molecular_function	.	Tc00_g081891	0	F:nucleic acid binding; P:RNA phosphodiester bond hydrolysis, endonucleolytic; F:RNA-DNA hybrid ribonuclease activity; F:RNA-directed DNA polymerase activity; P:RNA-dependent DNA biosynthetic process	.	Tc02_g025040	0	F:phosphatase activity; F:ion binding; P:cellular protein modification process	.	Tc01_g038490	2.23e-174	C:nucleus; F:DNA binding; P:anatomical structure development; P:Cell cycle; P:reproduction	.
Tc01_g001920	0	F:ion binding	.	Tc00_g082340	0	P:clathrin coat assembly; F:clathrin binding; C:clathrin-coated vesicle; F:1-phosphatidylinositol binding	.	Tc02_g025760	5.32e-114	F:ion binding; P:photosynthesis; C:protein complex; C:thylakoid	.	Tc01_g038640	1e-127	C:nucleus; F:DNA binding; F:transcription factor activity, sequence-specific DNA binding; P:transcription, DNA-templated; P:regulation of transcription, DNA-templated	.
Tc01_g001930	0	F:lyase activity; P:cellular nitrogen compound metabolic process	.	Tc00_g082490	1.91e-68	C:cellular_component	.	Tc02_g025990	0	C:plastid	.	Tc01_g038940	0	C:cellular_component	.
Tc01_g001970	1.14e-93	P:small molecule metabolic process; C:nucleus; F:DNA binding; P:carbohydrate metabolic process; P:protein targeting; P:catabolic process; C:chromosome; C:protein complex	.	Tc00_g082770	3.73e-160	C:cellular_component	.	Tc02_g026390	1.1e-151	C:nuclear envelope; P:mitotic spindle assembly checkpoint; F:DNA binding; C:cytoplasm; C:kinetochore microtubule; C:chromocenter; C:kinetochore	.	Tc01_g038980	7.9e-49	C:cellular_component	.
Tc01_g002110	0	P:pectin catabolic process; C:cell wall; F:aspartyl esterase activity; F:lyase activity; P:cell wall modification; F:pectinesterase activity	.	Tc00_g082900	0	C:nucleus; F:DNA binding; F:nucleic acid binding transcription factor activity; P:cellular nitrogen compound metabolic process; P:biosynthetic process	.	Tc02_g026770	0	P:cellular protein modification process; C:cellular_component; F:kinase activity	.	Tc01_g039060	2.84e-174	F:phosphatase activity; C:cellular_component	.
Tc01_g002450	0	C:cytosol; F:molecular_function	.	Tc00_g082971	0	F:ion binding	.	Tc02_g026960	1.4e-106	C:cytoplasm; P:homeostatic process; F:ion binding; P:transport	.	Tc01_g039350	4.46e-76	C:plasma membrane; F:molecular_function	.
Tc01_g002460	0	F:phosphoprotein phosphatase activity; P:protein dephosphorylation; F:ADP binding; P:defense response	.	Tc00_g083320	0	F:nucleic acid binding; C:membrane	.	Tc02_g028020	0	C:cellular_component	.	Tc01_g039930	5.15e-143	F:peptidase activity; C:cellular_component	.
Tc01_g002610	0	P:transport; C:intracellular; F:molecular_function	.	Tc00_g083950	0	P:carbohydrate metabolic process; C:cellular_component; F:hydrolase activity, acting on glycosyl bonds	.	Tc02_g028070	0	P:carbohydrate metabolic process; C:plasma membrane; F:hydrolase activity, acting on glycosyl bonds	.	Tc01_g040290	0	C:cellular_component	.
Tc01_g002620	0	C:cell; P:homeostatic process; F:phosphatase activity; P:cellular protein modification process; P:Response to stress	.	Tc00_g084610	0	P:carbohydrate metabolic process; F:transferase activity, transferring glycosyl groups; P:biosynthetic process	.	Tc02_g028310	0	P:cellulose catabolic process; F:cellulase activity	.	Tc01_g040410	0	P:lipid metabolic process; F:methyltransferase activity; P:biosynthetic process; C:cellular_component	.
Tc01_g002900	0	C:cellular_component	.	Tc00_g084630	0	F:lyase activity; P:cellular nitrogen compound metabolic process	.	Tc02_g028340	1.04e-136	F:enzyme regulator activity	.	Tc01_g040420	0	P:lipid metabolic process; F:methyltransferase activity; P:biosynthetic process; C:cellular_component	.
Tc01_g003120	0	P:DNA metabolic process; P:Response to stress; F:hydrolase activity, acting on glycosyl bonds	.	Tc00_g084690	0	P:RNA phosphodiester bond hydrolysis, endonucleolytic; F:nucleic acid binding; F:RNA-DNA hybrid ribonuclease activity	.	Tc02_g028370	2.84e-45	C:nucleus; F:DNA binding; P:chromosome organization; P:protein complex assembly; C:chromosome; C:protein complex; P:cellular nitrogen compound metabolic process; P:biosynthetic process	.	Tc01_g040430	0	F:nucleotidyltransferase activity; C:cell wall; P:cellular nitrogen compound metabolic process; P:biosynthetic process; C:plasma membrane	.
Tc01_g003190	5.84e-60	P:response to oxidative stress; C:nucleus; C:mitochondrion; F:molecular_function	.	Tc00_g084700	1.42e-115	P:RNA phosphodiester bond hydrolysis, endonucleolytic; F:nucleic acid binding; F:RNA-DNA hybrid ribonuclease activity	.	Tc02_g028440	0	C:nucleus; C:plastid	.	Tc01_g040460	1.27e-89	C:cellular_component	.
Tc01_g003270	0	F:phosphatase activity; P:transport; C:intracellular	.	Tc00_g085590	0	F:molecular_function	.	Tc02_g028970	0	F:molecular_function	.	Tc01_g040540	0	F:RNA binding; C:plastid; P:translation	.
Tc01_g003370	0	P:signal transduction; P:cellular protein modification process; P:anatomical structure development; F:kinase activity; C:intracellular; C:plasma membrane	.	Tc00_g086010	1.4e-10	F:metal ion binding	.	Tc02_g029320	0	F:oxidoreductase activity; P:cellular protein modification process; C:cellular_component; F:kinase activity	.	Tc01_g040720	0	F:transferase activity	.
Tc01_g003380	0	F:transferase activity, transferring acyl groups; P:catabolic process; C:protein complex; C:intracellular	.	Tc00_g086270	0	C:cellular_component	.	Tc02_g029590	0	P:Cell division; P:cytoskeleton organization; F:cytoskeletal protein binding; P:Cell cycle	.	Tc01_g040770	2.13e-113	F:ion binding; P:photosynthesis; C:protein complex; C:thylakoid	.
Tc01_g003460	0	F:transmembrane transporter activity; C:plasma membrane	.	Tc00_g087330	0	F:molecular_function; P:Response to stress	.	Tc02_g029810	0	P:embryo development; P:homeostatic process; P:cellular protein modification process; F:phosphatase activity; C:endoplasmic reticulum; F:signal transducer activity; P:transport; F:kinase activity; P:Response to stress; F:enzyme binding	.	Tc01_g040890	0	F:2-alkenal reductase [NAD(P)] activity; C:integral component of membrane; P:oxidation-reduction process; P:phosphorylation; F:kinase activity	.
Tc01_g003550	0	F:molecular_function	.	Tc00_g087351	0	F:ion binding	.	Tc02_g030130	1.4e-172	P:dephosphorylation; F:acid phosphatase activity	.	Tc01_g040910	1.33e-150	F:RNA binding; P:tRNA metabolic process; F:methyltransferase activity	.
Tc01_g003730	0	F:transferase activity, transferring glycosyl groups; P:cell morphogenesis; C:cell wall; P:cellular protein modification process; C:endoplasmic reticulum; C:Golgi apparatus; P:cell wall organization or biogenesis; P:biosynthetic process; C:nucleolus; C:vacuole; P:growth	.	Tc00_g087360	2.3e-128	C:cellular_component	.	Tc02_g030240	0	F:oxidoreductase activity; P:cellular protein modification process; C:cellular_component; F:kinase activity	.	Tc01_g041000	0	P:anatomical structure development; C:nuclear chromosome; C:nucleolus	.
Tc01_g003770	0	C:cellular_component	.	Tc00_g087950	0	F:nucleotide binding; P:organophosphate metabolic process; F:RNA binding; F:metal ion binding; P:carbohydrate derivative metabolic process; P:phosphate-containing compound metabolic process	.	Tc02_g030250	0	F:nucleic acid binding; C:nucleus; F:zinc ion binding; P:replication fork protection; P:cellular response to DNA damage stimulus; P:Cell cycle	.	Tc02_g000060	0	C:nucleus; F:DNA binding; F:ATP binding; P:DNA replication initiation; F:DNA helicase activity; P:DNA duplex unwinding; C:MCM complex	.
Tc01_g003800	1.21e-153	F:ion binding; C:cellular_component	.	Tc00_g088460	0	C:cellular_component; F:molecular_function	.	Tc02_g030350	0	P:secondary metabolic process; F:oxidoreductase activity; P:cell morphogenesis; P:lipid metabolic process; P:cell wall organization or biogenesis; P:biosynthetic process; C:vacuole; C:plasma membrane; P:growth	.	Tc02_g000080	1.59e-132	P:generation of precursor metabolites and energy; P:protein complex assembly; P:photosynthesis; C:plastid; P:Response to stress; C:thylakoid	.
Tc01_g003810	0	P:carbohydrate metabolic process; F:transferase activity, transferring glycosyl groups; C:Golgi apparatus; P:biosynthetic process	.	Tc00_g088580	0	F:nucleic acid binding; P:RNA phosphodiester bond hydrolysis, endonucleolytic; F:RNA-DNA hybrid ribonuclease activity	.	Tc02_g030360	1.05e-148	F:ligase activity	.	Tc02_g000330	0	P:biological_process; F:transferase activity, transferring glycosyl groups	.
Tc01_g003830	2.05e-100	F:oxidoreductase activity; F:ion binding	.	Tc00_g088690	1.1e-166	F:aspartic-type endopeptidase activity; P:proteolysis	.	Tc02_g030550	8.35e-166	P:signal transduction; C:intracellular; F:molecular_function	.	Tc02_g000370	0	F:transmembrane transporter activity; F:oxidoreductase activity; C:cellular_component	.
Tc01_g003840	0	P:cellular protein modification process; F:kinase activity; F:signal transducer activity; C:plasma membrane; P:Response to stress; P:immune system process	.	Tc00_g088810	0	P:small molecule metabolic process; C:mitochondrion; P:cofactor metabolic process; P:lipid metabolic process; P:biosynthetic process; F:transferase activity, transferring alkyl or aryl (other than methyl) groups	.	Tc02_g031060	0	P:protein folding; C:plastid; F:molecular_function	.	Tc02_g000450	2.34e-92	P:catabolic process; F:ion binding; P:cellular protein modification process; C:cellular_component	.
Tc01_g003980	9.47e-87	C:plasma membrane	.	Tc00_g089220	4.72e-92	P:vesicle-mediated transport; C:cellular_component	.	Tc02_g031080	8.1e-142	F:transcription factor activity, sequence-specific DNA binding; P:regulation of transcription, DNA-templated; F:sequence-specific DNA binding	.	Tc02_g000750	6e-86	F:oxidoreductase activity	.
Tc01_g004050	0	F:oxidoreductase activity; P:cellular protein modification process; C:cellular_component; F:kinase activity	.	Tc00_g089240	2.84e-103	P:vesicle-mediated transport; C:cellular_component	.	Tc02_g031510	0	F:oxidoreductase activity; F:ion binding; C:cellular_component	.	Tc02_g000960	1.06e-69	P:photosynthesis; C:protein complex; C:plastid; F:molecular_function; C:thylakoid	.
Tc01_g004090	0	C:cellular_component	.	Tc00_g089300	0	P:biological_process; C:cellular_component; F:molecular_function	.	Tc02_g031720	0	C:nucleus; F:DNA binding	.	Tc02_g001110	0	C:cellular_component	.
Tc01_g004310	7.96e-69	F:nuclease activity	.	Tc00_g089930	2.5e-129	C:nucleus; F:DNA binding; F:transcription factor activity, sequence-specific DNA binding; P:transcription, DNA-templated; P:regulation of transcription, DNA-templated	.	Tc02_g031760	0	P:carbohydrate metabolic process; F:transferase activity, transferring glycosyl groups; C:cytosol; C:Golgi apparatus; P:biosynthetic process; P:cellular nitrogen compound metabolic process; F:isomerase activity	.	Tc02_g001340	0	F:FMN binding; F:NADPH dehydrogenase activity; P:oxidation-reduction process; C:intracellular	.
Tc01_g004320	0	F:hydrolase activity	.	Tc00_g090080	1.89e-32	F:ATPase activity; F:transmembrane transporter activity; C:plasma membrane	.	Tc02_g032050	0	F:kinase activity	.	Tc02_g001530	0	F:oxidoreductase activity; C:plastid; F:isomerase activity	.
Tc01_g004350	0	F:molecular_function	.	Tc00_g090130	0	F:ATPase activity; F:transmembrane transporter activity; C:plasma membrane	.	Tc02_g032170	1.33e-95	C:cellular_component	.	Tc02_g001610	5.04e-99	C:cellular_component	.
Tc01_g004440	0	F:oxidoreductase activity, oxidizing metal ions; C:plasmodesma; F:copper ion binding; C:integral component of membrane; P:oxidation-reduction process; C:plant-type cell wall	.	Tc00_g090170	2.4e-18	F:nucleic acid binding; F:ATP binding; P:DNA integration; F:protein kinase activity; F:ADP binding; P:protein phosphorylation; P:defense response; F:hydrolase activity	.	Tc02_g032180	0	C:protein complex; P:transport; C:plastid; F:molecular_function; C:thylakoid	.	Tc02_g001640	0	P:cellular protein modification process; C:cellular_component; F:kinase activity	.
Tc01_g004460	3.7e-124	C:endoplasmic reticulum membrane; C:integral component of membrane	.	Tc00_g090200	0	F:ethanolamine kinase activity; P:phosphorylation	.	Tc02_g032360	0	P:carbohydrate metabolic process; F:transferase activity, transferring glycosyl groups; P:generation of precursor metabolites and energy; C:cytoplasm; P:catabolic process; F:ion binding	.	Tc02_g001710	0	C:nucleus; F:methyltransferase activity	.
Tc01_g004470	0	C:endoplasmic reticulum	.	Tc00_g090810	0	F:phosphatase activity; P:cellular protein modification process	.	Tc02_g032470	9.71e-162	P:biological_process; F:transferase activity, transferring glycosyl groups	.	Tc02_g001980	0	C:nucleus; F:DNA binding; P:cellular nitrogen compound metabolic process; P:biosynthetic process	.
Tc01_g004530	9.3e-176	F:DNA binding	.	Tc00_g090850	0	F:molecular_function	.	Tc02_g032480	2.26e-136	P:biological_process; F:transferase activity, transferring glycosyl groups	.	Tc02_g002090	0	F:oxidoreductase activity; P:lipid metabolic process; F:ion binding; F:lyase activity	.
Tc01_g004580	0	P:cellular protein modification process; F:kinase activity; C:plasma membrane	.	Tc00_g090950	0	F:ubiquitin-protein transferase activity; C:Cul3-RING ubiquitin ligase complex; P:protein ubiquitination	.	Tc02_g032490	0	P:biological_process; F:transferase activity, transferring glycosyl groups	.	Tc02_g002190	0	P:biological_process; F:transferase activity, transferring glycosyl groups	.
Tc01_g004660	0	C:nucleus; C:cytoplasm; P:signal transduction; F:ion binding; P:cellular protein modification process; F:kinase activity; C:plasma membrane	.	Tc00_g091980	0	F:inositol oxygenase activity; C:cytoplasm; F:iron ion binding; P:inositol catabolic process; P:oxidation-reduction process	.	Tc02_g032760	3.5e-111	C:cellular_component	.	Tc02_g002200	0	P:small molecule metabolic process; F:transferase activity, transferring glycosyl groups; P:biosynthetic process; C:organelle; C:intracellular	.
Tc01_g004740	1.45e-35	F:molecular_function	.	Tc00_g092010	0	F:DNA binding	.	Tc02_g033080	2.24e-125	F:ligase activity	.	Tc02_g002540	1.39e-116	F:oxidoreductase activity; C:cellular_component	.
Tc01_g004840	0	C:cellular_component	.	Tc00_g092380	3.07e-125	P:signal transduction; C:intracellular; C:plasma membrane; F:molecular_function	.	Tc02_g033170	0	F:DNA binding; P:cellular nitrogen compound metabolic process; P:biosynthetic process	.	Tc02_g002550	0	F:translation initiation factor activity; P:translational initiation	.
Tc01_g004930	8.2e-108	C:nucleus; F:DNA binding; F:transcription factor activity, sequence-specific DNA binding; P:transcription, DNA-templated; P:regulation of transcription, DNA-templated	.	Tc00_g092430	3.3e-102	F:2-alkenal reductase [NAD(P)] activity; F:calcium ion binding; P:oxidation-reduction process	.	Tc02_g033190	0	C:nucleus; F:DNA binding; P:cellular nitrogen compound metabolic process; P:biosynthetic process	.	Tc02_g002590	0	P:small molecule metabolic process; P:carbohydrate metabolic process; P:generation of precursor metabolites and energy; F:oxidoreductase activity	.
Tc01_g005130	0	F:nucleotidyltransferase activity; F:nuclease activity; P:biosynthetic process; P:DNA metabolic process	.	Tc00_g092450	0	F:ATPase activity; F:transmembrane transporter activity; F:ion binding; C:organelle; C:plasma membrane; C:intracellular	.	Tc02_g033660	7e-125	C:plasmodesma; F:oxidoreductase activity; C:integral component of membrane; P:oxidation-reduction process	.	Tc02_g002610	0	F:DNA binding	.
Tc01_g005160	0	P:lipid metabolic process; F:hydrolase activity	.	Tc00_g092460	0	C:integral component of plasma membrane; F:ATP binding; F:metal ion binding; C:intracellular membrane-bounded organelle; P:metabolic process; P:calcium ion transmembrane transport; F:calcium-transporting ATPase activity	.	Tc02_g033830	0	F:DNA binding; F:nucleic acid binding transcription factor activity; P:cellular nitrogen compound metabolic process; P:biosynthetic process; P:Cell cycle	.	Tc02_g002620	0	F:oxidoreductase activity; C:cytosol; P:cellular amino acid metabolic process; P:biosynthetic process	.
Tc01_g005190	0	P:cellular protein modification process; F:kinase activity	.	Tc00_g094220	0	F:ion binding; F:peptidase activity; P:DNA metabolic process	.	Tc02_g033910	0	P:cellular protein modification process; C:cellular_component; F:kinase activity	.	Tc02_g002950	0	C:cellular_component	.
Tc01_g005230	0	P:lipid metabolic process; C:integral component of membrane; F:phosphoric diester hydrolase activity	.	Tc00_g095460	3.76e-159	F:molecular_function	.	Tc02_g034150	0	P:carbohydrate metabolic process; F:hydrolase activity, acting on glycosyl bonds	.	Tc02_g002980	0	F:ion binding; P:protein maturation; F:peptidase activity; C:plastid	.
Tc01_g005290	1.53e-179	P:secondary metabolic process; F:ion binding; F:methyltransferase activity; P:biosynthetic process	.	Tc00_g095810	4.8e-143	F:nucleic acid binding; F:zinc ion binding; F:ubiquitin-protein transferase activator activity; P:DNA integration; F:anaphase-promoting complex binding; F:hydrolase activity	.	Tc02_g034470	0	F:transmembrane transporter activity; C:plasma membrane	.	Tc02_g003230	0	P:cytoskeleton organization; P:chromosome organization; F:structural molecule activity; C:nuclear chromosome; P:chromosome segregation; P:mitotic nuclear division; C:protein complex	.
Tc01_g005300	1.6e-152	P:metabolic process; F:ligase activity	.	Tc00_g096780	0	F:nucleic acid binding; P:RNA phosphodiester bond hydrolysis, endonucleolytic; F:RNA-DNA hybrid ribonuclease activity; F:RNA-directed DNA polymerase activity; P:DNA integration; P:RNA-dependent DNA biosynthetic process	.	Tc02_g034580	0	P:generation of precursor metabolites and energy; P:cellular protein modification process; P:photosynthesis; F:kinase activity; C:plastid	.	Tc02_g003290	3.03e-134	C:plasma membrane	.
Tc01_g005320	0	C:nucleus; F:RNA binding; P:anatomical structure development; P:cellular protein modification process; F:methyltransferase activity; C:protein complex; P:cellular nitrogen compound metabolic process; P:reproduction	.	Tc01_g000310	0	P:transmembrane transport; C:cellular_component	.	Tc02_g034980	0	F:peptidase activity; C:cellular_component	.	Tc02_g003550	0	C:nucleus	.
Tc01_g005540	0	F:oxidoreductase activity; F:ion binding; P:biosynthetic process	.	Tc01_g000540	0	P:cellular protein modification process; F:kinase activity; F:transferase activity, transferring alkyl or aryl (other than methyl) groups	.	Tc02_g034990	0	F:lyase activity; F:ion binding; P:cellular amino acid metabolic process; P:biosynthetic process; C:plastid; F:isomerase activity	.	Tc02_g003860	5.35e-62	F:translation factor activity, RNA binding	.
Tc01_g005550	0	F:oxidoreductase activity; F:ion binding; P:Response to stress	.	Tc01_g000710	3e-149	F:translation initiation factor activity; C:cytoplasm; P:translational initiation; C:eukaryotic translation initiation factor 3 complex	.	Tc03_g000390	0	C:nucleus; C:transcription factor complex; F:DNA binding; F:transcription factor activity, sequence-specific DNA binding; P:transcription, DNA-templated; P:regulation of transcription, DNA-templated	.	Tc02_g004380	0	P:biological_process; F:transferase activity, transferring glycosyl groups	.
Tc01_g005640	0	F:nuclease activity	.	Tc01_g000720	0	F:catalytic activity; C:membrane; P:metabolic process	.	Tc03_g000470	0	P:cellular protein modification process; F:kinase activity	.	Tc02_g004390	0	P:transmembrane transport; C:cellular_component; F:molecular_function	.
Tc01_g005730	0	F:zinc ion binding; F:cinnamyl-alcohol dehydrogenase activity; C:integral component of membrane; P:oxidation-reduction process; F:sinapyl alcohol dehydrogenase activity	.	Tc01_g000760	7.3e-35	C:nucleus	.	Tc03_g000530	0	F:oxidoreductase activity; P:catabolic process; F:ion binding; C:extracellular region; P:Response to stress	.	Tc02_g004530	0	F:transmembrane transporter activity; C:plasma membrane	.
Tc01_g005740	3.2e-159	F:zinc ion binding; F:oxidoreductase activity, acting on the CH-OH group of donors, NAD or NADP as acceptor; P:oxidation-reduction process	.	Tc01_g000770	0	P:carbohydrate metabolic process; P:catabolic process; P:cell wall organization or biogenesis; F:hydrolase activity, acting on glycosyl bonds	.	Tc03_g000610	4.77e-132	C:cellular_component	.	Tc02_g004620	0	C:cellular_component	.
Tc01_g005760	3.73e-163	C:cellular_component	.	Tc01_g000800	0	P:carbohydrate metabolic process; P:catabolic process; P:cell wall organization or biogenesis; F:hydrolase activity, acting on glycosyl bonds	.	Tc03_g000620	0	P:transmembrane transport; C:cellular_component; F:molecular_function	.	Tc02_g004830	0	C:integral component of plasma membrane; P:water transport; C:plasmodesma; F:glycerol channel activity; P:cellular water homeostasis; P:glycerol transport; P:ion transmembrane transport; F:water channel activity; C:vacuole	.
Tc01_g006040	0	C:nucleus; C:cytoplasm; P:cellular protein modification process; F:molecular_function	.	Tc01_g000880	5.3e-170	C:membrane	.	Tc03_g001110	0	P:biological_process; F:lyase activity; F:ion binding	.	Tc02_g005140	2.64e-102	C:cytoskeleton; P:cytoskeleton organization; F:cytoskeletal protein binding	.
Tc01_g006190	0	F:oxidoreductase activity; F:ion binding; P:cellular protein modification process; C:cellular_component	.	Tc01_g000970	1.92e-130	F:molecular_function	.	Tc03_g001280	0	P:embryo development; C:nucleus; F:DNA binding; P:cellular nitrogen compound metabolic process; P:biosynthetic process; P:reproduction	.	Tc02_g005190	0	C:cellular_component	.
Tc01_g006200	0	F:L-ascorbic acid binding; F:iron ion binding; F:oxidoreductase activity, acting on paired donors, with incorporation or reduction of molecular oxygen; C:integral component of membrane; P:oxidation-reduction process	.	Tc01_g001070	1.14e-89	F:oxidoreductase activity; C:plasma membrane	.	Tc03_g001850	0	F:DNA binding	.	Tc02_g005270	0	P:lipid metabolic process; F:molecular_function	.
Tc01_g006340	0	C:cellular_component	.	Tc01_g001110	2.75e-166	F:ion binding; C:cellular_component	.	Tc03_g003290	0	C:cellular_component	.	Tc02_g005380	6.47e-137	P:secondary metabolic process; P:biosynthetic process; F:enzyme regulator activity	.
Tc01_g006460	0	C:nucleus; C:mitochondrion	.	Tc01_g001360	0	P:small molecule metabolic process; C:endosome; F:lyase activity; C:Golgi apparatus; P:biosynthetic process; C:plastid	.	Tc03_g003320	0	C:nucleus; F:DNA binding; F:nucleic acid binding transcription factor activity; P:cellular nitrogen compound metabolic process; P:biosynthetic process	.	Tc02_g005420	0	P:metabolic process; C:integral component of membrane; F:carbon-nitrogen ligase activity, with glutamine as amido-N-donor	.
Tc01_g006470	0	F:ATPase activity; F:transmembrane transporter activity; F:ion binding; C:organelle; C:plasma membrane; C:intracellular	.	Tc01_g001490	0	P:protein deglycosylation; F:alpha-mannosidase activity; F:zinc ion binding; P:mannose metabolic process; F:carbohydrate binding	.	Tc03_g003350	1.69e-130	C:plastid; C:thylakoid	.	Tc02_g005570	3.21e-39	C:membrane; C:integral component of membrane	.
Tc01_g006790	0	F:nucleotidyltransferase activity; P:metabolic process; F:amino acid binding	.	Tc01_g001510	0	P:response to biotic stimulus; F:calmodulin binding; C:integral component of membrane; P:defense response; C:plasma membrane	.	Tc03_g004260	0	F:ATPase activity; F:ATP binding; F:microtubule motor activity; P:metabolic process; P:cytokinesis by cell plate formation; P:pollen development; C:kinesin complex; P:microtubule-based movement; P:embryo sac cellularization; C:microtubule; F:microtubule binding	.	Tc02_g005580	8.8e-84	C:cellular_component	.
Tc01_g006800	0	C:cellular_component	.	Tc01_g001520	1.74e-98	F:molecular_function	.	Tc03_g006430	0	P:RNA phosphodiester bond hydrolysis, endonucleolytic; F:nucleic acid binding; F:RNA-DNA hybrid ribonuclease activity; P:DNA integration	.	Tc02_g006130	5e-64	P:biological_process	.
Tc01_g007030	0	F:ion binding; P:biosynthetic process	.	Tc01_g001560	0	C:integral component of membrane	.	Tc03_g006900	0	P:cellular protein modification process; C:cellular_component; F:kinase activity	.	Tc02_g006210	4.82e-115	P:biological_process; C:cellular_component	.
Tc01_g007240	0	F:DNA binding	.	Tc01_g001580	0	C:integral component of membrane	.	Tc03_g007010	0	P:Cell division	.	Tc02_g006310	0	F:oxidoreductase activity	.
Tc01_g007340	0	F:phosphoenolpyruvate carboxykinase (ATP) activity; F:ATP binding; P:gluconeogenesis; P:phosphorylation; F:kinase activity	.	Tc01_g001590	0	C:integral component of membrane	.	Tc03_g008290	0	P:generation of precursor metabolites and energy; F:ion binding; P:cellular protein modification process; P:photosynthesis; C:protein complex; C:plastid; C:thylakoid	.	Tc02_g006350	0	P:biological_process; C:plastid; F:molecular_function	.
Tc01_g007460	0	F:oxidoreductase activity; C:cell wall; C:mitochondrion; F:ion binding; F:unfolded protein binding; P:protein folding; C:vacuole	.	Tc01_g001620	0	C:nucleus; C:cytoplasm	.	Tc03_g009100	0	C:cellular_component; F:molecular_function	.	Tc02_g006400	0	P:small molecule metabolic process; P:carbohydrate metabolic process; P:generation of precursor metabolites and energy; P:catabolic process; P:cofactor metabolic process; F:lyase activity; P:cellular nitrogen compound metabolic process	.
Tc01_g007590	0	P:cellular protein modification process; C:cellular_component; F:kinase activity	.	Tc01_g001830	0	F:molecular_function	.	Tc03_g009500	0	P:cellular protein modification process; C:cellular_component; F:kinase activity	.	Tc02_g006620	3.11e-170	C:cellular_component	.
Tc01_g007600	0	F:nuclease activity	.	Tc01_g001920	0	F:ion binding	.	Tc03_g009540	0	C:nucleus; F:DNA binding; F:nucleic acid binding transcription factor activity; P:cellular nitrogen compound metabolic process; P:biosynthetic process	.	Tc02_g007060	0	P:cellular protein modification process; C:cellular_component; F:kinase activity	.
Tc01_g007621	0	F:nucleic acid binding; F:zinc ion binding; P:DNA integration	.	Tc01_g001930	0	F:lyase activity; P:cellular nitrogen compound metabolic process	.	Tc03_g009560	7.48e-87	C:plastid; C:thylakoid	.	Tc02_g007520	0	C:nucleus; F:DNA binding; P:chromosome organization; C:cytosol; F:helicase activity; C:protein complex; P:biosynthetic process; P:DNA metabolic process	.
Tc01_g007680	0	P:cellular protein modification process; C:cellular_component; F:kinase activity	.	Tc01_g001970	1.14e-93	P:small molecule metabolic process; C:nucleus; F:DNA binding; P:carbohydrate metabolic process; P:protein targeting; P:catabolic process; C:chromosome; C:protein complex	.	Tc03_g009590	0	F:transferase activity, transferring glycosyl groups; C:cellular_component	.	Tc02_g007580	0	P:carbohydrate metabolic process; C:cell wall; C:vacuole; F:hydrolase activity, acting on glycosyl bonds	.
Tc01_g007730	0	F:oxidoreductase activity; F:ion binding	.	Tc01_g002110	0	P:pectin catabolic process; C:cell wall; F:aspartyl esterase activity; F:lyase activity; P:cell wall modification; F:pectinesterase activity	.	Tc03_g009850	0	F:kinase activity; C:plasma membrane	.	Tc02_g007930	5.46e-100	P:generation of precursor metabolites and energy; F:ion binding	.
Tc01_g007760	4.2e-82	F:DNA binding; F:zinc ion binding	.	Tc01_g002450	0	C:cytosol; F:molecular_function	.	Tc03_g011030	0	F:oxidoreductase activity; P:cofactor metabolic process; P:tRNA metabolic process; P:photosynthesis; P:biosynthetic process	.	Tc02_g008150	0	C:nucleus; F:DNA binding; P:cellular nitrogen compound metabolic process; P:biosynthetic process	.
Tc01_g007940	0	P:cellular protein modification process; F:kinase activity	.	Tc01_g002460	0	F:molecular_function; P:Response to stress	.	Tc03_g011930	0	F:oxidoreductase activity; F:ion binding; C:cellular_component	.	Tc02_g008360	0	C:nucleus; F:DNA binding; P:cellular nitrogen compound metabolic process; P:biosynthetic process	.
Tc01_g008010	0	F:DNA binding	.	Tc01_g002610	0	C:integral component of membrane; P:transport; C:intracellular; F:transporter activity	.	Tc03_g012200	0	C:nucleus; F:DNA binding; P:biosynthetic process; P:DNA metabolic process; P:Response to stress	.	Tc02_g008390	1.1e-67	F:organic cyclic compound binding; F:heterocyclic compound binding; F:oxidoreductase activity; C:integral component of membrane; P:response to stimulus	.
Tc01_g008150	0	C:mitochondrial membrane; P:transmembrane transport; F:structural constituent of ribosome; P:mitochondrial transport; C:integral component of membrane; P:translation	.	Tc01_g002620	0	C:cell; P:homeostatic process; F:phosphatase activity; P:cellular protein modification process; P:Response to stress	.	Tc03_g012650	3.27e-168	F:peptidase activity; P:Response to stress	.	Tc02_g008610	0	P:metabolic process; F:hydrolase activity	.
Tc01_g008240	2.8e-168	P:oxidation-reduction process; F:dihydrofolate reductase activity	.	Tc01_g002650	0	C:cellular_component; F:molecular_function	.	Tc03_g012770	0	F:kinase activity	.	Tc02_g008770	0	F:oxidoreductase activity; P:homeostatic process; P:lipid metabolic process; F:ion binding; P:anatomical structure development; P:biosynthetic process; C:cellular_component	.
Tc01_g008270	0	F:transmembrane transporter activity; C:cellular_component	.	Tc01_g002770	0	F:methyltransferase activity	.	Tc03_g012850	0	F:DNA binding; F:zinc ion binding	.	Tc02_g009060	0	C:plasma membrane	.
Tc01_g008560	0	F:ATPase activity; C:cellular_component	.	Tc01_g002900	0	C:cellular_component	.	Tc03_g013500	0	F:ATPase activity; P:biological_process; C:cytoskeleton; C:protein complex; F:cytoskeletal protein binding	.	Tc02_g009160	0	P:small molecule metabolic process; F:transferase activity, transferring glycosyl groups; P:biosynthetic process; C:organelle; C:intracellular	.
Tc01_g008610	3.2e-54	P:aromatic amino acid family biosynthetic process; F:3-deoxy-7-phosphoheptulonate synthase activity	.	Tc01_g003270	0	F:phosphatase activity; P:transport; C:intracellular	.	Tc03_g014610	0	P:cellular protein modification process; C:cellular_component; F:kinase activity	.	Tc02_g009300	0	C:nucleus; C:membrane; P:G1/S transition of mitotic Cell cycle; P:seed development; P:response to cytokinin	.
Tc01_g008840	0	F:ion binding	.	Tc01_g003460	0	C:integral component of plasma membrane; P:proton transport; F:2-alkenal reductase [NAD(P)] activity; F:sugar:proton symporter activity; P:glucose import; P:oxidation-reduction process; F:glucose transmembrane transporter activity; P:glucose transmembrane transport	.	Tc03_g014660	0	F:DNA binding; F:RNA binding; F:ion binding; C:plastid	.	Tc02_g009330	0	F:hydrolase activity, acting on carbon-nitrogen (but not peptide) bonds; P:small molecule metabolic process; P:catabolic process; C:endoplasmic reticulum; C:Golgi apparatus; P:cellular nitrogen compound metabolic process; C:plastid	.
Tc01_g008841	4.13e-154	P:RNA phosphodiester bond hydrolysis, endonucleolytic; F:nucleic acid binding; F:RNA-DNA hybrid ribonuclease activity; F:RNA-directed DNA polymerase activity; F:zinc ion binding; P:RNA-dependent DNA biosynthetic process	.	Tc01_g003550	0	F:molecular_function	.	Tc03_g014680	0	P:small molecule metabolic process; F:transferase activity, transferring glycosyl groups; C:cytosol; P:cellular nitrogen compound metabolic process; P:biosynthetic process; F:kinase activity; C:plastid	.	Tc02_g009350	2.84e-178	F:hydrolase activity, acting on carbon-nitrogen (but not peptide) bonds; P:small molecule metabolic process; P:catabolic process; C:endoplasmic reticulum; C:Golgi apparatus; P:cellular nitrogen compound metabolic process	.
Tc01_g008910	3.33e-174	C:cellular_component	.	Tc01_g003730	0	F:transferase activity, transferring glycosyl groups; P:cell morphogenesis; C:cell wall; P:cellular protein modification process; C:endoplasmic reticulum; C:Golgi apparatus; P:cell wall organization or biogenesis; P:biosynthetic process; C:nucleolus; C:vacuole; P:growth	.	Tc03_g014750	0	F:oxidoreductase activity; F:ion binding; C:cellular_component	.	Tc02_g009360	0	F:oxidoreductase activity; F:kinase activity	.
Tc01_g008920	3.8e-152	F:GTP binding; P:nucleocytoplasmic transport; P:retrograde vesicle-mediated transport, Golgi to ER; P:small GTPase mediated signal transduction; F:GTPase activity; C:membrane; P:metabolic process; C:cytosol; C:Golgi apparatus; P:intra-Golgi vesicle-mediated transport; P:intracellular protein transport; P:retrograde transport, endosome to Golgi	.	Tc01_g003770	0	C:integral component of membrane	.	Tc03_g015020	0	P:biological_process; F:molecular_function	.	Tc02_g009430	0	F:ATP binding; C:integral component of membrane; F:protein kinase activity; P:protein phosphorylation	.
Tc01_g008930	0	P:embryo development; P:reproduction	.	Tc01_g003790	0	P:small molecule metabolic process; F:transferase activity, transferring acyl groups; P:lipid metabolic process; P:biosynthetic process; C:cellular_component	.	Tc03_g015160	5.9e-91	P:cellular transition metal ion homeostasis; F:transition metal ion binding; C:cytoplasm; P:metal ion transport	.	Tc02_g009500	0	P:secondary metabolic process; F:oxidoreductase activity; F:ion binding; P:biosynthetic process	.
Tc01_g008960	0	F:transmembrane transporter activity; P:catabolic process; P:cellular component assembly; P:extracellular matrix organization; P:anatomical structure formation involved in morphogenesis; C:Golgi apparatus; C:endoplasmic reticulum; P:Response to stress	.	Tc01_g003800	1.21e-153	F:ion binding; C:cellular_component	.	Tc03_g015190	7.12e-72	C:cellular_component	.	Tc02_g009520	1.05e-13	C:cellular_component	.
Tc01_g008970	0	P:cellular amino acid metabolic process; P:biosynthetic process; F:ligase activity	.	Tc01_g003810	0	P:carbohydrate metabolic process; F:transferase activity, transferring glycosyl groups; C:Golgi apparatus; P:biosynthetic process	.	Tc03_g015680	0	P:secondary metabolic process; F:transferase activity, transferring acyl groups; P:catabolic process; F:peptidase activity	.	Tc02_g010260	6.77e-162	F:isomerase activity	.
Tc01_g009270	0	F:acyl-CoA dehydrogenase activity; C:peroxisome; F:acyl-CoA oxidase activity; P:fatty acid beta-oxidation; F:flavin adenine dinucleotide binding	.	Tc01_g003830	6.6e-85	F:oxidoreductase activity; F:calcium ion binding	.	Tc03_g016070	7.87e-121	C:cellular_component	.	Tc02_g010590	0	P:carbohydrate metabolic process; F:phosphatase activity	.
Tc01_g009410	0	F:nucleic acid binding	.	Tc01_g003840	0	F:ATP binding; P:peptidyl-tyrosine phosphorylation; F:chitin binding; F:transmembrane receptor protein tyrosine kinase activity; P:innate immune response; C:integral component of membrane; C:plasma membrane	.	Tc03_g016190	4.49e-137	P:cofactor metabolic process; F:lyase activity; P:cellular nitrogen compound metabolic process; P:biosynthetic process; C:plastid	.	Tc02_g010600	6.4e-180	P:biological_process; F:molecular_function	.
Tc01_g009420	0	F:ion binding; P:biosynthetic process	.	Tc01_g003980	9.47e-87	C:plasma membrane	.	Tc03_g016390	2.09e-140	P:cellular protein modification process; F:kinase activity; P:Cell cycle; F:enzyme binding	.	Tc02_g010860	0	P:cellular protein modification process	.
Tc01_g009470	0	F:oxidoreductase activity; F:ion binding; C:extracellular region	.	Tc01_g004090	0	C:cellular_component	.	Tc03_g016720	0	P:cellular protein modification process; C:cellular_component; F:kinase activity; F:signal transducer activity	.	Tc02_g010940	0	F:peptidase activity	.
Tc01_g009860	0	F:oxidoreductase activity; F:ion binding; C:cellular_component	.	Tc01_g004310	6.7e-69	F:nucleic acid binding; P:RNA phosphodiester bond hydrolysis, endonucleolytic; F:RNA-DNA hybrid ribonuclease activity	.	Tc03_g017040	0	P:embryo development; P:Cell division; P:cellular protein modification process; P:anatomical structure formation involved in morphogenesis; F:kinase activity; C:plasma membrane; P:reproduction	.	Tc02_g012040	2.47e-177	P:generation of precursor metabolites and energy; F:ion binding; P:cellular protein modification process; P:photosynthesis; C:protein complex; C:plastid; C:thylakoid	.
Tc01_g010070	0	F:kinase activity	.	Tc01_g004320	0	F:hydrolase activity	.	Tc03_g017130	0	F:oxidoreductase activity; P:cellular protein modification process; F:signal transducer activity; F:kinase activity; C:intracellular	.	Tc02_g012050	0	F:molecular_function	.
Tc01_g010140	1.29e-70	C:cellular_component	.	Tc01_g004340	3.3e-114	P:metabolic process; F:polyneuridine-aldehyde esterase activity; F:hydrolase activity	.	Tc03_g017160	0	C:nucleus; P:chromosome organization; P:chromosome segregation; P:mitotic nuclear division; C:chromosome; C:protein complex; F:molecular_function	.	Tc02_g012060	5.39e-65	F:lipid binding; P:transport; C:plasma membrane	.
Tc01_g010400	0	F:transmembrane transporter activity; C:cellular_component	.	Tc01_g004350	0	F:molecular_function	.	Tc03_g017170	0	F:molecular_function	.	Tc02_g012170	0	P:xylan catabolic process; F:xylan 1,4-beta-xylosidase activity; C:integral component of membrane; F:alpha-L-arabinofuranosidase activity; P:arabinan catabolic process; F:beta-glucosidase activity; C:plant-type cell wall	.
Tc01_g010660	6.82e-138	F:lyase activity	.	Tc01_g004410	2.1e-172	F:hydrolase activity	.	Tc03_g017400	0	F:phosphatase activity; F:ion binding; P:cellular protein modification process	.	Tc02_g012190	0	F:metal ion binding	.
Tc01_g010910	1.73e-147	F:ion binding; C:cellular_component	.	Tc01_g004440	0	F:oxidoreductase activity; F:ion binding; C:cellular_component	.	Tc03_g017740	0	C:nucleus; P:biosynthetic process; P:DNA metabolic process; P:Cell cycle	.	Tc02_g012210	0	C:peroxisome; P:biological_process; F:GTPase activity; C:plastid	.
Tc01_g010930	2.25e-156	F:ion binding; C:cellular_component	.	Tc01_g004460	2.52e-126	C:endoplasmic reticulum	.	Tc03_g018360	2.05e-164	F:DNA binding	.	Tc02_g012390	0	F:methyltransferase activity; C:cellular_component	.
Tc01_g011060	0	P:cellular protein modification process; F:kinase activity; C:plasma membrane; P:reproduction	.	Tc01_g004470	0	C:endoplasmic reticulum membrane; C:integral component of membrane	.	Tc03_g018540	0	P:cellular protein modification process; C:cellular_component; F:kinase activity	.	Tc02_g012820	0	F:transmembrane transporter activity; C:cellular_component	.
Tc01_g011070	0	P:cellular protein modification process; F:kinase activity; C:plasma membrane; P:reproduction	.	Tc01_g004530	9.3e-176	F:DNA binding	.	Tc03_g018710	5.57e-24	F:nucleic acid binding; C:nucleus	.	Tc02_g012830	0	F:transmembrane transporter activity; C:cytoplasm; C:organelle	.
Tc01_g011320	0	P:signal transduction; C:cellular_component	.	Tc01_g004540	0	C:nucleus; F:DNA binding; P:cellular nitrogen compound metabolic process; P:biosynthetic process	.	Tc03_g018800	0	F:phosphatase activity; P:cellular protein modification process; C:cellular_component; F:kinase activity	.	Tc02_g012850	0	C:plastid; F:molecular_function; C:thylakoid	.
Tc01_g011430	0	P:carbohydrate metabolic process; P:catabolic process; C:cell wall; P:cell wall organization or biogenesis; F:enzyme regulator activity	.	Tc01_g004580	0	P:cellular protein modification process; F:kinase activity; C:plasma membrane	.	Tc03_g019480	0	F:oxidoreductase activity; P:cellular protein modification process; P:anatomical structure development; F:phosphatase activity; F:signal transducer activity; F:kinase activity; C:intracellular; P:Cell cycle; P:reproduction	.	Tc02_g012960	0	P:carbohydrate metabolic process; C:cytoplasm; P:catabolic process; C:cell wall; P:lipid metabolic process; P:cell wall organization or biogenesis; P:cellular nitrogen compound metabolic process; C:extracellular region; F:hydrolase activity, acting on glycosyl bonds	.
Tc01_g011540	0	F:oxidoreductase activity; F:ion binding	.	Tc01_g004660	0	C:nucleus; C:cytoplasm; P:signal transduction; F:ion binding; P:cellular protein modification process; F:kinase activity; C:plasma membrane	.	Tc03_g019490	8e-115	P:flower development; P:vegetative to reproductive phase transition of meristem	.	Tc02_g013140	0	P:cytoskeleton-dependent intracellular transport; P:cell morphogenesis; C:cilium; C:protein complex; F:ligase activity	.
Tc01_g011560	0	F:structural constituent of ribosome; C:ribosome; P:translation	.	Tc01_g004740	1.45e-35	F:molecular_function	.	Tc03_g019930	0	P:small molecule metabolic process; F:oxidoreductase activity; P:lipid metabolic process; F:ion binding; P:biosynthetic process; C:cellular_component	.	Tc02_g013170	2.02e-62	C:nucleus; F:DNA binding; P:Cell differentiation; P:anatomical structure development	.
Tc01_g011570	0	C:nucleus; F:DNA binding; P:cellular nitrogen compound metabolic process; P:biosynthetic process	.	Tc01_g004760	2.27e-44	P:anatomical structure development	.	Tc03_g019990	0	P:cellular protein modification process; F:kinase activity; C:plasma membrane	.	Tc02_g013280	0	C:cytoplasm; P:cell wall organization or biogenesis; P:biosynthetic process; F:ligase activity	.
Tc01_g011600	0	F:molecular_function	.	Tc01_g004770	0	C:cellular_component; F:molecular_function	.	Tc03_g020080	0	F:transmembrane transporter activity; C:cellular_component	.	Tc02_g013860	0	P:catabolic process; F:peptidase activity	.
Tc01_g011640	0	F:oxidoreductase activity; P:lipid metabolic process; P:biosynthetic process; C:cellular_component; P:Response to stress	.	Tc01_g004930	8.2e-108	C:nucleus; F:DNA binding; F:transcription factor activity, sequence-specific DNA binding; P:transcription, DNA-templated; P:regulation of transcription, DNA-templated	.	Tc03_g020240	0	P:Cell division; F:ubiquitin-protein transferase activator activity; F:anaphase-promoting complex binding	.	Tc02_g013980	0	P:carbohydrate metabolic process; P:catabolic process; F:hydrolase activity, acting on glycosyl bonds	.
Tc01_g011780	0	C:cellular_component; F:molecular_function	.	Tc01_g005090	0	P:lipid metabolic process; C:integral component of membrane; F:hydrolase activity	.	Tc03_g020330	0	P:biological_process; C:cytoskeleton; F:cytoskeletal protein binding	.	Tc02_g014110	0	P:cellular protein modification process; C:cellular_component; F:kinase activity	.
Tc01_g011830	0	F:transmembrane transporter activity; C:Golgi apparatus	.	Tc01_g005130	0	F:nucleic acid binding; P:RNA phosphodiester bond hydrolysis, endonucleolytic; F:RNA-DNA hybrid ribonuclease activity; F:RNA-directed DNA polymerase activity; P:RNA-dependent DNA biosynthetic process	.	Tc03_g020510	0	P:biological_process; C:cytoskeleton; F:GTPase activity; F:structural molecule activity; C:Golgi apparatus	.	Tc02_g014310	8.44e-171	F:molecular_function	.
Tc01_g011850	0	C:cellular_component	.	Tc01_g005160	0	P:lipid metabolic process; F:hydrolase activity	.	Tc03_g020960	0	P:pectin catabolic process; P:negative regulation of catalytic activity; C:cell wall; F:aspartyl esterase activity; C:integral component of membrane; F:pectinesterase inhibitor activity; P:cell wall modification; F:pectinesterase activity	.	Tc02_g014350	0	C:nucleus; F:DNA binding; F:nucleic acid binding transcription factor activity; P:cellular nitrogen compound metabolic process; P:biosynthetic process	.
Tc01_g011960	0	F:molecular_function	.	Tc01_g005170	2.94e-166	F:DNA binding	.	Tc03_g021040	0	F:ligase activity	.	Tc02_g014400	0	P:carbohydrate metabolic process; F:transferase activity, transferring glycosyl groups; C:cell wall; P:cell wall organization or biogenesis; C:extracellular region; F:hydrolase activity, acting on glycosyl bonds	.
Tc01_g012000	0	P:cellular protein modification process; F:molecular_function	.	Tc01_g005190	0	P:cellular protein modification process; F:kinase activity	.	Tc03_g021520	5.72e-144	C:nucleus; F:DNA binding; F:oxidoreductase activity; F:nucleic acid binding transcription factor activity; P:cellular nitrogen compound metabolic process; P:biosynthetic process	.	Tc02_g014740	5.6e-175	C:nucleus; P:Cell cycle	.
Tc01_g012460	0	C:mitochondrion; F:ion binding; P:cellular protein modification process; P:biosynthetic process	.	Tc01_g005230	0	P:lipid metabolic process; C:cellular_component; F:molecular_function	.	Tc03_g021770	0	P:biological_process; C:ribosome; C:plastid; C:thylakoid	.	Tc02_g014770	1.01e-167	F:oxidoreductase activity; F:ion binding; P:photosynthesis; C:thylakoid	.
Tc01_g012520	0	F:transmembrane transporter activity; C:plasma membrane	.	Tc01_g005290	1.53e-179	P:secondary metabolic process; F:ion binding; F:methyltransferase activity; P:biosynthetic process	.	Tc03_g021780	0	P:signal transduction; C:intracellular	.	Tc02_g014910	0	F:transferase activity, transferring acyl groups	.
Tc01_g012550	0	P:lipid metabolic process; C:cellular_component; F:molecular_function	.	Tc01_g005300	1.6e-152	P:metabolic process; F:ligase activity	.	Tc03_g021790	1.12e-144	C:cellular_component	.	Tc02_g015070	1.24e-165	C:endoplasmic reticulum	.
Tc01_g012640	1.61e-78	P:carbohydrate metabolic process; F:hydrolase activity, acting on glycosyl bonds	.	Tc01_g005320	0	C:nucleus; F:RNA binding; P:anatomical structure development; P:cellular protein modification process; F:methyltransferase activity; C:protein complex; P:cellular nitrogen compound metabolic process; P:reproduction	.	Tc03_g021880	0	F:oxidoreductase activity; P:catabolic process; C:cell wall; F:ion binding; P:cell wall organization or biogenesis; C:extracellular region; P:Response to stress	.	Tc02_g015400	6.81e-84	C:cellular_component	.
Tc01_g012710	0	C:nucleus; F:DNA binding; P:transcription, DNA-templated; P:regulation of transcription, DNA-templated	.	Tc01_g005540	0	F:oxidoreductase activity; F:ion binding; P:biosynthetic process	.	Tc03_g022030	0	P:cellular protein modification process; C:cellular_component; F:kinase activity	.	Tc02_g015690	5.13e-102	F:transferase activity, transferring acyl groups; C:cytoplasm; P:cellular protein modification process; C:protein complex	.
Tc01_g013270	0	F:oxidoreductase activity; F:ion binding	.	Tc01_g005550	0	F:dioxygenase activity; F:iron ion binding; P:oxidation-reduction process; P:cellular response to starvation	.	Tc03_g022070	0	F:ATPase activity; F:DNA binding; F:nuclease activity; P:DNA metabolic process; P:Response to stress	.	Tc02_g015770	0	P:cellular protein modification process; F:kinase activity	.
Tc01_g013940	0	C:nucleus; F:transcription factor activity, sequence-specific DNA binding; P:regulation of transcription, DNA-templated; F:sequence-specific DNA binding	.	Tc01_g005600	0	C:extracellular space; P:catabolic process; F:peptidase activity; C:lysosome	.	Tc03_g022210	2.7e-108	C:cellular_component	.	Tc02_g015780	0	F:molecular_function	.
Tc01_g014040	2.7e-40	C:integral component of membrane; C:cytoplasmic, membrane-bounded vesicle	.	Tc01_g005640	0	F:nuclease activity	.	Tc03_g022230	0	F:transferase activity, transferring glycosyl groups; C:cellular_component	.	Tc02_g015820	0	P:transport	.
Tc01_g014260	0	P:cellular protein modification process; F:kinase activity; C:plasma membrane	.	Tc01_g005730	0	F:zinc ion binding; F:cinnamyl-alcohol dehydrogenase activity; C:integral component of membrane; P:oxidation-reduction process; F:sinapyl alcohol dehydrogenase activity	.	Tc03_g022340	0	F:transmembrane transporter activity; C:plasma membrane	.	Tc02_g016100	0	F:ion binding	.
Tc01_g014650	8e-170	C:membrane	.	Tc01_g005740	3.78e-159	F:oxidoreductase activity; F:ion binding	.	Tc03_g022640	0	P:carbohydrate metabolic process; F:transferase activity, transferring glycosyl groups; P:biosynthetic process; C:plastid	.	Tc02_g016200	7.01e-39	F:molecular_function	.
Tc01_g015580	0	P:cellular protein modification process; F:kinase activity; C:plasma membrane; P:reproduction	.	Tc01_g005760	1.5e-161	C:membrane	.	Tc03_g022650	0	P:carbohydrate metabolic process; C:plasma membrane; F:hydrolase activity, acting on glycosyl bonds	.	Tc02_g016510	8.81e-128	C:nucleus; F:DNA binding	.
Tc01_g015720	0	P:cellular protein modification process; F:kinase activity; C:plasma membrane	.	Tc01_g005850	4.19e-131	P:embryo development; P:reproduction	.	Tc03_g022730	0	C:cell; F:protein disulfide oxidoreductase activity; F:electron carrier activity; P:cell redox homeostasis; P:oxidation-reduction process	.	Tc02_g016540	0	C:cytoskeleton; P:cellular protein modification process; P:Cell cycle	.
Tc01_g015730	0	P:cellular protein modification process; F:kinase activity; C:plasma membrane	.	Tc01_g006040	0	C:nucleus; C:cytoplasm; P:cellular protein modification process; F:molecular_function	.	Tc03_g023390	0	C:nucleus; F:DNA binding; P:cellular nitrogen compound metabolic process; P:biosynthetic process	.	Tc02_g016710	1.71e-14	P:transport; F:molecular_function	.
Tc01_g016040	0	P:catabolic process	.	Tc01_g006190	0	F:oxidoreductase activity; F:ion binding; P:cellular protein modification process; C:cellular_component	.	Tc03_g023500	0	F:transferase activity, transferring acyl groups	.	Tc02_g016730	0	F:ion binding; P:cellular amino acid metabolic process; P:biosynthetic process	.
Tc01_g016100	0	P:RNA phosphodiester bond hydrolysis, endonucleolytic; F:RNA binding; F:ribonuclease III activity; P:RNA processing	.	Tc01_g006200	0	F:L-ascorbic acid binding; F:iron ion binding; F:oxidoreductase activity, acting on paired donors, with incorporation or reduction of molecular oxygen; C:integral component of membrane; P:oxidation-reduction process	.	Tc03_g024130	0	P:signal transduction; C:cellular_component; P:Response to stress	.	Tc02_g018320	2.8e-126	P:metabolic process; F:hydrolase activity	.
Tc01_g016130	3.39e-12	F:transmembrane transporter activity; C:plasma membrane	.	Tc01_g006340	0	C:cellular_component	.	Tc03_g024360	0	P:cellular protein modification process; C:cellular_component; F:kinase activity	.	Tc02_g019440	0	F:nucleotidyltransferase activity	.
Tc01_g016180	0	P:cellular protein modification process; C:cellular_component; F:kinase activity	.	Tc01_g006370	0	F:transferase activity, transferring acyl groups; P:cellular protein modification process; C:protein complex; C:intracellular	.	Tc03_g024380	5.44e-109	F:structural constituent of ribosome; C:mitochondrion; C:ribosome; P:translation	.	Tc02_g019700	0	F:ion binding; P:cellular amino acid metabolic process; P:biosynthetic process; F:kinase activity; C:plastid	.
Tc01_g016210	7.26e-175	C:cellular_component	.	Tc01_g006400	2.45e-145	F:DNA binding; F:ion binding	.	Tc03_g024840	0	C:nucleus; P:signal transduction; F:lipid binding	.	Tc02_g020570	0	P:cellular protein modification process; C:cellular_component; F:kinase activity	.
Tc01_g016420	0	P:biological_process; F:transferase activity, transferring glycosyl groups	.	Tc01_g006440	0	C:nucleus; F:transferase activity, transferring acyl groups; F:transcription factor activity, protein binding; F:ion binding; P:cellular protein modification process; P:cellular nitrogen compound metabolic process; P:biosynthetic process	.	Tc03_g024940	0	F:transmembrane transporter activity; C:cellular_component	.	Tc02_g020960	0	C:mitochondrion; P:tRNA metabolic process; F:transferase activity, transferring alkyl or aryl (other than methyl) groups	.
Tc01_g016730	0	P:catabolic process; F:peptidase activity	.	Tc01_g006470	0	F:ATPase activity; F:transmembrane transporter activity; F:ion binding; C:organelle; C:plasma membrane; C:intracellular	.	Tc03_g025020	0	P:pectin catabolic process; C:cell wall; F:aspartyl esterase activity; C:integral component of membrane; F:lyase activity; P:cell wall modification; F:pectinesterase activity	.	Tc02_g021310	2.35e-78	P:carbohydrate metabolic process; F:oxidoreductase activity; F:lyase activity; P:photosynthesis; P:biosynthetic process; C:plastid	.
Tc01_g016920	0	F:UDP-glucose 4-epimerase activity; F:UDP-arabinose 4-epimerase activity; C:integral component of membrane; P:galactose metabolic process	.	Tc01_g006790	0	F:nucleotidyltransferase activity; P:metabolic process; F:amino acid binding	.	Tc03_g025290	2.5e-37	P:lipid transport; F:lipid binding	.	Tc02_g022140	1.98e-80	P:small molecule metabolic process; C:cell; F:oxidoreductase activity; P:homeostatic process	.
Tc01_g017051	0	F:DNA binding	.	Tc01_g006820	1.25e-36	P:Cell proliferation; C:extracellular region; F:molecular_function	.	Tc03_g025300	1.68e-47	F:lipid binding; P:transport	.	Tc02_g022520	0	F:kinase activity	.
Tc01_g017320	0	C:nucleus; F:DNA binding; P:cellular nitrogen compound metabolic process; P:biosynthetic process	.	Tc01_g006880	0	F:lyase activity	.	Tc03_g025310	1.9e-44	C:integral component of membrane	.	Tc02_g023090	1.13e-81	F:DNA-directed RNA polymerase activity; P:RNA biosynthetic process	.
Tc01_g017630	0	C:cellular_component	.	Tc01_g006900	6e-168	F:nucleotide binding; F:nucleic acid binding	.	Tc03_g025320	0	F:transmembrane transporter activity; C:plasma membrane; P:Response to stress	.	Tc02_g023110	0	P:transmembrane transport; C:cellular_component; F:molecular_function	.
Tc01_g017660	0	P:protein complex assembly; C:cytoplasmic vesicle; C:cytoplasmic, membrane-bounded vesicle; F:lipid binding	.	Tc01_g007030	0	F:pyridoxal phosphate binding; F:catalytic activity; P:biosynthetic process	.	Tc03_g025390	0	F:DNA binding; F:nucleic acid binding transcription factor activity; P:cellular nitrogen compound metabolic process; P:biosynthetic process	.	Tc02_g023360	0	P:carbohydrate metabolic process; F:transferase activity, transferring acyl groups; C:Golgi apparatus; P:cell wall organization or biogenesis	.
Tc01_g017670	0	C:nucleus; C:cytoplasm	.	Tc01_g007040	0	F:DNA binding	.	Tc03_g025460	0	F:DNA binding; P:cellular component assembly; P:extracellular matrix organization; P:anatomical structure formation involved in morphogenesis; P:cellular nitrogen compound metabolic process; P:biosynthetic process	.	Tc02_g023630	0	C:cellular_component	.
Tc01_g017710	0	F:oxidoreductase activity; F:ion binding; P:biosynthetic process	.	Tc01_g007080	8.1e-178	C:nucleus; F:DNA binding; F:nucleic acid binding transcription factor activity; P:cellular nitrogen compound metabolic process; P:biosynthetic process	.	Tc03_g025500	0	F:oxidoreductase activity; C:cell wall; F:ion binding; C:plasma membrane	.	Tc02_g023850	0	P:small molecule metabolic process; P:carbohydrate metabolic process; F:transferase activity, transferring glycosyl groups; C:cytoplasm; F:ion binding; P:biosynthetic process; P:Response to stress	.
Tc01_g018210	1.38e-93	F:ion binding	.	Tc01_g007230	0	F:glucose binding; F:ATP binding; P:glucose 6-phosphate metabolic process; P:cellular glucose homeostasis; C:mitochondrion; P:glycolytic process; C:integral component of membrane; F:glucokinase activity; C:cytosol; F:mannokinase activity; P:carbohydrate phosphorylation; F:fructokinase activity	.	Tc03_g025520	0	C:plastid; C:thylakoid	.	Tc02_g023950	0	P:carbohydrate metabolic process; F:lyase activity; P:cell wall organization or biogenesis; C:extracellular region; F:hydrolase activity, acting on glycosyl bonds	.
Tc01_g018220	8.9e-95	F:calcium ion binding	.	Tc01_g007240	0	F:DNA binding; F:protein dimerization activity	.	Tc03_g025590	9.24e-148	F:enzyme regulator activity	.	Tc02_g024060	0	F:RNA binding	.
Tc01_g018790	0	F:molecular_function	.	Tc01_g007340	0	P:small molecule metabolic process; P:carbohydrate metabolic process; F:lyase activity; P:biosynthetic process; F:kinase activity	.	Tc03_g025620	2.57e-146	F:enzyme regulator activity	.	Tc02_g024180	0	C:integral component of membrane; C:Golgi apparatus; P:cell wall organization or biogenesis; F:O-acetyltransferase activity	.
Tc01_g018824	6.04e-153	F:nucleic acid binding; F:zinc ion binding; P:DNA integration; P:phosphorylation; F:kinase activity; F:hydrolase activity	.	Tc01_g007550	6.9e-87	C:nucleus; F:DNA binding; F:nucleic acid binding transcription factor activity; P:cellular nitrogen compound metabolic process; P:biosynthetic process	.	Tc03_g025800	0	F:oxidoreductase activity; F:ion binding; C:cellular_component	.	Tc02_g024480	0	C:cytoplasm; P:chromosome organization; P:chromosome segregation; P:Cell cycle; P:reproduction	.
Tc01_g018830	4.5e-132	C:integral component of membrane	.	Tc01_g007600	0	F:nuclease activity	.	Tc03_g025820	0	F:oxidoreductase activity; F:ion binding; C:cellular_component	.	Tc02_g025040	0	F:phosphatase activity; F:ion binding; P:cellular protein modification process	.
Tc01_g018870	0	P:carbohydrate metabolic process; F:transferase activity, transferring glycosyl groups; C:Golgi apparatus; P:biosynthetic process	.	Tc01_g007621	0	F:nucleic acid binding; F:zinc ion binding; P:DNA integration	.	Tc03_g026100	0	F:transmembrane transporter activity; C:plasma membrane	.	Tc02_g025080	0	C:cellular_component; F:molecular_function	.
Tc01_g019040	0	P:metabolic process; F:hydrolase activity	.	Tc01_g007730	0	F:oxidoreductase activity; F:ion binding	.	Tc03_g026220	0	C:cytoskeleton; P:cellular protein modification process; F:molecular_function; P:Cell cycle	.	Tc02_g025100	0	F:molecular_function	.
Tc01_g019090	6.1e-141	C:integral component of membrane	.	Tc01_g007760	2.11e-84	F:DNA binding; F:ion binding	.	Tc03_g026410	0	F:oxidoreductase activity	.	Tc02_g025380	0	F:oxidoreductase activity; P:catabolic process; F:ion binding; C:protein complex; F:peptidase activity; C:intracellular	.
Tc01_g019130	0	P:biological_process; F:transferase activity, transferring acyl groups	.	Tc01_g007940	0	P:cellular protein modification process; F:kinase activity	.	Tc03_g027100	0	F:RNA binding; C:nucleolus; C:plastid	.	Tc02_g025760	5.32e-114	F:ion binding; P:photosynthesis; C:protein complex; C:thylakoid	.
Tc01_g019500	3.8e-22	C:integral component of membrane	.	Tc01_g008150	0	C:mitochondrial membrane; P:transmembrane transport; F:structural constituent of ribosome; P:mitochondrial transport; C:integral component of membrane; P:translation	.	Tc03_g027250	0	P:biological_process; C:cytoskeleton; F:GTPase activity; F:structural molecule activity; C:Golgi apparatus	.	Tc02_g026390	1.1e-151	C:nuclear envelope; P:mitotic spindle assembly checkpoint; F:DNA binding; C:cytoplasm; C:kinetochore microtubule; C:chromocenter; C:kinetochore	.
Tc01_g019760	1.9e-12	C:integral component of membrane	.	Tc01_g008221	1.6e-158	F:nucleic acid binding	.	Tc03_g027380	0	P:biological_process; C:cytoskeleton; C:cytoplasm; F:GTPase activity; F:structural molecule activity	.	Tc02_g026770	0	P:cellular protein modification process; C:cellular_component; F:kinase activity	.
Tc01_g019770	1.9e-80	C:integral component of membrane; P:calcium ion transmembrane transport; F:calcium:proton antiporter activity	.	Tc01_g008240	2.8e-168	P:oxidation-reduction process; F:dihydrofolate reductase activity	.	Tc03_g027570	0	F:transmembrane transporter activity; P:homeostatic process; C:vacuole; C:plasma membrane	.	Tc02_g026960	1.4e-106	C:cytoplasm; P:homeostatic process; F:ion binding; P:transport	.
Tc01_g019790	0	C:integral component of membrane; P:calcium ion transmembrane transport; F:calcium:proton antiporter activity	.	Tc01_g008270	0	F:transmembrane transporter activity; C:cellular_component	.	Tc03_g027770	3.88e-110	F:ion binding; C:cellular_component	.	Tc02_g027190	1.56e-62	C:mitochondrion; F:ion binding; F:unfolded protein binding; P:protein folding; P:Response to stress	.
Tc01_g019830	1.26e-66	F:peptidase activity	.	Tc01_g008300	0	F:ion binding; C:cellular_component	.	Tc03_g027840	0	F:transferase activity, transferring glycosyl groups; C:cellular_component	.	Tc02_g028020	0	C:cellular_component	.
Tc01_g020280	0	P:ion transport; C:integral component of membrane; P:ionotropic glutamate receptor signaling pathway; F:ionotropic glutamate receptor activity	.	Tc01_g008310	0	F:molecular_function	.	Tc03_g028260	0	C:cellular_component	.	Tc02_g028070	0	P:carbohydrate metabolic process; C:plasma membrane; F:hydrolase activity, acting on glycosyl bonds	.
Tc01_g020290	0	P:ion transport; C:integral component of membrane; P:ionotropic glutamate receptor signaling pathway; F:ionotropic glutamate receptor activity	.	Tc01_g008560	0	F:ATPase activity; C:cellular_component	.	Tc03_g029120	1.82e-103	C:cellular_component	.	Tc02_g028250	2.6e-103	C:integral component of membrane	.
Tc01_g020390	7.79e-167	F:ion binding	.	Tc01_g008610	3.74e-54	P:small molecule metabolic process; P:biosynthetic process; F:transferase activity, transferring alkyl or aryl (other than methyl) groups	.	Tc03_g029150	5.54e-140	F:ion binding; P:Response to stress	.	Tc02_g028310	0	P:cellulose catabolic process; F:cellulase activity	.
Tc01_g020430	0	P:chromosome segregation; P:DNA metabolic process; C:plastid; P:Cell cycle; P:reproduction	.	Tc01_g008690	0	F:transferase activity, transferring hexosyl groups; P:metabolic process	.	Tc03_g029210	2.32e-117	F:ligase activity	.	Tc02_g028340	1.04e-136	F:enzyme regulator activity	.
Tc01_g020700	1.23e-84	P:small molecule metabolic process; C:peroxisome; P:protein targeting; P:transmembrane transport; P:catabolic process; P:lipid metabolic process	.	Tc01_g008840	0	F:ion binding	.	Tc03_g029250	0	C:cytoskeleton; P:cytoskeleton organization; F:oxidoreductase activity; P:homeostatic process; P:cellular component assembly	.	Tc02_g028370	2.84e-45	C:nucleus; F:DNA binding; P:chromosome organization; P:protein complex assembly; C:chromosome; C:protein complex; P:cellular nitrogen compound metabolic process; P:biosynthetic process	.
Tc01_g020760	1.1e-36	C:mitochondrion; P:tRNA metabolic process; P:cellular amino acid metabolic process; C:plastid; F:ligase activity; P:translation	.	Tc01_g008841	3.5e-154	P:RNA phosphodiester bond hydrolysis, endonucleolytic; F:nucleic acid binding; F:RNA-DNA hybrid ribonuclease activity; F:RNA-directed DNA polymerase activity; F:zinc ion binding; P:metabolic process; C:membrane; C:integral component of membrane; P:RNA-dependent DNA biosynthetic process; F:transferase activity	.	Tc03_g029890	1.88e-126	C:nucleus; F:DNA binding; F:lipid binding; P:cellular nitrogen compound metabolic process; P:biosynthetic process	.	Tc02_g028430	2.27e-37	C:plastid	.
Tc01_g020770	1e-177	P:phosphorylation; F:kinase activity	.	Tc01_g008880	0	P:catabolic process; P:cellular protein modification process; F:peptidase activity	.	Tc03_g029930	0	P:small molecule metabolic process; F:ion binding; P:biosynthetic process; F:kinase activity	.	Tc02_g028440	0	C:nucleus; C:plastid	.
Tc01_g020850	0	F:ATP binding; F:protein serine/threonine kinase activity; P:protein phosphorylation	.	Tc01_g008910	3.33e-174	C:cellular_component	.	Tc03_g030000	0	C:plasma membrane; F:molecular_function	.	Tc02_g029150	6.64e-170	F:DNA binding	.
Tc01_g020930	0	F:molecular_function	.	Tc01_g008920	4.47e-152	P:vesicle-mediated transport; P:signal transduction; C:cytosol; C:Golgi apparatus; P:vacuolar transport; F:molecular_function	.	Tc03_g030330	0	F:oxidoreductase activity; F:ion binding; C:cellular_component	.	Tc02_g029320	0	F:oxidoreductase activity; P:cellular protein modification process; C:cellular_component; F:kinase activity	.
Tc01_g020960	0	F:molecular_function	.	Tc01_g008960	0	F:transmembrane transporter activity; P:catabolic process; P:cellular component assembly; P:extracellular matrix organization; P:anatomical structure formation involved in morphogenesis; C:Golgi apparatus; C:endoplasmic reticulum; P:Response to stress	.	Tc03_g030350	0	P:small molecule metabolic process; P:carbohydrate metabolic process; C:cytosol; P:cellular nitrogen compound metabolic process; P:biosynthetic process; F:kinase activity; C:plastid	.	Tc02_g029590	0	P:Cell division; P:cytoskeleton organization; F:cytoskeletal protein binding; P:Cell cycle	.
Tc01_g021100	3.5e-61	C:membrane	.	Tc01_g009270	0	F:acyl-CoA dehydrogenase activity; C:peroxisome; F:acyl-CoA oxidase activity; P:fatty acid beta-oxidation; F:flavin adenine dinucleotide binding	.	Tc03_g030370	0	F:transmembrane transporter activity; P:biosynthetic process; C:plastid	.	Tc02_g030130	1.4e-172	P:dephosphorylation; F:acid phosphatase activity	.
Tc01_g021170	0	F:hydrolase activity, acting on carbon-nitrogen (but not peptide) bonds; C:cytoplasm; P:cofactor metabolic process; F:ion binding; P:cellular nitrogen compound metabolic process; P:biosynthetic process	.	Tc01_g009410	0	F:nucleic acid binding	.	Tc03_g030390	0	C:Golgi apparatus; C:plasma membrane	.	Tc02_g030240	0	F:oxidoreductase activity; P:cellular protein modification process; C:cellular_component; F:kinase activity	.
Tc01_g021500	0	P:carbohydrate metabolic process; F:transferase activity, transferring glycosyl groups; P:cell wall organization or biogenesis; C:extracellular region; F:hydrolase activity, acting on glycosyl bonds	.	Tc01_g009420	0	F:ion binding; P:biosynthetic process	.	Tc03_g030600	1.99e-123	C:plastid	.	Tc02_g030250	0	C:nucleus; F:ion binding; P:biosynthetic process; P:DNA metabolic process; P:Response to stress; P:Cell cycle	.
Tc01_g021900	0	P:signal transduction	.	Tc01_g009470	0	F:oxidoreductase activity, oxidizing metal ions; F:copper ion binding; P:oxidation-reduction process; C:extracellular region	.	Tc03_g030920	1.07e-123	F:molecular_function	.	Tc02_g030350	0	P:secondary metabolic process; F:oxidoreductase activity; P:cell morphogenesis; P:lipid metabolic process; P:cell wall organization or biogenesis; P:biosynthetic process; C:vacuole; C:plasma membrane; P:growth	.
Tc01_g022000	0	C:nucleus; F:DNA binding; P:transcription, DNA-templated; P:regulation of transcription, DNA-templated	.	Tc01_g010070	0	F:kinase activity	.	Tc04_g000060	1.78e-157	F:kinase activity	.	Tc02_g030500	4.82e-141	C:nucleus; P:anatomical structure development; C:cytosol	.
Tc01_g022110	8e-76	F:molecular_function	.	Tc01_g010140	1.29e-70	C:cellular_component	.	Tc04_g000070	1.22e-55	F:kinase activity	.	Tc02_g030550	8.35e-166	P:signal transduction; C:intracellular; F:molecular_function	.
Tc01_g022160	1.22e-118	F:ion binding; F:ligase activity	.	Tc01_g010220	1.23e-138	F:DNA binding; F:nucleic acid binding transcription factor activity; P:cellular nitrogen compound metabolic process; P:biosynthetic process	.	Tc04_g000080	1.89e-147	P:cellular protein modification process; F:kinase activity	.	Tc02_g030920	0	P:cellular protein modification process; C:cellular_component; F:kinase activity	.
Tc01_g022340	0	C:nucleus; C:cytoplasm	.	Tc01_g010230	1.05e-153	P:signal transduction; C:intracellular; F:molecular_function	.	Tc04_g000380	6.9e-101	F:ion binding; P:transport	.	Tc02_g031060	0	P:protein folding; C:plastid; F:molecular_function	.
Tc01_g022880	3.75e-115	F:ion binding	.	Tc01_g010400	0	F:transmembrane transporter activity; C:cellular_component	.	Tc04_g000840	0	C:nucleus; C:mitochondrion; C:plastid	.	Tc02_g031080	8.1e-142	F:transcription factor activity, sequence-specific DNA binding; P:regulation of transcription, DNA-templated; F:sequence-specific DNA binding	.
Tc01_g022890	0	P:carbohydrate metabolic process; P:catabolic process; F:lyase activity; F:ion binding	.	Tc01_g010910	1.73e-147	F:ion binding; C:cellular_component	.	Tc04_g000930	0	C:cellular_component; F:molecular_function	.	Tc02_g031720	0	C:nucleus; F:DNA binding	.
Tc01_g022950	0	F:zinc ion binding; F:oxidoreductase activity; P:oxidation-reduction process	.	Tc01_g010930	1.3e-155	F:zinc ion binding; C:integral component of membrane	.	Tc04_g000960	0	C:nucleus; P:generation of precursor metabolites and energy; P:photosynthesis; F:peptidase activity; C:plastid; C:thylakoid	.	Tc02_g031760	0	P:carbohydrate metabolic process; F:transferase activity, transferring glycosyl groups; C:cytosol; C:Golgi apparatus; P:biosynthetic process; P:cellular nitrogen compound metabolic process; F:isomerase activity	.
Tc01_g025071	0	F:kinase activity	.	Tc01_g011030	0	P:cellular protein modification process; F:kinase activity; C:plasma membrane; P:reproduction	.	Tc04_g001040	0	F:oxidoreductase activity; P:lipid metabolic process; P:biosynthetic process	.	Tc02_g032050	0	F:kinase activity	.
Tc01_g025400	0	P:DNA metabolic process; F:molecular_function; P:Response to stress	.	Tc01_g011040	0	P:cellular protein modification process; C:cellular_component; F:kinase activity	.	Tc04_g001570	1.2e-115	P:metabolic process; F:carbamoyl-phosphate synthase (glutamine-hydrolyzing) activity	.	Tc02_g032170	1.33e-95	C:cellular_component	.
Tc01_g025420	0	P:signal transduction; P:cellular protein modification process; F:kinase activity; C:intracellular	.	Tc01_g011060	0	P:cellular protein modification process; F:kinase activity; C:plasma membrane; P:reproduction	.	Tc04_g001590	0	P:Cell division	.	Tc02_g032180	0	C:protein complex; P:transport; C:plastid; F:molecular_function; C:thylakoid	.
Tc01_g025460	0	C:cytoskeleton; C:cytoplasm; P:cellular protein modification process; F:kinase activity	.	Tc01_g011070	0	F:ATP binding; P:recognition of pollen; C:integral component of membrane; F:protein serine/threonine kinase activity; P:protein phosphorylation; C:plasma membrane	.	Tc04_g001880	0	P:carbohydrate metabolic process; F:isomerase activity	.	Tc02_g032470	9.71e-162	P:biological_process; F:transferase activity, transferring glycosyl groups	.
Tc01_g025660	0	P:vesicle-mediated transport; C:cytoplasm; P:protein complex assembly; C:protein complex	.	Tc01_g011140	0	P:cellular protein modification process; F:kinase activity	.	Tc04_g002010	0	F:molecular_function	.	Tc02_g032480	2.26e-136	P:biological_process; F:transferase activity, transferring glycosyl groups	.
Tc01_g025700	0	F:oxidoreductase activity; P:cellular protein modification process; F:signal transducer activity; F:kinase activity; C:intracellular	.	Tc01_g011230	5e-127	C:nucleus; P:signal transduction; F:kinase activity; P:Response to stress; P:immune system process	.	Tc04_g002530	0	F:translation initiation factor activity; P:translational initiation	.	Tc02_g032490	0	P:biological_process; F:transferase activity, transferring glycosyl groups	.
Tc01_g026030	0	P:cellular nitrogen compound metabolic process	.	Tc01_g011320	0	P:signal transduction; C:cellular_component	.	Tc04_g003320	0	F:ATPase activity; C:nucleus; P:cytoskeleton organization; P:DNA metabolic process; P:Response to stress	.	Tc02_g032640	0	C:bub1-bub3 complex; P:mitotic spindle assembly checkpoint; F:ubiquitin binding; C:mitotic checkpoint complex; C:kinetochore; C:phragmoplast	.
Tc01_g026150	0	P:anatomical structure development; P:cellular protein modification process; C:cellular_component; F:kinase activity	.	Tc01_g011430	0	P:carbohydrate metabolic process; P:catabolic process; C:cell wall; P:cell wall organization or biogenesis; F:enzyme regulator activity	.	Tc04_g003350	3.33e-86	F:structural constituent of ribosome; C:ribosome; C:plastid; C:thylakoid; P:translation	.	Tc02_g033080	2.24e-125	F:ligase activity	.
Tc01_g026470	5.59e-32	F:dioxygenase activity; F:oxidoreductase activity; F:metal ion binding; P:oxidation-reduction process	.	Tc01_g011500	0	F:squalene monooxygenase activity; F:flavin adenine dinucleotide binding; C:integral component of membrane; P:oxidation-reduction process; P:sterol biosynthetic process; P:response to water deprivation	.	Tc04_g003380	0	F:transmembrane transporter activity; C:cellular_component	.	Tc02_g033190	0	C:nucleus; F:DNA binding; P:cellular nitrogen compound metabolic process; P:biosynthetic process	.
Tc01_g026480	7.29e-18	F:oxidoreductase activity; F:ion binding	.	Tc01_g011540	0	F:zinc ion binding; P:oxidation-reduction process; F:alcohol dehydrogenase (NAD) activity	.	Tc04_g004770	6.16e-136	C:plasma membrane	.	Tc02_g033240	1.74e-82	F:RNA binding; F:nuclease activity	.
Tc01_g026710	0	F:ubiquitin-protein transferase activity; C:Cul3-RING ubiquitin ligase complex; P:protein ubiquitination	.	Tc01_g011550	0	F:zinc ion binding; P:oxidation-reduction process; F:alcohol dehydrogenase (NAD) activity	.	Tc04_g005030	3.62e-51	C:cellular_component	.	Tc02_g033250	7e-152	P:anthocyanin-containing compound biosynthetic process; P:RNA phosphodiester bond hydrolysis, endonucleolytic; F:RNA binding; C:cell wall; C:extracellular region; C:plasma membrane; F:ribonuclease T2 activity	.
Tc01_g026970	0	P:lipid metabolic process; F:molecular_function	.	Tc01_g011560	0	F:structural constituent of ribosome; P:regulation of DNA-templated transcription, elongation; C:ribosome; P:regulation of transcription from RNA polymerase II promoter; P:translation	.	Tc04_g005080	0	F:androstan-3-alpha,17-beta-diol dehydrogenase activity; P:oxidation-reduction process	.	Tc02_g033280	4.53e-171	F:transmembrane transporter activity; C:cellular_component	.
Tc01_g027020	0	P:carbohydrate metabolic process; F:transferase activity, transferring glycosyl groups; C:Golgi apparatus; P:cell wall organization or biogenesis; P:biosynthetic process	.	Tc01_g011580	0	F:oxidoreductase activity; P:lipid metabolic process; P:biosynthetic process; C:cellular_component; P:Response to stress	.	Tc04_g005310	0	F:oxidoreductase activity; P:cellular protein modification process; C:cellular_component; F:kinase activity	.	Tc02_g033550	0	C:nucleus; F:DNA binding; F:nucleic acid binding transcription factor activity; P:cellular nitrogen compound metabolic process; P:biosynthetic process	.
Tc01_g027261	0	F:ion binding	.	Tc01_g011600	0	F:molecular_function	.	Tc04_g007290	0	P:carbohydrate metabolic process; F:oxidoreductase activity, acting on the CH-OH group of donors, quinone or similar compound as acceptor; F:quinone binding; C:integral component of membrane; P:oxidation-reduction process	.	Tc02_g033660	1.55e-125	F:oxidoreductase activity; C:cellular_component	.
Tc01_g027300	0	F:iron ion binding; F:aromatase activity; C:integral component of membrane; P:oxidation-reduction process; F:heme binding	.	Tc01_g011640	0	F:oxidoreductase activity; P:lipid metabolic process; P:biosynthetic process; C:cellular_component; P:Response to stress	.	Tc04_g007300	0	P:cell morphogenesis; P:Cell differentiation; F:cytoskeletal protein binding; P:reproduction; P:growth	.	Tc02_g033830	0	F:DNA binding; F:nucleic acid binding transcription factor activity; P:cellular nitrogen compound metabolic process; P:biosynthetic process; P:Cell cycle	.
Tc01_g027310	0	C:cellular_component	.	Tc01_g011850	0	C:integral component of membrane	.	Tc04_g009060	1.23e-29	C:nucleus; C:cytoplasm; F:signal transducer activity; F:kinase activity; F:enzyme binding	.	Tc02_g033910	0	P:cellular protein modification process; C:cellular_component; F:kinase activity	.
Tc01_g028020	0	F:ion binding	.	Tc01_g012000	0	P:cellular protein modification process; F:molecular_function	.	Tc04_g010220	0	C:cytoskeleton; P:cellular protein modification process; P:Cell cycle	.	Tc02_g033990	5.76e-158	C:nucleus; F:DNA binding; P:chromosome organization; P:homeostatic process; C:cytoplasmic chromosome; P:biosynthetic process; P:DNA metabolic process; C:plastid; P:Response to stress	.
Tc01_g028030	8.85e-79	F:lipid binding; C:cellular_component; P:transport	.	Tc01_g012460	0	C:mitochondrion; F:ion binding; P:cellular protein modification process; P:biosynthetic process	.	Tc04_g010480	0	P:carbohydrate metabolic process; F:ion binding; F:hydrolase activity, acting on glycosyl bonds	.	Tc02_g034150	0	P:carbohydrate metabolic process; F:hydrolase activity, acting on glycosyl bonds	.
Tc01_g028250	0	F:transmembrane transporter activity; C:plasma membrane; C:plastid	.	Tc01_g012520	0	C:integral component of plasma membrane; F:L-amino acid transmembrane transporter activity; P:L-alpha-amino acid transmembrane transport; F:antiporter activity	.	Tc04_g010610	2.7e-60	C:nucleus	.	Tc02_g034200	0	C:cellular_component; P:transport; F:molecular_function	.
Tc01_g028510	0	F:ATPase activity; F:transmembrane transporter activity; F:ion binding; C:organelle; C:plasma membrane; C:intracellular	.	Tc01_g012550	0	P:lipid metabolic process; C:cellular_component; F:molecular_function	.	Tc04_g010980	4.54e-92	C:cellular_component	.	Tc02_g034470	0	F:transmembrane transporter activity; C:plasma membrane	.
Tc01_g028530	3.11e-141	F:ion binding	.	Tc01_g012710	0	C:nucleus; F:DNA binding; P:cellular nitrogen compound metabolic process; P:biosynthetic process	.	Tc04_g011550	0	C:cellular_component; P:transport; F:molecular_function	.	Tc02_g034580	0	P:generation of precursor metabolites and energy; P:cellular protein modification process; P:photosynthesis; F:kinase activity; C:plastid	.
Tc01_g028690	0	F:molecular_function	.	Tc01_g013270	0	F:oxidoreductase activity; F:ion binding	.	Tc04_g012360	0	P:cellular protein modification process; F:kinase activity	.	Tc02_g034710	1.65e-142	F:oxidoreductase activity; C:cellular_component	.
Tc01_g028770	6.69e-144	F:oxidoreductase activity; P:biosynthetic process; P:cellular nitrogen compound metabolic process	.	Tc01_g013350	0	C:cellular_component; F:molecular_function	.	Tc04_g012730	1.1e-90	F:ATP binding; C:membrane; C:integral component of membrane; F:protein kinase activity; P:phosphorylation; P:protein phosphorylation; F:kinase activity	.	Tc02_g035010	0	F:oxidoreductase activity; C:cell wall; F:ion binding	.
Tc01_g028960	1.6e-62	C:membrane; F:binding	.	Tc01_g013910	0	P:cellular protein modification process; C:cellular_component; F:kinase activity	.	Tc04_g012780	0	P:cellular protein modification process; C:cellular_component; F:kinase activity	.	Tc03_g000390	0	C:nucleus; C:transcription factor complex; F:DNA binding; F:transcription factor activity, sequence-specific DNA binding; P:transcription, DNA-templated; P:regulation of transcription, DNA-templated	.
Tc01_g029150	0	P:cellular protein modification process; F:kinase activity; C:plasma membrane	.	Tc01_g013940	0	C:nucleus; F:DNA binding; F:nucleic acid binding transcription factor activity; P:cellular nitrogen compound metabolic process; P:biosynthetic process	.	Tc04_g013170	0	P:carbohydrate metabolic process; F:hydrolase activity, acting on glycosyl bonds	.	Tc03_g000470	0	P:cellular protein modification process; F:kinase activity	.
Tc01_g029380	0	F:RNA binding	.	Tc01_g014040	2.7e-40	C:integral component of membrane; C:cytoplasmic, membrane-bounded vesicle	.	Tc04_g013930	0	P:biological_process; F:molecular_function	.	Tc03_g000620	0	P:transmembrane transport; C:cellular_component; F:molecular_function	.
Tc01_g029390	0	P:transmembrane transport; F:structural constituent of ribosome; C:cellular_component; P:translation	.	Tc01_g014100	0	F:nuclease activity; P:DNA metabolic process	.	Tc04_g014560	7.71e-131	F:DNA binding; P:signal transduction; F:ion binding; P:Cell differentiation; P:anatomical structure development; C:cytosol; C:ribosome	.	Tc03_g000780	0	P:catabolic process; F:ion binding; C:cellular_component	.
Tc01_g029560	0	F:transmembrane transporter activity; P:homeostatic process; C:vacuole; C:plasma membrane; P:Response to stress	.	Tc01_g014170	0	F:peptidase activity	.	Tc04_g014690	7.67e-55	F:ligase activity	.	Tc03_g001100	7.05e-164	F:DNA binding	.
Tc01_g029690	0	F:DNA binding; F:ion binding; C:intracellular	.	Tc01_g014260	0	F:ATP binding; F:protein serine/threonine kinase activity; P:protein phosphorylation; C:plasma membrane	.	Tc04_g015160	0	F:peptidase activity; C:cellular_component	.	Tc03_g001280	0	P:embryo development; C:nucleus; F:DNA binding; P:cellular nitrogen compound metabolic process; P:biosynthetic process; P:reproduction	.
Tc01_g030191	0	F:nucleotidyltransferase activity; F:nuclease activity; P:biosynthetic process; P:DNA metabolic process; C:cellular_component	.	Tc01_g014630	0	P:small molecule metabolic process; F:transferase activity, transferring glycosyl groups; F:ion binding; C:cytosol; P:cellular nitrogen compound metabolic process; P:biosynthetic process; F:kinase activity; C:plasma membrane	.	Tc04_g015420	0	F:aspartic-type endopeptidase activity; P:protein catabolic process; P:proteolysis; C:integral component of membrane; C:extracellular region	.	Tc03_g001470	0	C:cellular_component	.
Tc01_g030310	5.4e-152	F:translation elongation factor activity; C:membrane; P:translational elongation	.	Tc01_g014640	0	F:glycerol-3-phosphate 2-O-acyltransferase activity; P:cutin biosynthetic process; P:pollen sperm Cell differentiation; C:mitochondrion; C:integral component of membrane; F:phosphatase activity; F:glycerol-3-phosphate O-acyltransferase activity; P:dephosphorylation	.	Tc04_g015440	0	F:flavonoid 3'-monooxygenase activity; C:nucleus; F:DNA binding; F:iron ion binding; P:transcription, DNA-templated; P:secondary metabolite biosynthetic process; C:integral component of membrane; P:regulation of transcription, DNA-templated; P:oxidation-reduction process; F:heme binding	.	Tc03_g002210	2.64e-17	C:cellular_component	.
Tc01_g030430	0	P:small molecule metabolic process; C:nucleus; P:cell death; P:catabolic process; F:ion binding; P:cellular protein modification process; P:biosynthetic process; C:plasma membrane; P:Response to stress; P:immune system process; F:ligase activity	.	Tc01_g014650	8e-170	C:membrane	.	Tc04_g015680	0	F:oxidoreductase activity; P:cellular protein modification process; C:cellular_component; F:kinase activity	.	Tc03_g002470	1.41e-172	C:nucleus; F:DNA binding; P:cellular nitrogen compound metabolic process; P:biosynthetic process	.
Tc01_g030580	0	C:cellular_component	.	Tc01_g015580	0	F:ATP binding; P:recognition of pollen; C:integral component of membrane; F:protein serine/threonine kinase activity; P:protein phosphorylation; C:plasma membrane	.	Tc04_g016490	0	F:transmembrane transporter activity; C:plasma membrane	.	Tc03_g003290	0	C:cellular_component	.
Tc01_g030720	2.1e-48	P:Response to stress	.	Tc01_g015720	0	F:ATP binding; C:integral component of membrane; F:protein serine/threonine kinase activity; P:protein phosphorylation; C:plasma membrane	.	Tc04_g016550	0	F:DNA binding; C:integral component of membrane	.	Tc03_g003320	0	C:nucleus; F:DNA binding; F:nucleic acid binding transcription factor activity; P:cellular nitrogen compound metabolic process; P:biosynthetic process	.
Tc01_g030770	0	P:vesicle-mediated transport; C:cytoplasm; C:protein complex	.	Tc01_g015730	0	F:ATP binding; C:integral component of membrane; F:protein serine/threonine kinase activity; P:protein phosphorylation; C:plasma membrane	.	Tc04_g016680	0	P:lipid metabolic process; C:cytosol	.	Tc03_g003350	1.69e-130	C:plastid; C:thylakoid	.
Tc01_g030830	4.68e-158	P:Cell proliferation; F:ion binding; P:anatomical structure development; C:cytosol; C:nucleolus; C:ribosome; F:rRNA binding; C:vacuole; C:plasma membrane; C:plastid	.	Tc01_g016100	0	P:RNA phosphodiester bond hydrolysis, endonucleolytic; F:RNA binding; F:ribonuclease III activity; P:RNA processing	.	Tc04_g016710	0	F:oxidoreductase activity; C:cellular_component	.	Tc03_g004260	0	F:ATPase activity; F:ATP binding; F:microtubule motor activity; P:metabolic process; P:cytokinesis by cell plate formation; P:pollen development; C:kinesin complex; P:microtubule-based movement; P:embryo sac cellularization; C:microtubule; F:microtubule binding	.
Tc01_g030860	0	P:pectin catabolic process; P:negative regulation of catalytic activity; C:cell wall; F:aspartyl esterase activity; F:pectinesterase inhibitor activity; P:cell wall modification; F:pectinesterase activity	.	Tc01_g016130	3.39e-12	F:transmembrane transporter activity; C:plasma membrane	.	Tc04_g016980	0	F:oxidoreductase activity; F:ion binding	.	Tc03_g004720	0	F:transmembrane transporter activity; C:cellular_component	.
Tc01_g031030	9.23e-154	C:nucleus; F:DNA binding; F:nucleic acid binding transcription factor activity; P:cellular nitrogen compound metabolic process; P:biosynthetic process	.	Tc01_g016140	0	P:biological_process; F:transferase activity, transferring glycosyl groups	.	Tc04_g017440	3.6e-121	C:integral component of membrane	.	Tc03_g004830	0	P:carbohydrate metabolic process; F:hydrolase activity, acting on glycosyl bonds	.
Tc01_g031090	0	P:small molecule metabolic process; P:generation of precursor metabolites and energy; P:protein complex assembly; C:mitochondrion; F:lyase activity; C:cytosol; C:protein complex	.	Tc01_g016180	0	P:cellular protein modification process; C:cellular_component; F:kinase activity	.	Tc04_g018280	0	F:kinase activity	.	Tc03_g004840	0	C:nucleus; F:DNA binding; F:nuclease activity; P:DNA metabolic process; P:Response to stress	.
Tc01_g031100	2.66e-114	C:nucleus; C:cytoplasm; P:signal transduction; F:ion binding; P:cellular protein modification process; F:enzyme regulator activity; P:Response to stress	.	Tc01_g016280	0	F:zinc ion binding	.	Tc04_g018990	1.06e-124	F:ADP binding; P:defense response	.	Tc03_g005310	1.01e-133	P:cellular protein modification process; C:endoplasmic reticulum; P:protein folding; F:isomerase activity	.
Tc01_g031480	0	F:unfolded protein binding; P:protein folding	.	Tc01_g016730	0	P:catabolic process; F:peptidase activity	.	Tc04_g019100	7.86e-123	P:signal transduction; C:plastid; F:enzyme binding	.	Tc03_g005600	0	P:biological_process; C:cytoskeleton; C:cytoplasm; F:GTPase activity; F:structural molecule activity	.
Tc01_g031490	0	P:lipid metabolic process; C:integral component of membrane; F:hydrolase activity	.	Tc01_g016920	0	F:UDP-glucose 4-epimerase activity; F:UDP-arabinose 4-epimerase activity; C:integral component of membrane; P:galactose metabolic process	.	Tc04_g019510	3.9e-45	C:membrane; C:integral component of membrane	.	Tc03_g006900	0	P:cellular protein modification process; C:cellular_component; F:kinase activity	.
Tc01_g031670	4.9e-89	F:transcription factor activity, sequence-specific DNA binding; F:protein heterodimerization activity; P:positive regulation of transcription, DNA-templated; F:sequence-specific DNA binding; P:positive regulation of seed maturation	.	Tc01_g016930	2.58e-120	P:proteolysis; F:peptidase activity; C:plasma membrane	.	Tc04_g019740	0	C:nucleus; F:DNA binding; F:nucleic acid binding transcription factor activity; P:cellular nitrogen compound metabolic process; P:biosynthetic process	.	Tc03_g007010	0	P:Cell division	.
Tc01_g031880	0	C:endosome; C:Golgi apparatus; F:molecular_function	.	Tc01_g017051	0	F:DNA binding	.	Tc04_g019960	0	F:RNA binding; C:nucleolus; C:plastid	.	Tc03_g008290	0	P:generation of precursor metabolites and energy; F:ion binding; P:cellular protein modification process; P:photosynthesis; C:protein complex; C:plastid; C:thylakoid	.
Tc01_g032140	0	F:nucleotidyltransferase activity; F:nuclease activity; P:biosynthetic process; P:DNA metabolic process; C:cellular_component	.	Tc01_g017360	0	F:oxidoreductase activity; P:cofactor metabolic process; P:biosynthetic process; P:cellular nitrogen compound metabolic process	.	Tc04_g019970	1.69e-154	P:signal transduction; C:intracellular; F:molecular_function	.	Tc03_g008390	9.83e-107	C:protein complex; C:plastid; F:molecular_function; C:thylakoid	.
Tc01_g032310	0	F:iron ion binding; F:gibberellin 3-beta-dioxygenase activity; P:gibberellin catabolic process; P:oxidation-reduction process; P:response to light stimulus; F:C-19 gibberellin 2-beta-dioxygenase activity	.	Tc01_g017630	0	C:cellular_component	.	Tc04_g020020	0	P:biological_process; F:cytoskeletal protein binding	.	Tc03_g009500	0	F:ATP binding; C:integral component of membrane; F:protein serine/threonine kinase activity; P:protein phosphorylation	.
Tc01_g032340	0	C:nucleus; F:DNA binding; P:cellular nitrogen compound metabolic process; P:biosynthetic process; P:Response to stress	.	Tc01_g017660	0	P:clathrin coat assembly; F:clathrin binding; C:clathrin-coated vesicle; F:1-phosphatidylinositol binding	.	Tc04_g020230	0	P:metabolic process; C:integral component of membrane; F:isomerase activity	.	Tc03_g009550	0	C:integral component of membrane; P:transport; F:transporter activity	.
Tc01_g032360	0	P:response to cold; F:inositol 3-alpha-galactosyltransferase activity; P:galactose metabolic process	.	Tc01_g017670	0	C:nucleus; C:cytoplasm	.	Tc04_g020360	7.9e-58	P:cell communication; C:extracellular region; P:single organism signaling; F:signal transducer activity	.	Tc03_g009850	0	F:kinase activity; C:plasma membrane	.
Tc01_g032390	4.6e-119	P:signal transduction; C:cytosol; C:Golgi apparatus; C:vacuole; F:enzyme regulator activity; C:plastid	.	Tc01_g017710	0	F:oxidoreductase activity; F:ion binding; P:biosynthetic process	.	Tc04_g020370	1.48e-63	F:signal transducer activity; C:intracellular	.	Tc03_g010350	6.1e-161	F:peptidase activity	.
Tc01_g032460	6.8e-43	P:regulation of systemic acquired resistance	.	Tc01_g017750	0	F:zinc ion binding	.	Tc04_g020450	2.47e-73	F:signal transducer activity; C:intracellular	.	Tc03_g011030	0	F:oxidoreductase activity; P:cofactor metabolic process; P:tRNA metabolic process; P:photosynthesis; P:biosynthetic process	.
Tc01_g032490	0	P:cellular protein modification process; F:kinase activity	.	Tc01_g017790	0	F:hydrolase activity, acting on ester bonds; P:lipid catabolic process	.	Tc04_g020780	0	P:carbohydrate metabolic process; F:transferase activity, transferring glycosyl groups; C:Golgi apparatus	.	Tc03_g011050	0	F:oxidoreductase activity; P:lipid metabolic process	.
Tc01_g032500	0	F:phosphatase activity; F:ion binding; P:cellular protein modification process	.	Tc01_g018060	0	C:cellular_component	.	Tc04_g021140	0	F:phosphatase activity; F:ion binding; C:cellular_component	.	Tc03_g011930	0	F:oxidoreductase activity; F:ion binding; C:cellular_component	.
Tc01_g032570	0	F:oxidoreductase activity; P:catabolic process; F:ion binding; C:extracellular region; P:Response to stress	.	Tc01_g018210	1.38e-93	F:ion binding	.	Tc04_g021170	0	F:molecular_function; P:Response to stress	.	Tc03_g012200	0	C:nucleus; F:DNA binding; P:biosynthetic process; P:DNA metabolic process; P:Response to stress	.
Tc01_g032620	0	F:ion binding	.	Tc01_g018220	8.9e-95	F:calcium ion binding	.	Tc04_g021360	0	C:cytoplasmic chromosome; F:unfolded protein binding; P:protein folding; C:plastid; C:thylakoid; F:isomerase activity	.	Tc03_g012250	4.7e-93	P:cellular nitrogen compound metabolic process; P:biosynthetic process; C:plastid; C:thylakoid	.
Tc01_g032650	9.8e-103	C:chloroplast; C:integral component of membrane; P:photosynthesis, light harvesting; P:protein-chromophore linkage; F:chlorophyll binding; C:thylakoid	.	Tc01_g018790	0	F:molecular_function	.	Tc04_g022390	4.78e-168	F:ion binding	.	Tc03_g012650	2.3e-161	P:proteolysis; P:Response to stress; F:metallopeptidase activity	.
Tc01_g032660	0	P:small molecule metabolic process; P:sulfur compound metabolic process; C:cytoplasm; P:cofactor metabolic process; F:ion binding; P:biosynthetic process; F:transferase activity, transferring alkyl or aryl (other than methyl) groups	.	Tc01_g018824	6.04e-153	F:nucleic acid binding; F:zinc ion binding; P:DNA integration; P:phosphorylation; F:kinase activity; F:hydrolase activity	.	Tc04_g022590	4.03e-112	F:ligase activity	.	Tc03_g012850	0	F:DNA binding; F:zinc ion binding	.
Tc01_g032670	1.3e-77	P:metabolic process; C:integral component of membrane; F:hydrolase activity, hydrolyzing O-glycosyl compounds; C:anchored component of plasma membrane; F:polysaccharide binding	.	Tc01_g018830	4.5e-132	C:integral component of membrane	.	Tc04_g022630	0	P:cellular amino acid metabolic process; P:biosynthetic process; F:ligase activity	.	Tc03_g013500	0	F:ATPase activity; F:ATP binding; F:microtubule motor activity; P:metabolic process; C:kinesin complex; P:microtubule-based movement; C:microtubule; F:microtubule binding	.
Tc01_g032710	0	F:ATPase activity; C:cellular_component; P:transport	.	Tc01_g018870	0	P:carbohydrate metabolic process; F:transferase activity, transferring glycosyl groups; C:Golgi apparatus; P:biosynthetic process	.	Tc04_g022860	0	C:cellular_component	.	Tc03_g013860	8.65e-61	P:chromosome organization; P:protein complex assembly; P:DNA metabolic process; C:cellular_component; P:Response to stress	.
Tc01_g032810	0	F:transmembrane transporter activity; F:ion binding; C:vacuole	.	Tc01_g018980	4.12e-89	C:nucleus; F:DNA binding; P:cellular nitrogen compound metabolic process; P:biosynthetic process	.	Tc04_g022920	3.5e-66	C:cytoplasm; F:metal ion binding; C:cell wall; P:metal ion transport	.	Tc03_g013960	0	C:extracellular space; P:catabolic process; F:peptidase activity; C:lysosome	.
Tc01_g032820	0	F:transferase activity, transferring acyl groups	.	Tc01_g019040	0	P:metabolic process; F:hydrolase activity	.	Tc04_g022940	9.73e-144	C:nucleus; P:cell death; C:cytoplasm; P:signal transduction; F:phosphatase activity; P:cellular protein modification process; C:plasma membrane; P:Response to stress; P:immune system process	.	Tc03_g014090	0	C:nucleus; F:nuclease activity; F:lyase activity; F:ion binding; P:DNA metabolic process; P:Response to stress	.
Tc01_g032830	0	F:ATPase activity; F:transmembrane transporter activity; C:cellular_component	.	Tc01_g019090	6.1e-141	C:integral component of membrane	.	Tc04_g023490	0	P:small molecule metabolic process; F:oxidoreductase activity; P:lipid metabolic process; F:ion binding; P:biosynthetic process; C:cellular_component	.	Tc03_g014660	0	F:DNA binding; F:RNA binding; F:ion binding; C:plastid	.
Tc01_g032840	0	F:ATPase activity; F:transmembrane transporter activity; C:cellular_component	.	Tc01_g019130	0	P:biological_process; F:transferase activity, transferring acyl groups	.	Tc04_g023500	1.09e-137	P:photosynthesis; C:protein complex; C:thylakoid	.	Tc03_g014680	0	P:small molecule metabolic process; F:transferase activity, transferring glycosyl groups; C:cytosol; P:cellular nitrogen compound metabolic process; P:biosynthetic process; F:kinase activity; C:plastid	.
Tc01_g032950	0	P:carbohydrate metabolic process; P:catabolic process; P:cell wall organization or biogenesis; C:cellular_component; F:hydrolase activity, acting on glycosyl bonds	.	Tc01_g019500	3.8e-22	C:integral component of membrane	.	Tc04_g023670	0	P:signal transduction; P:cellular protein modification process; C:cytosol; F:kinase activity	.	Tc03_g015020	0	P:biological_process; F:molecular_function	.
Tc01_g033190	0	C:cell wall; P:cell wall organization or biogenesis; C:extracellular region	.	Tc01_g019770	2e-80	C:integral component of membrane; P:calcium ion transmembrane transport; F:calcium:proton antiporter activity	.	Tc04_g024060	0	F:helicase activity; P:symbiosis, encompassing mutualism through parasitism; P:Response to stress; P:immune system process	.	Tc03_g015110	0	C:nucleus; F:DNA binding	.
Tc01_g033260	5.48e-92	C:intracellular; F:molecular_function	.	Tc01_g019790	0	C:integral component of membrane; P:calcium ion transmembrane transport; F:calcium:proton antiporter activity	.	Tc04_g024180	0	F:cytoskeletal protein binding; C:cellular_component; F:kinase activity	.	Tc03_g015160	5.9e-91	P:cellular transition metal ion homeostasis; F:transition metal ion binding; C:cytoplasm; P:metal ion transport	.
Tc01_g033390	0	C:cellular_component; F:molecular_function	.	Tc01_g019830	1.26e-66	F:peptidase activity	.	Tc04_g024260	0	C:plasma membrane	.	Tc03_g015680	0	P:secondary metabolic process; F:transferase activity, transferring acyl groups; P:catabolic process; F:peptidase activity	.
Tc01_g033400	5.76e-82	C:cellular_component	.	Tc01_g020280	0	P:ion transport; C:integral component of membrane; P:ionotropic glutamate receptor signaling pathway; F:ionotropic glutamate receptor activity	.	Tc04_g024360	2.26e-126	C:cellular_component	.	Tc03_g015780	0	P:small molecule metabolic process; P:carbohydrate metabolic process; F:ion binding; P:cellular protein modification process; F:hydrolase activity, acting on glycosyl bonds	.
Tc01_g033440	0	C:cellular_component	.	Tc01_g020290	0	P:ion transport; C:integral component of membrane; P:ionotropic glutamate receptor signaling pathway; F:ionotropic glutamate receptor activity	.	Tc04_g024440	0	F:ATPase activity; C:nucleus; F:DNA binding; P:DNA metabolic process; P:Response to stress; P:Cell cycle; P:reproduction	.	Tc03_g015810	0	F:DNA binding	.
Tc01_g033470	0	C:nucleus; F:DNA binding; P:cellular nitrogen compound metabolic process; P:biosynthetic process	.	Tc01_g020390	7.79e-167	F:ion binding	.	Tc04_g024780	0	F:DNA binding; F:ion binding; P:growth	.	Tc03_g015840	0	F:RNA binding	.
Tc01_g033480	0	C:nucleus; F:DNA binding; P:cellular nitrogen compound metabolic process; P:biosynthetic process	.	Tc01_g020700	1.23e-84	P:small molecule metabolic process; C:peroxisome; P:protein targeting; P:transmembrane transport; P:catabolic process; P:lipid metabolic process	.	Tc04_g024990	5.6e-123	F:metal ion binding	.	Tc03_g016070	7.87e-121	C:cellular_component	.
Tc01_g033500	0	C:nucleus; F:DNA binding; P:cellular nitrogen compound metabolic process; P:biosynthetic process	.	Tc01_g020760	1.1e-36	C:mitochondrion; P:tRNA metabolic process; P:cellular amino acid metabolic process; C:plastid; F:ligase activity; P:translation	.	Tc04_g025070	0	C:nucleus; F:DNA binding; P:biological_process; F:ion binding; F:helicase activity; C:plastid	.	Tc03_g016390	2.09e-140	P:cellular protein modification process; F:kinase activity; P:Cell cycle; F:enzyme binding	.
Tc01_g033590	1.86e-110	F:methyltransferase activity	.	Tc01_g020770	1e-177	P:phosphorylation; F:kinase activity	.	Tc04_g025230	0	F:oxidoreductase activity; F:ion binding	.	Tc03_g016800	0	F:transmembrane transporter activity; F:oxidoreductase activity; C:cellular_component	.
Tc01_g033850	0	P:small molecule metabolic process; F:transferase activity, transferring acyl groups; P:lipid metabolic process; P:biosynthetic process; C:cellular_component	.	Tc01_g020810	0	C:cellular_component; P:transport; F:molecular_function	.	Tc04_g025820	0	F:ATPase activity; P:biological_process; C:cytoskeleton; C:cytoplasm; C:protein complex; F:cytoskeletal protein binding	.	Tc03_g016960	0	C:nucleus; F:DNA binding; F:nucleic acid binding transcription factor activity; P:cellular nitrogen compound metabolic process; P:biosynthetic process	.
Tc01_g033870	2.89e-70	C:cellular_component	.	Tc01_g020850	0	F:ATP binding; F:protein serine/threonine kinase activity; P:protein phosphorylation	.	Tc04_g025840	0	F:kinase activity	.	Tc03_g017040	0	P:embryo development; P:Cell division; P:cellular protein modification process; P:anatomical structure formation involved in morphogenesis; F:kinase activity; C:plasma membrane; P:reproduction	.
Tc01_g034060	0	C:cellular_component; F:molecular_function	.	Tc01_g020930	0	F:molecular_function	.	Tc04_g025961	0	F:kinase activity	.	Tc03_g017170	0	F:molecular_function	.
Tc01_g034120	0	C:integral component of plasma membrane; F:ATP binding; F:cation-transporting ATPase activity; F:metal ion binding; P:metabolic process; P:cation transmembrane transport; C:endoplasmic reticulum	.	Tc01_g020960	0	F:molecular_function	.	Tc04_g025962	2.08e-38	P:biological_process; F:molecular_function	.	Tc03_g017740	0	C:nucleus; P:biosynthetic process; P:DNA metabolic process; P:Cell cycle	.
Tc01_g034320	0	P:secondary metabolic process; P:small molecule metabolic process; F:oxidoreductase activity; P:lipid metabolic process; P:cellular component assembly; F:ion binding; P:extracellular matrix organization; P:anatomical structure formation involved in morphogenesis; P:biosynthetic process; C:cellular_component	.	Tc01_g021100	3.5e-61	C:membrane	.	Tc04_g026050	1.5e-165	C:cytoplasm; F:oxidoreductase activity; P:lipid biosynthetic process; P:oxidation-reduction process; F:S-adenosylmethionine-dependent methyltransferase activity; P:methylation	.	Tc03_g018020	0	P:flavonoid glucuronidation; F:quercetin 3-O-glucosyltransferase activity; C:intracellular membrane-bounded organelle; F:quercetin 7-O-glucosyltransferase activity; F:quercetin 3'-O-glucosyltransferase activity; F:quercetin 4'-O-glucosyltransferase activity; C:cytosol; P:flavonoid biosynthetic process	.
Tc01_g034380	0	P:lipid metabolic process; P:cellular protein modification process; C:cytosol; F:kinase activity; P:Response to stress	.	Tc01_g021170	0	F:hydrolase activity, acting on carbon-nitrogen (but not peptide) bonds; C:cytoplasm; P:cofactor metabolic process; F:ion binding; P:cellular nitrogen compound metabolic process; P:biosynthetic process	.	Tc04_g026180	0	C:cytoplasm; F:oxidoreductase activity; P:lipid metabolic process; F:methyltransferase activity; P:biosynthetic process	.	Tc03_g018040	1.5e-106	C:microtubule associated complex; P:microtubule-based process	.
Tc01_g034410	0	F:GTPase activity	.	Tc01_g021320	0	F:zinc ion binding	.	Tc04_g026620	1.3e-164	F:DNA binding	.	Tc03_g018360	2.05e-164	F:DNA binding	.
Tc01_g034420	0	F:transferase activity, transferring acyl groups; P:lipid metabolic process; P:biosynthetic process; C:cellular_component	.	Tc01_g021510	0	P:carbohydrate metabolic process; F:transferase activity, transferring glycosyl groups; C:cell wall; P:cell wall organization or biogenesis; C:extracellular region; F:hydrolase activity, acting on glycosyl bonds	.	Tc04_g026990	1.29e-97	F:ubiquitin-protein transferase activity; P:SCF-dependent proteasomal ubiquitin-dependent protein catabolic process; C:SCF ubiquitin ligase complex; P:protein ubiquitination	.	Tc03_g018410	0	C:cell wall	.
Tc01_g034560	0	F:transmembrane transporter activity; C:cellular_component	.	Tc01_g021900	0	P:signal transduction	.	Tc04_g027120	8.58e-95	C:nucleus; C:cytoplasm; F:signal transducer activity; F:kinase activity; F:enzyme binding	.	Tc03_g018470	0	P:secondary metabolic process; F:oxidoreductase activity; F:ion binding; P:biosynthetic process; C:cellular_component	.
Tc01_g034600	0	P:lipid metabolic process; F:molecular_function	.	Tc01_g022100	1.79e-106	F:DNA binding; F:nucleotidyltransferase activity; P:locomotion; F:nuclease activity; F:ion binding; F:peptidase activity; P:biosynthetic process; P:DNA metabolic process; P:symbiosis, encompassing mutualism through parasitism; P:transport	.	Tc04_g027320	0	P:Cell division; P:cellular component assembly; P:cellular protein modification process; P:anatomical structure formation involved in morphogenesis; F:cytoskeletal protein binding; C:cellular_component; F:kinase activity; P:Cell cycle	.	Tc03_g018540	0	P:cellular protein modification process; C:cellular_component; F:kinase activity	.
Tc01_g034680	0	F:DNA binding; F:nucleic acid binding transcription factor activity; P:cellular nitrogen compound metabolic process; P:biosynthetic process	.	Tc01_g022110	8e-76	F:molecular_function	.	Tc04_g027330	3.3e-61	C:membrane	.	Tc03_g018800	0	F:phosphatase activity; P:cellular protein modification process; C:cellular_component; F:kinase activity	.
Tc01_g034860	0	P:transmembrane transport; F:structural constituent of ribosome; C:cellular_component; P:translation	.	Tc01_g022160	1.22e-118	F:ion binding; F:ligase activity	.	Tc04_g028240	0	P:meiotic chromosome condensation; P:mitotic chromosome condensation; F:histone binding; C:condensed chromosome, centromeric region; C:nuclear condensin complex; F:chromatin binding; P:chromosome separation	.	Tc03_g019490	1.05e-120	P:anatomical structure development; P:reproduction	.
Tc01_g034880	0	C:nucleus; F:DNA binding; F:nucleic acid binding transcription factor activity; P:cellular nitrogen compound metabolic process; P:biosynthetic process	.	Tc01_g022340	0	C:nucleus; C:cytoplasm	.	Tc04_g028790	8.38e-110	P:Response to stress	.	Tc03_g019520	0	C:nucleus; F:DNA binding; F:lipid binding; P:cellular nitrogen compound metabolic process; P:biosynthetic process	.
Tc01_g034920	0	P:carbohydrate metabolic process; F:carbohydrate binding; F:isomerase activity	.	Tc01_g022760	0	P:biological_process; F:transferase activity, transferring acyl groups	.	Tc04_g029090	0	F:ligase activity	.	Tc03_g019940	0	P:biosynthetic process; F:ligase activity	.
Tc01_g034950	0	C:cellular_component	.	Tc01_g022890	0	P:carbohydrate metabolic process; P:catabolic process; F:lyase activity; F:ion binding	.	Tc04_g029500	0	F:RNA binding; P:mRNA processing; C:vacuole; C:plastid; P:translation	.	Tc03_g019990	0	P:cellular protein modification process; F:kinase activity; C:plasma membrane	.
Tc01_g034990	0	C:nucleus; P:cellular protein modification process; C:protein complex; F:molecular_function	.	Tc01_g022950	0	F:zinc ion binding; F:oxidoreductase activity; P:oxidation-reduction process	.	Tc04_g029870	8.6e-94	P:negative regulation of catalytic activity; F:enzyme inhibitor activity	.	Tc03_g020210	0	F:transmembrane transporter activity; C:cellular_component	.
Tc01_g035050	4.42e-180	P:carbohydrate metabolic process; P:catabolic process; C:cell wall; C:extracellular region; F:hydrolase activity, acting on glycosyl bonds	.	Tc01_g024230	0	F:transmembrane transporter activity; C:plasma membrane	.	Tc04_g030030	0	P:catabolic process; F:peptidase activity; C:vacuole	.	Tc03_g020240	0	P:Cell division; F:ubiquitin-protein transferase activator activity; F:anaphase-promoting complex binding	.
Tc01_g035330	1.46e-172	F:DNA binding; F:nucleic acid binding transcription factor activity; P:cellular nitrogen compound metabolic process; P:biosynthetic process	.	Tc01_g025071	0	P:phosphorylation; F:kinase activity	.	Tc04_g030350	0	C:cellular_component; F:kinase activity	.	Tc03_g020250	0	F:oxidoreductase activity	.
Tc01_g035360	0	P:1-aminocyclopropane-1-carboxylate biosynthetic process; F:pyridoxal phosphate binding; F:1-aminocyclopropane-1-carboxylate synthase activity	.	Tc01_g025400	0	P:DNA metabolic process; F:molecular_function; P:Response to stress	.	Tc04_g030360	0	P:Cell division; F:cytoskeletal protein binding; P:Cell cycle	.	Tc03_g020330	0	P:biological_process; C:cytoskeleton; F:cytoskeletal protein binding	.
Tc01_g035640	3.7e-108	F:ion binding; C:cellular_component; F:ligase activity	.	Tc01_g025460	0	C:cytoskeleton; C:cytoplasm; P:cellular protein modification process; F:kinase activity	.	Tc04_g030490	0	P:embryo development; F:rRNA binding; C:plastid; P:reproduction	.	Tc03_g020510	0	F:GTP binding; F:GTPase activity; C:membrane; P:metabolic process; C:Golgi apparatus; F:structural constituent of cytoskeleton; C:microtubule; P:microtubule-based process	.
Tc01_g035660	9.1e-176	C:membrane; C:integral component of membrane	.	Tc01_g025660	0	P:vesicle-mediated transport; C:cytoplasm; P:protein complex assembly; C:protein complex	.	Tc04_g030660	0	F:RNA binding; P:tRNA metabolic process; F:isomerase activity	.	Tc03_g020630	2.12e-115	F:oxidoreductase activity; C:cellular_component	.
Tc01_g035860	0	F:glycerol-3-phosphate 2-O-acyltransferase activity; P:cutin biosynthetic process; C:integral component of membrane; F:phosphatase activity; F:glycerol-3-phosphate O-acyltransferase activity; P:dephosphorylation	.	Tc01_g025700	0	F:oxidoreductase activity; P:cellular protein modification process; F:signal transducer activity; F:kinase activity; C:intracellular	.	Tc05_g000260	0	F:ion binding; C:plastid; F:ligase activity	.	Tc03_g020960	0	P:pectin catabolic process; P:negative regulation of catalytic activity; C:cell wall; F:aspartyl esterase activity; C:integral component of membrane; F:pectinesterase inhibitor activity; P:cell wall modification; F:pectinesterase activity	.
Tc01_g035920	0	P:cellular protein modification process; F:kinase activity	.	Tc01_g026150	0	P:anatomical structure development; P:cellular protein modification process; C:cellular_component; F:kinase activity	.	Tc05_g001650	1.07e-55	F:transmembrane transporter activity; C:cellular_component	.	Tc03_g021040	0	F:ligase activity	.
Tc01_g036240	0	F:transferase activity, transferring glycosyl groups; F:ion binding; F:lipid binding; C:plasma membrane	.	Tc01_g026600	9.84e-39	P:cellular protein modification process; F:kinase activity	.	Tc05_g001680	0	P:DNA metabolic process; P:Response to stress	.	Tc03_g021200	0	P:carbohydrate metabolic process; C:plasma membrane; F:hydrolase activity, acting on glycosyl bonds	.
Tc01_g036370	2e-130	F:ion binding	.	Tc01_g026710	0	P:cellular protein modification process; C:protein complex; C:intracellular; F:molecular_function	.	Tc05_g001790	0	C:nucleus; P:protein targeting; P:transmembrane transport; F:protein transporter activity; F:methyltransferase activity; C:plastid	.	Tc03_g021400	2.17e-140	F:molecular_function	.
Tc01_g036510	0	F:oxidoreductase activity; P:oxidation-reduction process	.	Tc01_g026970	0	P:lipid metabolic process; F:molecular_function	.	Tc05_g002170	0	P:cofactor metabolic process; P:cellular nitrogen compound metabolic process; P:biosynthetic process; C:cellular_component; F:transferase activity, transferring alkyl or aryl (other than methyl) groups	.	Tc03_g021510	0	P:small molecule metabolic process; C:nucleus; F:DNA binding; F:oxidoreductase activity; P:cofactor metabolic process; F:nucleic acid binding transcription factor activity; P:cellular nitrogen compound metabolic process; P:biosynthetic process; C:plastid	.
Tc01_g036520	0	F:oxidoreductase activity	.	Tc01_g027112	4.21e-41	F:nucleic acid binding; P:DNA integration	.	Tc05_g002600	0	P:generation of precursor metabolites and energy; F:ion binding; P:cellular protein modification process; P:photosynthesis; C:protein complex; C:plastid; C:thylakoid	.	Tc03_g021790	1.12e-144	C:cellular_component	.
Tc01_g036570	0	F:transferase activity, transferring glycosyl groups; P:lipid metabolic process; P:biosynthetic process; C:plastid	.	Tc01_g027261	0	F:ion binding	.	Tc05_g002810	0	C:integral component of membrane; P:transport; F:transporter activity	.	Tc03_g021880	0	F:oxidoreductase activity; P:catabolic process; C:cell wall; F:ion binding; P:cell wall organization or biogenesis; C:extracellular region; P:Response to stress	.
Tc01_g036660	0	F:ion binding; C:vacuole	.	Tc01_g027300	0	F:iron ion binding; F:aromatase activity; C:integral component of membrane; P:oxidation-reduction process; F:heme binding	.	Tc05_g003180	0	C:nucleus; P:cellular nitrogen compound metabolic process; P:biosynthetic process; F:kinase activity; C:plastid	.	Tc03_g022030	0	P:cellular protein modification process; C:cellular_component; F:kinase activity	.
Tc01_g036670	0	F:ion binding	.	Tc01_g027310	0	C:cellular_component	.	Tc05_g003210	0	F:GTP binding; C:cytoplasm; F:GTPase activity; P:metabolic process; F:structural constituent of cytoskeleton; C:microtubule; P:microtubule-based process	.	Tc03_g022190	0	C:cellular_component	.
Tc01_g036680	0	P:cellular protein modification process; F:kinase activity	.	Tc01_g027721	3.4e-67	P:cellular process	.	Tc05_g003570	0	P:biological_process; C:cytosol; C:plasma membrane; F:molecular_function	.	Tc03_g022210	2.7e-108	C:cellular_component	.
Tc01_g036940	0	C:Golgi apparatus; C:plasma membrane	.	Tc01_g028020	0	F:ion binding	.	Tc05_g003630	9.78e-158	P:embryo development; F:transmembrane transporter activity; C:cellular_component; P:reproduction	.	Tc03_g022270	0	C:endosome; C:Golgi apparatus; F:methyltransferase activity; C:vacuole	.
Tc01_g037000	0	F:molecular_function	.	Tc01_g028030	8.85e-79	F:lipid binding; C:cellular_component; P:transport	.	Tc05_g003840	0	C:cytoplasm; F:oxidoreductase activity; P:cellular amino acid metabolic process; P:biosynthetic process; F:kinase activity	.	Tc03_g022330	1.13e-61	F:transmembrane transporter activity; C:plasma membrane	.
Tc01_g037040	0	F:oxidoreductase activity; F:peptidase activity; C:extracellular region	.	Tc01_g028220	0	P:cellular protein modification process; F:kinase activity	.	Tc05_g004280	1.34e-87	F:unfolded protein binding; C:plastid; C:thylakoid	.	Tc03_g022340	0	F:transmembrane transporter activity; C:plasma membrane	.
Tc01_g037370	8.8e-179	C:integral component of membrane	.	Tc01_g028250	0	C:integral component of plasma membrane; F:secondary active sulfate transmembrane transporter activity; C:chloroplast; P:sulfate transmembrane transport	.	Tc05_g004440	0	F:DNA binding	.	Tc03_g022360	0	P:transmembrane transport; F:transmembrane transporter activity; C:integral component of membrane; C:plasma membrane	.
Tc01_g037610	0	P:small molecule metabolic process; F:oxidoreductase activity; P:lipid metabolic process; F:ion binding; P:biosynthetic process; C:cellular_component	.	Tc01_g028290	3.42e-141	C:cellular_component	.	Tc05_g004480	0	C:cell wall; P:cell wall organization or biogenesis; C:extracellular region	.	Tc03_g022540	5.53e-125	F:structural constituent of ribosome; C:mitochondrion; P:ribonucleoprotein complex assembly; C:cytosol; P:ribosome biogenesis; C:ribosome; F:rRNA binding; C:plastid; P:translation	.
Tc01_g037620	0	P:small molecule metabolic process; F:oxidoreductase activity; P:lipid metabolic process; F:ion binding; P:biosynthetic process; C:cellular_component	.	Tc01_g028510	0	F:ATPase activity; F:transmembrane transporter activity; F:ion binding; C:organelle; C:plasma membrane; C:intracellular	.	Tc05_g004570	0	F:ATPase activity; P:biological_process; C:cytoskeleton; C:protein complex; F:cytoskeletal protein binding; C:plastid	.	Tc03_g022640	0	P:carbohydrate metabolic process; F:transferase activity, transferring glycosyl groups; P:biosynthetic process; C:plastid	.
Tc01_g037640	0	P:vesicle-mediated transport	.	Tc01_g028530	3.11e-141	F:ion binding	.	Tc05_g004730	2.22e-173	C:nucleus; F:DNA binding; P:cellular nitrogen compound metabolic process; P:biosynthetic process	.	Tc03_g022650	0	P:carbohydrate metabolic process; C:plasma membrane; F:hydrolase activity, acting on glycosyl bonds	.
Tc01_g037670	0	F:oxidoreductase activity; P:lipid metabolic process; P:biosynthetic process	.	Tc01_g028770	5.7e-144	F:NADP binding; F:glutamyl-tRNA reductase activity; P:tetrapyrrole biosynthetic process; P:oxidation-reduction process	.	Tc05_g005140	0	F:ATPase activity; P:biological_process; C:cytoskeleton; C:protein complex; F:cytoskeletal protein binding	.	Tc03_g022730	0	C:cell; F:protein disulfide oxidoreductase activity; F:electron carrier activity; P:cell redox homeostasis; P:oxidation-reduction process	.
Tc01_g037800	0	P:carbohydrate metabolic process; C:cellular_component; F:isomerase activity	.	Tc01_g028790	0	C:nucleus; P:signal transduction; P:anatomical structure development; P:Response to stress; P:reproduction	.	Tc05_g005250	1.91e-55	F:lyase activity	.	Tc03_g022850	0	F:oxidoreductase activity	.
Tc01_g037810	0	P:cellular amino acid metabolic process; P:biosynthetic process; F:transferase activity, transferring alkyl or aryl (other than methyl) groups	.	Tc01_g028830	0	P:secondary metabolic process; C:protein complex; F:kinase activity; C:nucleoplasm	.	Tc05_g005270	0	F:translation factor activity, RNA binding	.	Tc03_g023070	0	P:catabolic process; P:cellular protein modification process; F:peptidase activity	.
Tc01_g037820	0	P:biological_process; F:molecular_function	.	Tc01_g029150	0	P:cellular protein modification process; F:kinase activity; C:plasma membrane	.	Tc05_g005740	2.49e-180	F:oxidoreductase activity; C:plastid	.	Tc03_g023390	0	C:nucleus; F:DNA binding; P:cellular nitrogen compound metabolic process; P:biosynthetic process	.
Tc01_g037870	2.5e-133	P:negative regulation of catalytic activity; F:enzyme inhibitor activity; P:double fertilization forming a zygote and endosperm	.	Tc01_g029380	0	F:RNA binding	.	Tc05_g006110	0	P:cellular protein modification process; C:cellular_component; F:kinase activity	.	Tc03_g023610	0	P:small molecule metabolic process; P:carbohydrate metabolic process; P:catabolic process; P:lipid metabolic process; F:phosphatase activity; P:anatomical structure development	.
Tc01_g037910	0	P:carbohydrate metabolic process; P:catabolic process; C:cell wall; P:cell wall organization or biogenesis; F:enzyme regulator activity	.	Tc01_g029390	0	P:transmembrane transport; F:structural constituent of ribosome; C:cellular_component; P:translation	.	Tc05_g006380	0	C:cellular_component; P:transport; F:molecular_function	.	Tc03_g024130	0	P:signal transduction; C:cellular_component; P:Response to stress	.
Tc01_g037920	0	P:carbohydrate metabolic process; P:catabolic process; C:cell wall; P:cell wall organization or biogenesis; C:extracellular region; F:enzyme regulator activity	.	Tc01_g029930	0	F:DNA binding	.	Tc05_g007070	0	F:ATPase activity; F:transmembrane transporter activity; P:signal transduction; P:pigmentation; P:anatomical structure development; C:plasma membrane; P:reproduction	.	Tc03_g024360	0	P:cellular protein modification process; C:cellular_component; F:kinase activity	.
Tc01_g037930	7.6e-168	P:pectin catabolic process; P:negative regulation of catalytic activity; C:cell wall; F:aspartyl esterase activity; C:extracellular region; F:pectinesterase inhibitor activity; P:cell wall modification; F:pectinesterase activity	.	Tc01_g029970	0	F:potassium ion transmembrane transporter activity; P:potassium ion transmembrane transport; C:integral component of membrane	.	Tc05_g007170	0	P:cell wall macromolecule catabolic process; C:cell wall; C:apoplast; P:cell wall organization; F:hydrolase activity, hydrolyzing O-glycosyl compounds; F:xyloglucan:xyloglucosyl transferase activity; P:xyloglucan metabolic process; P:cell wall biogenesis	.	Tc03_g024380	5.44e-109	F:structural constituent of ribosome; C:mitochondrion; C:ribosome; P:translation	.
Tc01_g037990	0	C:peroxisome; C:cytoskeleton	.	Tc01_g029990	0	F:transmembrane transporter activity; C:cellular_component	.	Tc05_g007240	0	P:cellular protein modification process; F:kinase activity; C:plasma membrane; P:reproduction	.	Tc03_g024610	7.57e-176	P:Cell proliferation; C:nucleus; F:DNA binding; P:cell morphogenesis; F:nucleic acid binding transcription factor activity; P:cellular nitrogen compound metabolic process; P:biosynthetic process; P:growth	.
Tc01_g038040	0	F:oxidoreductase activity	.	Tc01_g030140	7.81e-94	C:cytoplasm; P:homeostatic process; F:ion binding; P:transport	.	Tc05_g007730	7.73e-168	P:cellular protein modification process; C:endoplasmic reticulum; P:protein folding; C:plastid; C:thylakoid; F:isomerase activity	.	Tc03_g024710	1.5e-158	C:nucleus; F:DNA binding; F:transcription factor activity, sequence-specific DNA binding; P:transcription, DNA-templated; P:regulation of transcription, DNA-templated	.
Tc01_g038050	6.8e-38	P:biological_process; F:molecular_function	.	Tc01_g030191	0	F:nucleotidyltransferase activity; F:nuclease activity; P:biosynthetic process; P:DNA metabolic process; C:cellular_component	.	Tc05_g008010	0	F:ATP binding; C:integral component of membrane; F:protein kinase activity; P:protein phosphorylation; C:plasma membrane	.	Tc03_g024840	0	C:nucleus; P:signal transduction; F:lipid binding	.
Tc01_g038180	8.7e-176	C:endoplasmic reticulum; P:cellular response to phosphate starvation	.	Tc01_g030280	6.6e-97	P:porphyrin-containing compound metabolic process; C:integral component of membrane; C:endoplasmic reticulum; C:Golgi stack; F:heme binding	.	Tc05_g008170	0	F:DNA binding	.	Tc03_g025000	0	F:ion binding	.
Tc01_g038460	1.46e-72	C:cellular_component	.	Tc01_g030310	1.64e-153	F:translation factor activity, RNA binding; C:cellular_component	.	Tc05_g008870	0	C:nucleus; F:DNA binding; F:nucleic acid binding transcription factor activity; P:anatomical structure development; P:cellular nitrogen compound metabolic process; P:biosynthetic process; P:reproduction	.	Tc03_g025020	0	P:carbohydrate metabolic process; P:catabolic process; C:cell wall; F:lyase activity; P:cell wall organization or biogenesis	.
Tc01_g038470	0	F:zinc ion binding; P:proteolysis; C:integral component of membrane; C:extracellular matrix; F:metalloendopeptidase activity	.	Tc01_g030430	0	P:small molecule metabolic process; C:nucleus; P:cell death; P:catabolic process; F:ion binding; P:cellular protein modification process; P:biosynthetic process; C:plasma membrane; P:Response to stress; P:immune system process; F:ligase activity	.	Tc05_g009200	0	C:cell; F:oxidoreductase activity; P:homeostatic process	.	Tc03_g025300	1.68e-47	F:lipid binding; P:transport	.
Tc01_g038880	8.11e-13	C:cellular_component	.	Tc01_g030580	0	C:cellular_component	.	Tc05_g009260	0	P:protein targeting; P:membrane organization; F:RNA binding; F:GTPase activity; C:plastid	.	Tc03_g025320	0	F:transmembrane transporter activity; C:plasma membrane; P:Response to stress	.
Tc01_g039000	7.25e-27	C:membrane; C:integral component of membrane	.	Tc01_g030680	0	C:nucleus; F:transferase activity, transferring glycosyl groups; C:cytoplasm; P:cellular protein modification process; P:biosynthetic process; P:DNA metabolic process; F:ligase activity; P:Response to stress	.	Tc05_g009380	0	F:ATPase activity; P:biological_process; C:cytoskeleton; C:protein complex; F:cytoskeletal protein binding	.	Tc03_g025500	0	F:oxidoreductase activity; C:cell wall; F:ion binding; C:plasma membrane	.
Tc01_g039220	3.2e-157	C:nucleus; F:DNA binding; F:nucleic acid binding transcription factor activity; P:cellular nitrogen compound metabolic process; P:biosynthetic process	.	Tc01_g030720	2.1e-48	P:Response to stress	.	Tc05_g010080	3.75e-29	C:cellular_component; P:transport	.	Tc03_g025520	0	C:plastid; C:thylakoid	.
Tc01_g039230	1.7e-140	C:nucleus; F:DNA binding; F:transcription factor activity, sequence-specific DNA binding; P:transcription, DNA-templated; P:regulation of transcription, DNA-templated	.	Tc01_g030770	0	P:vesicle-mediated transport; C:cytoplasm; C:protein complex	.	Tc05_g011120	6.37e-175	C:plastid; F:molecular_function; C:thylakoid	.	Tc03_g025550	0	P:catabolic process; P:protein maturation; F:peptidase activity; C:vacuole	.
Tc01_g039410	0	F:ATP binding; C:integral component of membrane; F:protein serine/threonine kinase activity; P:protein phosphorylation; F:polysaccharide binding	.	Tc01_g030830	5.8e-118	P:Cell proliferation; F:zinc ion binding; F:5S rRNA binding; C:cytosolic large ribosomal subunit; C:nucleolus; C:vacuole; P:response to cytokinin; P:adaxial/abaxial pattern specification; C:plasma membrane; P:leaf morphogenesis; C:chloroplast; C:integral component of membrane; P:root morphogenesis;	.	Tc05_g011460	1.02e-133	C:nucleus; F:lyase activity; C:cytosol; P:biosynthetic process; F:hydrolase activity, acting on glycosyl bonds	.	Tc03_g025590	9.24e-148	F:enzyme regulator activity	.
Tc01_g039480	0	P:cellular protein modification process; C:cellular_component; F:kinase activity	.	Tc01_g030860	0	P:carbohydrate metabolic process; P:catabolic process; C:cell wall; P:cell wall organization or biogenesis; F:enzyme regulator activity	.	Tc05_g012720	0	F:phosphatase activity; C:cytosol	.	Tc03_g025600	3.73e-115	F:enzyme regulator activity	.
Tc01_g039540	1.06e-114	P:cellular protein modification process; F:kinase activity; P:Cell cycle; F:enzyme binding	.	Tc01_g031030	2.4e-152	C:nucleus; F:DNA binding; F:transcription factor activity, sequence-specific DNA binding; P:transcription, DNA-templated; P:regulation of transcription, DNA-templated	.	Tc05_g012820	0	F:ATPase activity; F:transmembrane transporter activity; C:plasma membrane	.	Tc03_g025660	9.43e-149	F:enzyme regulator activity	.
Tc01_g039560	7.5e-100	C:integral component of membrane	.	Tc01_g031090	0	P:small molecule metabolic process; P:generation of precursor metabolites and energy; P:protein complex assembly; C:mitochondrion; F:lyase activity; C:cytosol; C:protein complex	.	Tc05_g012850	6.66e-137	C:cellular_component	.	Tc03_g025710	4.28e-173	F:DNA binding	.
Tc01_g039570	0	C:cellular_component	.	Tc01_g031100	2.66e-114	C:nucleus; C:cytoplasm; P:signal transduction; F:ion binding; P:cellular protein modification process; F:enzyme regulator activity; P:Response to stress	.	Tc05_g012930	2.09e-64	P:catabolic process; F:ion binding; P:cellular protein modification process; C:cellular_component	.	Tc03_g025830	0	F:oxidoreductase activity; F:ion binding; C:cellular_component	.
Tc01_g039591	0	F:molecular_function	.	Tc01_g031190	0	P:cell morphogenesis; P:cellular component assembly; P:extracellular matrix organization; P:Cell differentiation; P:cell wall organization or biogenesis; P:developmental maturation; C:cellular_component; P:growth	.	Tc05_g013900	0	C:nucleus	.	Tc03_g026000	0	P:small molecule metabolic process; F:oxidoreductase activity; P:lipid metabolic process; F:ion binding; P:biosynthetic process; C:cellular_component	.
Tc01_g039600	1.38e-128	C:cellular_component	.	Tc01_g031480	0	F:unfolded protein binding; P:protein folding	.	Tc05_g014000	1.47e-168	F:ion binding; P:photosynthesis; C:protein complex; C:thylakoid	.	Tc03_g026100	0	F:transmembrane transporter activity; C:plasma membrane	.
Tc01_g039611	0	F:zinc ion binding	.	Tc01_g031490	0	P:lipid metabolic process; C:integral component of membrane; F:hydrolase activity	.	Tc05_g014180	0	F:oxidoreductase activity	.	Tc03_g026110	8.5e-64	F:calcium ion binding	.
Tc01_g039650	7.44e-53	C:cellular_component	.	Tc01_g031670	1.16e-89	F:DNA binding; F:nucleic acid binding transcription factor activity; P:anatomical structure development; P:developmental maturation; P:cellular nitrogen compound metabolic process; P:biosynthetic process; P:reproduction	.	Tc05_g015550	0	C:cell; F:oxidoreductase activity; P:homeostatic process	.	Tc03_g026220	0	C:cytoskeleton; P:cellular protein modification process; F:molecular_function; P:Cell cycle	.
Tc01_g039660	2.59e-146	F:molecular_function	.	Tc01_g032010	1.27e-130	C:cellular_component	.	Tc05_g016360	0	P:cellular protein modification process; F:kinase activity; C:plasma membrane	.	Tc03_g026390	0	F:oxidoreductase activity	.
Tc01_g039670	2.68e-109	C:cellular_component	.	Tc01_g032020	6.4e-139	P:negative regulation of catalytic activity; F:enzyme inhibitor activity	.	Tc05_g016530	0	F:molecular_function; P:Response to stress	.	Tc03_g026410	0	F:oxidoreductase activity	.
Tc01_g039690	8.4e-107	C:integral component of membrane	.	Tc01_g032040	0	F:glycerol-3-phosphate 2-O-acyltransferase activity; P:cutin biosynthetic process; C:integral component of membrane; F:phosphatase activity; P:dephosphorylation	.	Tc05_g016720	0	P:cofactor metabolic process; P:cellular nitrogen compound metabolic process; P:biosynthetic process; F:ligase activity	.	Tc03_g027090	2.57e-179	C:cellular_component	.
Tc01_g039700	1.1e-98	C:integral component of membrane	.	Tc01_g032140	0	F:nucleotidyltransferase activity; F:nuclease activity; P:biosynthetic process; P:DNA metabolic process; C:cellular_component	.	Tc05_g016790	0	F:methyltransferase activity; C:ribosome	.	Tc03_g027100	0	F:RNA binding; C:nucleolus; C:plastid	.
Tc01_g039710	0	C:integral component of membrane	.	Tc01_g032310	0	F:iron ion binding; F:gibberellin 3-beta-dioxygenase activity; P:gibberellin catabolic process; P:oxidation-reduction process; P:response to light stimulus; F:C-19 gibberellin 2-beta-dioxygenase activity	.	Tc05_g017210	0	P:biological_process; C:cytoskeleton; F:cytoskeletal protein binding	.	Tc03_g027220	0	P:cellular protein modification process; C:cellular_component; F:kinase activity	.
Tc01_g039720	0	C:cellular_component	.	Tc01_g032340	0	C:nucleus; F:DNA binding; P:cellular nitrogen compound metabolic process; P:biosynthetic process; P:Response to stress	.	Tc05_g017390	0	C:cellular_component; P:transport	.	Tc03_g027250	0	P:biological_process; C:cytoskeleton; F:GTPase activity; F:structural molecule activity; C:Golgi apparatus	.
Tc01_g039760	0	C:cellular_component; F:molecular_function	.	Tc01_g032360	0	P:response to cold; F:inositol 3-alpha-galactosyltransferase activity; P:galactose metabolic process	.	Tc05_g017440	0	P:DNA-templated transcription, termination	.	Tc03_g027380	0	P:biological_process; C:cytoskeleton; C:cytoplasm; F:GTPase activity; F:structural molecule activity	.
Tc01_g039770	0	P:metabolic process; C:integral component of membrane; F:transferase activity	.	Tc01_g032390	4.6e-119	P:signal transduction; C:cytosol; C:Golgi apparatus; C:vacuole; F:enzyme regulator activity; C:plastid	.	Tc05_g018060	0	C:nuclear envelope; P:nucleocytoplasmic transport; P:protein targeting; P:protein complex assembly; F:structural molecule activity; C:protein complex	.	Tc03_g027540	0	P:Cell division; C:cytoplasm; P:cell morphogenesis; P:biosynthetic process; F:ligase activity	.
Tc01_g039870	0	P:cellular protein modification process; F:kinase activity	.	Tc01_g032460	8.04e-43	P:Response to stress; P:immune system process	.	Tc05_g018150	0	F:oxidoreductase activity; P:cellular protein modification process; C:cellular_component; F:kinase activity	.	Tc03_g027570	0	F:transmembrane transporter activity; P:homeostatic process; C:vacuole; C:plasma membrane	.
Tc01_g040280	0	P:carbohydrate metabolic process; P:cellular nitrogen compound metabolic process; P:biosynthetic process; F:molecular_function	.	Tc01_g032490	0	P:cellular protein modification process; F:kinase activity	.	Tc05_g018190	2.6e-147	C:integral component of membrane	.	Tc03_g027600	0	C:cellular_component	.
Tc01_g040370	0	F:oxidoreductase activity; P:catabolic process; P:cellular nitrogen compound metabolic process	.	Tc01_g032500	0	F:phosphatase activity; F:ion binding; P:cellular protein modification process	.	Tc05_g018300	0	F:transferase activity, transferring glycosyl groups; F:ion binding; F:lipid binding; C:plasma membrane	.	Tc03_g027770	4.2e-109	F:zinc ion binding; C:integral component of membrane	.
Tc01_g040390	1.7e-54	P:biological_process; F:molecular_function	.	Tc01_g032570	0	F:oxidoreductase activity; P:catabolic process; F:ion binding; C:extracellular region; P:Response to stress	.	Tc05_g018350	0	F:iron ion binding; P:secondary metabolite biosynthetic process; C:integral component of membrane; F:oxidoreductase activity, acting on paired donors, with incorporation or reduction of molecular oxygen, NAD(P)H as one donor, and incorporation of one atom of oxygen; P:oxidation-reduction process; F:heme binding	.	Tc03_g027840	0	F:transferase activity, transferring glycosyl groups; C:cellular_component	.
Tc01_g040510	0	C:cell; F:transmembrane transporter activity; P:homeostatic process	.	Tc01_g032600	0	F:ion binding	.	Tc05_g018380	0	F:peptidase activity	.	Tc03_g028000	3.58e-63	C:nucleus; P:signal transduction; P:catabolic process	.
Tc01_g040600	0	P:pectin catabolic process; P:pollen sperm Cell differentiation; F:lyase activity; F:polygalacturonase activity; P:cell wall organization; C:extracellular region; P:anther dehiscence; P:fruit dehiscence	.	Tc01_g032620	0	F:ion binding	.	Tc05_g018430	0	F:ion binding	.	Tc03_g028090	6.07e-157	C:cellular_component; P:Response to stress	.
Tc01_g040670	0	F:transmembrane transporter activity; C:plasma membrane	.	Tc01_g032650	9.8e-103	C:chloroplast; C:integral component of membrane; P:photosynthesis, light harvesting; P:protein-chromophore linkage; F:chlorophyll binding; C:thylakoid	.	Tc05_g019220	7.39e-163	F:transferase activity, transferring glycosyl groups	.	Tc03_g028180	6.64e-171	F:kinase activity	.
Tc01_g040740	0	P:transmembrane transport; C:mitochondrion; F:molecular_function	.	Tc01_g032660	0	P:small molecule metabolic process; P:sulfur compound metabolic process; C:cytoplasm; P:cofactor metabolic process; F:ion binding; P:biosynthetic process; F:transferase activity, transferring alkyl or aryl (other than methyl) groups	.	Tc05_g019370	1.82e-121	P:small molecule metabolic process; P:sulfur compound metabolic process; F:oxidoreductase activity; P:homeostatic process; P:protein folding; C:plastid; P:Response to stress	.	Tc03_g028260	0	C:cellular_component	.
Tc01_g040850	2.74e-83	F:DNA binding; F:ion binding	.	Tc01_g032670	1.3e-77	P:metabolic process; C:integral component of membrane; F:hydrolase activity, hydrolyzing O-glycosyl compounds; C:anchored component of plasma membrane; F:polysaccharide binding	.	Tc05_g019680	0	P:carbohydrate metabolic process; P:catabolic process; F:hydrolase activity, acting on glycosyl bonds	.	Tc03_g028620	0	F:transmembrane transporter activity; C:plasma membrane	.
Tc01_g040900	0	F:transferase activity, transferring glycosyl groups; P:metabolic process; C:integral component of membrane	.	Tc01_g032700	0	F:ATPase activity; F:ATP binding; P:metabolic process; C:integral component of membrane; P:transport	.	Tc05_g019750	0	F:DNA binding; F:RNA binding; F:nuclease activity; P:DNA metabolic process; P:symbiosis, encompassing mutualism through parasitism; P:Response to stress; P:immune system process	.	Tc03_g028820	0	P:carbohydrate metabolic process; F:lyase activity; P:cell wall organization or biogenesis; C:extracellular region; F:hydrolase activity, acting on glycosyl bonds	.
Tc01_g041050	0	F:transferase activity, transferring glycosyl groups; C:cytoplasm	.	Tc01_g032710	0	F:ATPase activity; F:ATP binding; P:metabolic process; C:integral component of membrane; P:transport	.	Tc05_g019800	0	F:molecular_function	.	Tc03_g029000	3.16e-155	P:generation of precursor metabolites and energy; P:photosynthesis; C:protein complex; C:plastid; C:thylakoid	.
Tc02_g000010	0	P:cellular amino acid metabolic process; P:cellular nitrogen compound metabolic process; P:biosynthetic process; F:ligase activity	.	Tc01_g032810	0	F:transmembrane transporter activity; F:ion binding; C:vacuole	.	Tc05_g021100	0	C:nucleus; F:nuclease activity; P:DNA metabolic process	.	Tc03_g029140	0	F:hydrolase activity, acting on ester bonds; F:9,9'-dicis-carotene:quinone oxidoreductase activity; P:oxidation-reduction process; P:9,9'-di-cis-zeta-carotene desaturation to 7,9,7',9'-tetra-cis-lycopene; F:7,9,9'-tricis-neurosporene:quinone oxidoreductase activity	.
Tc02_g000120	0	F:zinc ion binding	.	Tc01_g032830	0	F:ATP binding; F:ATPase activity, coupled to transmembrane movement of substances; P:transmembrane transport; P:metabolic process; C:integral component of membrane	.	Tc05_g021210	0	F:transferase activity, transferring acyl groups	.	Tc03_g029150	5.54e-140	F:ion binding; P:Response to stress	.
Tc02_g000460	3.47e-120	C:nucleus; F:RNA binding	.	Tc01_g032840	0	F:ATPase activity; F:transmembrane transporter activity; C:cellular_component	.	Tc05_g021400	0	F:DNA binding; F:transcription factor activity, protein binding; F:nucleic acid binding transcription factor activity; P:photosynthesis; P:cellular nitrogen compound metabolic process; P:biosynthetic process; C:plastid	.	Tc03_g029210	2.32e-117	F:ligase activity	.
Tc02_g000490	0	F:ATPase activity; C:endosome; F:transmembrane transporter activity; F:ion binding; C:Golgi apparatus; C:plasma membrane	.	Tc01_g032950	0	P:carbohydrate metabolic process; P:catabolic process; P:cell wall organization or biogenesis; C:cellular_component; F:hydrolase activity, acting on glycosyl bonds	.	Tc05_g021440	0	C:cellular_component	.	Tc03_g029250	0	C:cytoskeleton; P:cytoskeleton organization; F:oxidoreductase activity; P:homeostatic process; P:cellular component assembly	.
Tc02_g000640	3.87e-95	P:carbohydrate metabolic process; F:hydrolase activity, hydrolyzing O-glycosyl compounds	.	Tc01_g032980	2.49e-114	C:nucleus; P:signal transduction; P:cellular nitrogen compound metabolic process; P:biosynthetic process	.	Tc05_g021820	0	F:molecular_function; P:Response to stress	.	Tc03_g029710	0	P:carbohydrate metabolic process; P:biosynthetic process; F:molecular_function	.
Tc02_g000860	0	F:ion binding	.	Tc01_g033190	0	C:cell wall; C:integral component of membrane; P:plant-type cell wall organization; C:extracellular region	.	Tc05_g021830	0	F:molecular_function; P:Response to stress	.	Tc03_g029930	0	P:small molecule metabolic process; F:ion binding; P:biosynthetic process; F:kinase activity	.
Tc02_g001040	0	C:endosome; F:transmembrane transporter activity; C:Golgi apparatus; C:plasma membrane	.	Tc01_g033390	0	C:cellular_component; F:molecular_function	.	Tc05_g021850	0	F:molecular_function; P:Response to stress	.	Tc03_g030000	0	C:plasma membrane; F:molecular_function	.
Tc02_g001260	1.28e-78	P:biological_process; C:mitochondrion; F:ion binding	.	Tc01_g033400	5.76e-82	C:cellular_component	.	Tc05_g021910	2.2e-86	C:cellular_component	.	Tc03_g030170	0	C:cellular_component	.
Tc02_g001480	0	P:small molecule metabolic process; F:oxidoreductase activity; P:lipid metabolic process; F:ion binding; P:biosynthetic process; C:cellular_component	.	Tc01_g033570	0	F:iron ion binding; F:naringenin 3-dioxygenase activity; P:oxidation-reduction process	.	Tc05_g022220	0	P:small molecule metabolic process; P:cellular nitrogen compound metabolic process; F:molecular_function	.	Tc03_g030330	0	F:oxidoreductase activity; F:ion binding; C:cellular_component	.
Tc02_g001700	2.57e-132	C:cellular_component	.	Tc01_g033590	1.6e-110	F:O-methyltransferase activity; F:protein dimerization activity; F:S-adenosylmethionine-dependent methyltransferase activity; P:methylation	.	Tc05_g022291	0	F:DNA binding	.	Tc03_g030360	7.54e-161	C:nucleus	.
Tc02_g001780	8.2e-150	C:integral component of membrane; P:phosphorylation; F:kinase activity	.	Tc01_g033850	0	F:transferase activity, transferring acyl groups other than amino-acyl groups; C:integral component of membrane; P:fatty acid biosynthetic process	.	Tc05_g022660	0	P:transmembrane transport; C:cellular_component	.	Tc03_g030370	0	F:transmembrane transporter activity; P:biosynthetic process; C:plastid	.
Tc02_g001790	7.5e-83	C:integral component of membrane; P:phosphorylation; F:kinase activity	.	Tc01_g033900	0	F:methyltransferase activity; C:cellular_component	.	Tc05_g022770	2.8e-113	F:serine-type endopeptidase inhibitor activity; P:proteolysis; P:response to wounding; P:negative regulation of endopeptidase activity; F:peptidase activity	.	Tc03_g030390	0	C:Golgi apparatus; C:plasma membrane	.
Tc02_g001820	0	C:nucleus; F:DNA binding; P:cellular nitrogen compound metabolic process; P:biosynthetic process	.	Tc01_g034060	0	C:cellular_component; F:molecular_function	.	Tc05_g022780	5.44e-97	F:enzyme regulator activity; C:plastid; P:Response to stress; C:thylakoid	.	Tc03_g030590	1.5e-117	P:negative regulation of catalytic activity; F:enzyme inhibitor activity	.
Tc02_g001840	0	C:nucleus; F:DNA binding; P:cellular nitrogen compound metabolic process; P:biosynthetic process	.	Tc01_g034120	0	F:ATPase activity; F:transmembrane transporter activity; F:ion binding; C:endoplasmic reticulum; C:plasma membrane	.	Tc05_g023100	0	C:plasma membrane; F:molecular_function; P:Response to stress	.	Tc03_g030600	1.99e-123	C:plastid	.
Tc02_g001870	0	C:integral component of membrane; P:phosphorylation; F:kinase activity	.	Tc01_g034320	0	P:secondary metabolic process; P:small molecule metabolic process; F:oxidoreductase activity; P:lipid metabolic process; P:cellular component assembly; F:ion binding; P:extracellular matrix organization; P:anatomical structure formation involved in morphogenesis; P:biosynthetic process; C:cellular_component	.	Tc05_g023190	0	P:drug transmembrane transport; F:antiporter activity; C:integral component of membrane; F:drug transmembrane transporter activity	.	Tc03_g030700	0	F:DNA binding; P:chromosome organization; F:helicase activity; P:biosynthetic process; P:DNA metabolic process; P:Response to stress	.
Tc02_g001910	8.4e-166	P:sulfur compound metabolic process; P:cofactor metabolic process; P:cellular component assembly; F:ion binding; P:biosynthetic process; C:plasma membrane; C:plastid; P:Response to stress	.	Tc01_g034380	0	P:response to salt stress; C:cytosol; P:protein autophosphorylation; P:phosphatidylinositol phosphorylation; F:1-phosphatidylinositol 4-kinase activity; F:protein serine/threonine kinase activity	.	Tc05_g023260	0	F:ubiquitin-protein transferase activity; P:SCF-dependent proteasomal ubiquitin-dependent protein catabolic process; C:SCF ubiquitin ligase complex; P:protein ubiquitination	.	Tc03_g031230	0	P:cellular protein modification process; F:methyltransferase activity	.
Tc02_g001930	0	C:nucleus; F:DNA binding; P:transcription, DNA-templated; P:regulation of transcription, DNA-templated	.	Tc01_g034410	0	P:embryo development ending in seed dormancy; P:xylem and phloem pattern formation; P:metabolic process; P:trichome branching; C:vacuolar membrane; F:protein histidine kinase binding; C:cell plate; C:plasma membrane; C:microtubule; C:chloroplast thylakoid membrane; P:cell plate formation involved in plant-type cell wall biogenesis; F:GTP binding; P:clathrin-mediated endocytosis; C:plasmodesma	.	Tc05_g023350	0	F:ATP binding; F:ATPase activity, coupled to transmembrane movement of substances; P:transmembrane transport; P:metabolic process; C:integral component of membrane	.	Tc04_g000080	1.89e-147	P:cellular protein modification process; F:kinase activity	.
Tc02_g001950	0	C:nucleus; F:DNA binding; P:transcription, DNA-templated; P:regulation of transcription, DNA-templated	.	Tc01_g034560	0	C:integral component of plasma membrane; F:voltage-gated potassium channel activity; P:regulation of membrane potential; P:potassium ion transmembrane transport	.	Tc05_g023760	0	C:cytoplasm; F:oxidoreductase activity; P:lipid metabolic process	.	Tc04_g000250	1.2e-06	F:zinc ion binding	.
Tc02_g002000	0	F:oxidoreductase activity; F:ion binding; C:protein complex; C:thylakoid	.	Tc01_g034600	0	P:lipid metabolic process; F:hydrolase activity	.	Tc05_g025080	0	P:membrane organization; P:vesicle-mediated transport; C:cytoplasm; C:protein complex; C:plasma membrane; F:molecular_function	.	Tc04_g000340	0	F:oxidoreductase activity; P:catabolic process; F:ion binding; C:extracellular region; P:Response to stress	.
Tc02_g002060	0	F:GTP binding; C:nucleus; P:G-protein coupled receptor signaling pathway; F:GTPase activity; P:metabolic process; F:G-protein beta/gamma-subunit complex binding; F:signal transducer activity; P:defense response to bacterium	.	Tc01_g034680	0	F:DNA binding; F:nucleic acid binding transcription factor activity; P:cellular nitrogen compound metabolic process; P:biosynthetic process	.	Tc05_g025420	4.43e-149	F:ion binding; C:extracellular region	.	Tc04_g000510	0	F:transmembrane transporter activity; C:plasma membrane	.
Tc02_g002070	0	P:cellular protein modification process; F:kinase activity	.	Tc01_g034860	0	P:transmembrane transport; F:structural constituent of ribosome; C:cellular_component; P:translation	.	Tc05_g025740	0	F:helicase activity; C:plastid; C:thylakoid	.	Tc04_g000520	0	F:transmembrane transporter activity; C:plasma membrane	.
Tc02_g002390	9.2e-112	C:extracellular region	.	Tc01_g034880	0	C:nucleus; F:DNA binding; F:nucleic acid binding transcription factor activity; P:cellular nitrogen compound metabolic process; P:biosynthetic process	.	Tc05_g025760	0	F:transmembrane transporter activity; C:cellular_component	.	Tc04_g000620	0	P:catabolic process; F:ion binding; P:cellular protein modification process; C:cellular_component	.
Tc02_g002410	1.6e-93	C:extracellular region	.	Tc01_g034920	0	P:carbohydrate metabolic process; F:carbohydrate binding; F:isomerase activity	.	Tc05_g026160	0	P:phosphorylation; F:kinase activity	.	Tc04_g000840	0	C:nucleus; C:mitochondrion; C:plastid	.
Tc02_g002420	1.1e-114	C:extracellular region	.	Tc01_g034950	0	C:integral component of membrane	.	Tc05_g026330	1.56e-173	F:DNA binding	.	Tc04_g000930	0	C:cellular_component; F:molecular_function	.
Tc02_g002440	0	C:mitochondrion; P:cellular amino acid metabolic process; P:cell wall organization or biogenesis; P:biosynthetic process; C:plastid; F:molecular_function	.	Tc01_g034990	0	C:nucleus; P:cellular protein modification process; C:protein complex; F:molecular_function	.	Tc05_g027220	3.18e-168	C:cytoplasmic, membrane-bounded vesicle; P:Response to stress	.	Tc04_g000960	0	C:nucleus; P:generation of precursor metabolites and energy; P:photosynthesis; F:peptidase activity; C:plastid; C:thylakoid	.
Tc02_g002510	0	F:squalene monooxygenase activity; F:flavin adenine dinucleotide binding; C:integral component of membrane; P:oxidation-reduction process; P:sterol biosynthetic process; P:response to water deprivation	.	Tc01_g035030	2.91e-171	C:cellular_component	.	Tc05_g027230	2e-168	P:defense response to fungus; P:defense response to bacterium	.	Tc04_g001040	0	F:oxidoreductase activity; P:lipid metabolic process; P:biosynthetic process	.
Tc02_g002870	0	F:oxidoreductase activity; C:cellular_component	.	Tc01_g035050	3.8e-180	F:chitinase activity; F:chitin binding; P:polysaccharide catabolic process; P:Chitin catabolic process; C:cell wall; C:extracellular region	.	Tc05_g027750	0	P:cellular protein modification process; F:signal transducer activity; F:kinase activity; C:intracellular	.	Tc04_g001590	0	P:Cell division	.
Tc02_g003410	0	P:carbohydrate metabolic process; F:phosphatase activity	.	Tc01_g035120	0	F:oxidoreductase activity; P:lipid metabolic process; C:cellular_component	.	Tc05_g028380	0	C:nucleus; F:DNA binding; F:nucleic acid binding transcription factor activity; F:ion binding; P:Cell differentiation; C:protein complex; F:transcription factor binding; P:cellular nitrogen compound metabolic process; P:biosynthetic process	.	Tc04_g002063	9.45e-19	F:nucleic acid binding; P:DNA integration; P:glutamine metabolic process; P:phosphorylation; F:kinase activity; F:hydrolase activity	.
Tc02_g003420	7.9e-96	P:peptidyl-diphthamide biosynthetic process from peptidyl-histidine; C:integral component of membrane	.	Tc01_g035170	4.3e-66	C:lipid particle; P:embryo development; P:carbohydrate metabolic process; F:transferase activity, transferring acyl groups; P:lipid metabolic process; C:endoplasmic reticulum; P:biosynthetic process; C:plastid; P:Response to stress	.	Tc05_g028470	0	P:carbohydrate metabolic process; P:generation of precursor metabolites and energy; P:photosynthesis; C:plastid; F:molecular_function	.	Tc04_g002430	1.08e-161	F:DNA binding	.
Tc02_g003430	0	F:molecular_function	.	Tc01_g035330	8.5e-172	F:transcription factor activity, sequence-specific DNA binding; P:regulation of transcription, DNA-templated; F:sequence-specific DNA binding	.	Tc05_g028800	1.16e-104	C:nucleus; C:cytoplasm; F:oxidoreductase activity; F:signal transducer activity; F:kinase activity; F:enzyme binding	.	Tc04_g002530	0	F:translation initiation factor activity; P:translational initiation	.
Tc02_g003540	0	C:nucleus; C:cytoplasm; P:cellular protein modification process; F:ligase activity	.	Tc01_g035360	0	P:1-aminocyclopropane-1-carboxylate biosynthetic process; F:pyridoxal phosphate binding; F:1-aminocyclopropane-1-carboxylate synthase activity	.	Tc05_g028870	0	F:transmembrane transporter activity; C:cellular_component	.	Tc04_g003350	3.33e-86	F:structural constituent of ribosome; C:ribosome; C:plastid; C:thylakoid; P:translation	.
Tc02_g003650	0	F:oxidoreductase activity; F:ion binding; C:cellular_component	.	Tc01_g035640	3.7e-108	F:ion binding; C:cellular_component; F:ligase activity	.	Tc05_g028880	0	F:transmembrane transporter activity; C:cellular_component	.	Tc04_g004280	3.02e-31	C:cellular_component	.
Tc02_g003900	0	C:nucleus; F:DNA binding; P:anatomical structure development; P:cellular nitrogen compound metabolic process; P:biosynthetic process; P:reproduction	.	Tc01_g035660	9.1e-176	C:membrane; C:integral component of membrane	.	Tc05_g028910	0	F:helicase activity	.	Tc04_g004310	1.75e-41	C:cellular_component	.
Tc02_g003970	2.31e-155	C:cell wall; C:extracellular region; P:reproduction	.	Tc01_g035730	0	P:cellular protein modification process; F:kinase activity; C:plasma membrane; P:reproduction	.	Tc05_g029190	0	P:small molecule metabolic process; F:oxidoreductase activity; P:lipid metabolic process; F:ion binding; P:biosynthetic process	.	Tc04_g004770	6.16e-136	C:plasma membrane	.
Tc02_g004090	5.9e-85	P:auxin polar transport; P:regulation of organ growth; P:response to auxin	.	Tc01_g035860	0	F:transferase activity, transferring acyl groups; F:phosphatase activity; P:biosynthetic process; C:cellular_component	.	Tc05_g029360	0	P:biological_process; C:cytoskeleton; F:cytoskeletal protein binding	.	Tc04_g005030	3.62e-51	C:cellular_component	.
Tc02_g004110	5.89e-82	P:transport; P:growth	.	Tc01_g036300	0	C:cell; F:transferase activity, transferring glycosyl groups; P:lipid metabolic process	.	Tc05_g029380	0	C:preprophase band; P:phragmoplast assembly; C:integral component of membrane; C:microtubule associated complex	.	Tc04_g005080	0	F:androstan-3-alpha,17-beta-diol dehydrogenase activity; P:oxidation-reduction process	.
Tc02_g004130	2.9e-90	P:auxin polar transport; P:regulation of organ growth; P:response to auxin	.	Tc01_g036510	0	F:oxidoreductase activity; P:oxidation-reduction process	.	Tc05_g029530	0	F:hydrolase activity, acting on carbon-nitrogen (but not peptide) bonds; P:small molecule metabolic process; C:cytosol; P:biosynthetic process; F:ligase activity	.	Tc04_g005270	4.22e-176	P:protein complex assembly; C:plastid	.
Tc02_g004150	0	C:integral component of membrane; F:amino acid transmembrane transporter activity; P:amino acid transmembrane transport	.	Tc01_g036570	0	F:transferase activity, transferring glycosyl groups; P:lipid metabolic process; P:biosynthetic process; C:plastid	.	Tc05_g029740	0	P:biological_process; F:molecular_function	.	Tc04_g006640	3.09e-178	F:ion binding	.
Tc02_g004160	0	C:integral component of membrane; F:amino acid transmembrane transporter activity; P:amino acid transmembrane transport	.	Tc01_g036660	0	F:ion binding; C:vacuole	.	Tc05_g029790	0	P:generation of precursor metabolites and energy; F:phosphatase activity; P:photosynthesis; C:plastid; C:thylakoid	.	Tc04_g007290	0	P:carbohydrate metabolic process; F:oxidoreductase activity; C:cellular_component	.
Tc02_g004330	0	P:transmembrane transport; C:cellular_component	.	Tc01_g036680	0	P:cellular protein modification process; F:kinase activity	.	Tc05_g030140	0	F:ion binding; P:transport	.	Tc04_g008110	2.48e-75	C:membrane	.
Tc02_g004640	0	F:phosphatase activity; F:ion binding; P:cellular protein modification process; C:cellular_component	.	Tc01_g036750	0	C:endosome; C:Golgi apparatus; F:methyltransferase activity; C:vacuole	.	Tc05_g030230	0	C:cellular_component; F:molecular_function	.	Tc04_g009010	0	P:carbohydrate metabolic process; F:transferase activity, transferring glycosyl groups; P:biosynthetic process; C:plastid	.
Tc02_g004660	0	F:phosphatase activity; F:ion binding; P:cellular protein modification process; C:cellular_component	.	Tc01_g036940	0	C:Golgi apparatus; C:plasma membrane	.	Tc05_g030370	0	F:transmembrane transporter activity; C:cellular_component	.	Tc04_g009150	6.79e-140	P:cell morphogenesis; C:cell wall; P:cell wall organization or biogenesis; C:extracellular region; P:growth	.
Tc02_g004690	0	C:cellular_component	.	Tc01_g037000	0	F:molecular_function	.	Tc05_g031350	4e-21	C:integral component of membrane	.	Tc04_g009180	0	F:ion binding	.
Tc02_g004730	0	F:FAD binding; F:oxidoreductase activity; F:metal ion binding; C:photosystem II; C:integral component of membrane; P:photosynthesis; P:oxidation-reduction process	.	Tc01_g037370	8.8e-179	C:integral component of membrane	.	Tc05_g031510	0	F:GTP binding; P:transmembrane transport; F:transmembrane transporter activity; P:small GTPase mediated signal transduction; P:protein transport; C:integral component of membrane; C:intracellular; C:plasma membrane	.	Tc04_g009600	4.5e-176	C:nucleus	.
Tc02_g004800	0	P:chromosome organization; P:chromosome segregation; P:mitotic nuclear division; F:molecular_function	.	Tc01_g037620	0	F:iron ion binding; F:oxidoreductase activity; C:integral component of membrane; P:oxidation-reduction process; P:fatty acid biosynthetic process	.	Tc05_g031700	0	C:nucleus; F:ATP binding; C:cytoplasm; P:histone H3-T3 phosphorylation; F:histone kinase activity (H3-T3 specific); P:mitotic nuclear division; P:histone H3-T11 phosphorylation; F:histone kinase activity (H3-T11 specific)	.	Tc04_g009760	2.63e-101	C:plasma membrane; F:molecular_function	.
Tc02_g004920	0	F:oxidoreductase activity; P:oxidation-reduction process	.	Tc01_g037670	0	F:oxidoreductase activity; P:lipid metabolic process; P:biosynthetic process	.	Tc05_g031710	0	P:carbohydrate metabolic process; C:plasma membrane; F:hydrolase activity, acting on glycosyl bonds	.	Tc04_g010220	0	C:spindle; P:activation of protein kinase activity; P:regulation of mitotic spindle organization; C:microtubule	.
Tc02_g004940	0	C:nucleus; F:ion binding; P:cellular protein modification process; P:Response to stress	.	Tc01_g037800	0	P:carbohydrate metabolic process; C:cellular_component; F:isomerase activity	.	Tc06_g000210	0	C:nucleus; F:DNA binding; F:lipid binding	.	Tc04_g010370	2.35e-64	F:protein dimerization activity	.
Tc02_g004980	0	F:DNA binding; F:nucleic acid binding transcription factor activity; P:cellular nitrogen compound metabolic process; P:biosynthetic process	.	Tc01_g037810	0	P:cellular amino acid metabolic process; P:biosynthetic process; F:transferase activity, transferring alkyl or aryl (other than methyl) groups	.	Tc06_g000280	0	P:small molecule metabolic process; C:peroxisome; P:cofactor metabolic process; P:biosynthetic process; C:plastid; F:molecular_function	.	Tc04_g010480	0	P:carbohydrate metabolic process; F:ion binding; F:hydrolase activity, acting on glycosyl bonds	.
Tc02_g005010	2.4e-101	F:ATP binding; P:metabolic process; F:ligase activity	.	Tc01_g037820	0	P:biological_process; F:molecular_function	.	Tc06_g000510	0	P:cell morphogenesis; P:cellular protein modification process; F:kinase activity; C:plasma membrane; P:growth	.	Tc04_g010550	0	F:molecular_function	.
Tc02_g005040	0	P:carbohydrate metabolic process; C:cell wall; C:vacuole; F:hydrolase activity, acting on glycosyl bonds	.	Tc01_g037870	2.5e-133	P:negative regulation of catalytic activity; F:enzyme inhibitor activity; P:double fertilization forming a zygote and endosperm	.	Tc06_g000520	3.5e-136	P:vacuolar transport; C:intracellular	.	Tc04_g010610	2.7e-60	C:nucleus	.
Tc02_g005090	5.45e-161	C:nucleus; C:cytoplasm; P:catabolic process; C:protein complex; F:peptidase activity	.	Tc01_g037920	0	P:carbohydrate metabolic process; P:catabolic process; C:cell wall; P:cell wall organization or biogenesis; C:extracellular region; F:enzyme regulator activity	.	Tc06_g000700	6.61e-179	F:ADP binding; P:defense response	.	Tc04_g010730	0	F:transferase activity	.
Tc02_g005170	0	C:cellular_component	.	Tc01_g037930	8.16e-168	P:carbohydrate metabolic process; P:catabolic process; C:cell wall; P:cell wall organization or biogenesis; C:extracellular region; F:enzyme regulator activity	.	Tc06_g000710	7.84e-21	P:membrane organization; C:protein complex; C:vacuole; P:transport; C:plasma membrane; F:molecular_function	.	Tc04_g010900	0	F:transferase activity, transferring acyl groups	.
Tc02_g005240	0	C:nucleus; P:cytoskeleton organization; C:cytoplasm; P:cell morphogenesis; P:Cell differentiation; P:reproduction; P:growth	.	Tc01_g038050	6.8e-38	P:biological_process; F:molecular_function	.	Tc06_g002000	0	F:oxidoreductase activity	.	Tc04_g010980	4.54e-92	C:cellular_component	.
Tc02_g005470	6.84e-170	F:translation factor activity, RNA binding	.	Tc01_g038180	8.7e-176	C:endoplasmic reticulum; P:cellular response to phosphate starvation	.	Tc06_g002330	0	C:nucleus; C:integral component of membrane; C:cytosol; P:transport; C:plasma membrane; F:transporter activity	.	Tc04_g011260	4.42e-79	C:membrane; C:integral component of membrane	.
Tc02_g005600	2.46e-18	C:cellular_component	.	Tc01_g038460	1.46e-72	C:cellular_component	.	Tc06_g002380	0	F:nucleic acid binding	.	Tc04_g011930	1.29e-129	F:DNA binding; F:nucleic acid binding transcription factor activity; P:cellular nitrogen compound metabolic process; P:biosynthetic process	.
Tc02_g005640	0	P:polyketide biosynthetic process; P:sporopollenin biosynthetic process; C:endoplasmic reticulum; F:naringenin-chalcone synthase activity; F:tetraketide alpha-pyrone synthase activity	.	Tc01_g038470	0	F:ion binding; F:peptidase activity; C:extracellular region	.	Tc06_g002652	0	P:biological_process; F:molecular_function	.	Tc04_g012360	0	P:cellular protein modification process; F:kinase activity	.
Tc02_g005820	2.36e-64	P:biological_process	.	Tc01_g038880	8.11e-13	C:cellular_component	.	Tc06_g002750	0	P:small molecule metabolic process; F:oxidoreductase activity; P:lipid metabolic process; F:ion binding; P:biosynthetic process; C:cellular_component	.	Tc04_g012391	8.75e-139	F:molecular_function	.
Tc02_g005950	1.33e-61	P:biological_process	.	Tc01_g039000	6.1e-27	F:3-beta-hydroxy-delta5-steroid dehydrogenase activity; F:oxidoreductase activity, acting on the CH-OH group of donors, NAD or NADP as acceptor; C:membrane; C:integral component of membrane; P:oxidation-reduction process; P:steroid biosynthetic process	.	Tc06_g002940	0	P:carbohydrate metabolic process; C:cellular_component; F:hydrolase activity, acting on glycosyl bonds	.	Tc04_g012730	1.1e-90	F:ATP binding; C:membrane; C:integral component of membrane; F:protein kinase activity; P:phosphorylation; P:protein phosphorylation; F:kinase activity	.
Tc02_g005970	3.78e-63	P:biological_process	.	Tc01_g039100	1.34e-110	C:cellular_component	.	Tc06_g002960	1.4e-87	F:adenine phosphoribosyltransferase activity; C:cytoplasm; P:nucleoside metabolic process; P:adenine salvage	.	Tc04_g012770	2.68e-80	C:cellular_component; F:kinase activity	.
Tc02_g006330	0	P:catabolic process; F:lyase activity; P:cellular amino acid metabolic process; P:cellular nitrogen compound metabolic process; P:biosynthetic process	.	Tc01_g039210	2.42e-148	C:nucleus; F:DNA binding; F:nucleic acid binding transcription factor activity; P:cellular nitrogen compound metabolic process; P:biosynthetic process	.	Tc06_g003060	1.1e-174	C:cellular_component	.	Tc04_g012840	1.93e-53	F:kinase activity	.
Tc02_g006390	9.82e-156	F:ion binding; C:intracellular	.	Tc01_g039220	4.7e-156	C:nucleus; F:DNA binding; F:transcription factor activity, sequence-specific DNA binding; P:transcription, DNA-templated; P:regulation of transcription, DNA-templated	.	Tc06_g003200	0	F:molecular_function	.	Tc04_g012940	1.1e-140	F:organic cyclic compound binding; F:heterocyclic compound binding	.
Tc02_g006450	1.12e-156	C:mitochondrion; F:ion binding; C:vacuole	.	Tc01_g039230	1.7e-140	C:nucleus; F:DNA binding; F:transcription factor activity, sequence-specific DNA binding; P:transcription, DNA-templated; P:regulation of transcription, DNA-templated	.	Tc06_g003870	0	P:cellular protein modification process; C:cellular_component; F:kinase activity	.	Tc04_g013170	0	P:carbohydrate metabolic process; F:hydrolase activity, acting on glycosyl bonds	.
Tc02_g006790	4.5e-55	F:metal ion binding; C:integral component of membrane; F:catechol oxidase activity; P:oxidation-reduction process	.	Tc01_g039410	0	F:ATP binding; C:integral component of membrane; F:protein serine/threonine kinase activity; P:protein phosphorylation; F:polysaccharide binding	.	Tc06_g003980	1.55e-137	C:cytoplasm	.	Tc04_g013930	0	P:biological_process; F:molecular_function	.
Tc02_g006800	0	F:oxidoreductase activity; F:ion binding; C:cellular_component	.	Tc01_g039430	0	P:cellular protein modification process; C:cellular_component; F:kinase activity	.	Tc06_g004280	4.9e-25	C:cellular_component; P:transport; F:molecular_function	.	Tc04_g014560	7.71e-131	F:DNA binding; P:signal transduction; F:ion binding; P:Cell differentiation; P:anatomical structure development; C:cytosol; C:ribosome	.
Tc02_g006850	1.46e-113	C:cytoplasm; C:plasma membrane; F:molecular_function; P:Response to stress	.	Tc01_g039480	0	P:cellular protein modification process; C:cellular_component; F:kinase activity	.	Tc06_g004370	0	P:catabolic process; F:peptidase activity; C:extracellular region	.	Tc04_g014690	7.67e-55	F:ligase activity	.
Tc02_g006940	3.16e-25	P:RNA phosphodiester bond hydrolysis, endonucleolytic; F:nucleic acid binding; F:RNA-DNA hybrid ribonuclease activity; C:membrane; C:integral component of membrane	.	Tc01_g039490	0	P:cellular protein modification process; C:cellular_component; F:kinase activity	.	Tc06_g004590	0	P:cellular protein modification process; F:kinase activity; C:plasma membrane	.	Tc04_g015010	3.72e-159	F:oxidoreductase activity; P:cellular protein modification process; C:plastid	.
Tc02_g006950	0	P:small molecule metabolic process; F:transferase activity, transferring acyl groups; P:lipid metabolic process; P:biosynthetic process; C:cellular_component	.	Tc01_g039540	1.06e-114	P:cellular protein modification process; F:kinase activity; P:Cell cycle; F:enzyme binding	.	Tc06_g004600	3e-105	F:electron carrier activity; C:integral component of membrane; C:anchored component of plasma membrane	.	Tc04_g015160	0	F:peptidase activity; C:cellular_component	.
Tc02_g006960	2.09e-65	C:nucleus; F:DNA binding	.	Tc01_g039560	7.5e-100	C:integral component of membrane	.	Tc06_g004610	6.55e-103	C:plasma membrane; F:molecular_function	.	Tc04_g015420	0	F:aspartic-type endopeptidase activity; P:protein catabolic process; P:proteolysis; C:integral component of membrane; C:extracellular region	.
Tc02_g006980	0	P:cellular protein modification process; C:cellular_component; F:kinase activity	.	Tc01_g039570	0	C:integral component of membrane	.	Tc06_g007230	1.26e-92	C:cytoskeleton; P:cytoskeleton organization; C:cytoplasm; P:protein complex assembly; F:cytoskeletal protein binding	.	Tc04_g015440	0	P:secondary metabolic process; C:nucleus; F:DNA binding; F:oxidoreductase activity; F:ion binding; P:cellular nitrogen compound metabolic process; P:biosynthetic process	.
Tc02_g007040	1.2e-124	F:nucleic acid binding; C:nucleus; P:metabolic process; F:transferase activity	.	Tc01_g039591	0	F:nucleic acid binding	.	Tc06_g007490	0	F:ATPase activity; F:transmembrane transporter activity; C:plasma membrane	.	Tc04_g015680	0	F:oxidoreductase activity; P:cellular protein modification process; C:cellular_component; F:kinase activity	.
Tc02_g007290	2.45e-168	C:nucleus; F:DNA binding; F:nucleic acid binding transcription factor activity; F:ion binding; P:Cell differentiation; C:protein complex; F:transcription factor binding; P:cellular nitrogen compound metabolic process; P:biosynthetic process	.	Tc01_g039600	1.38e-128	C:cellular_component	.	Tc06_g007730	2.38e-128	C:membrane; C:integral component of membrane	.	Tc04_g016490	0	F:transmembrane transporter activity; C:plasma membrane	.
Tc02_g007320	0	P:lipid metabolic process; P:biosynthetic process; C:cellular_component; F:transferase activity, transferring alkyl or aryl (other than methyl) groups	.	Tc01_g039611	0	F:zinc ion binding	.	Tc06_g007790	2.6e-142	C:integral component of membrane; C:plasma membrane	.	Tc04_g016550	0	F:DNA binding; C:integral component of membrane	.
Tc02_g007330	2.96e-144	P:lipid metabolic process; P:biosynthetic process; C:cellular_component; F:transferase activity, transferring alkyl or aryl (other than methyl) groups	.	Tc01_g039650	7.44e-53	C:cellular_component	.	Tc06_g007890	1.09e-86	F:molecular_function	.	Tc04_g016680	0	P:lipid metabolic process; C:cytosol	.
Tc02_g007410	0	F:molecular_function	.	Tc01_g039660	2.59e-146	F:molecular_function	.	Tc06_g007990	6.75e-141	F:transmembrane transporter activity; P:homeostatic process; C:cell wall; C:Golgi apparatus; C:vacuole; C:plasma membrane; C:plastid	.	Tc04_g016710	0	F:oxidoreductase activity; C:cellular_component	.
Tc02_g007600	6.81e-101	F:molecular_function	.	Tc01_g039670	2.68e-109	C:cellular_component	.	Tc06_g008350	6.82e-51	P:photosynthesis; C:protein complex; C:plastid; C:thylakoid	.	Tc04_g016920	0	F:oxidoreductase activity; F:ion binding	.
Tc02_g007650	0	P:cellular protein modification process; C:cellular_component; F:kinase activity	.	Tc01_g039690	8.4e-107	C:integral component of membrane	.	Tc06_g008450	5.18e-164	C:cellular_component	.	Tc04_g016980	0	F:oxidoreductase activity; F:ion binding	.
Tc02_g008010	0	P:cellular component assembly; P:extracellular matrix organization; P:cell wall organization or biogenesis; C:cellular_component; P:growth	.	Tc01_g039700	1.1e-98	C:integral component of membrane	.	Tc06_g008970	0	F:phosphatase activity	.	Tc04_g017260	0	C:plasma membrane	.
Tc02_g008030	1.43e-79	C:nucleus; F:DNA binding; P:cellular nitrogen compound metabolic process; P:biosynthetic process	.	Tc01_g039710	0	C:integral component of membrane	.	Tc06_g009640	4.42e-169	C:nucleus; C:cytoplasm; F:histone binding; P:chromosome organization; P:protein complex assembly	.	Tc04_g017440	3.6e-121	C:integral component of membrane	.
Tc02_g008040	2.7e-92	C:nucleus; F:DNA binding; P:transcription, DNA-templated; P:regulation of transcription, DNA-templated	.	Tc01_g039760	0	C:cellular_component; F:molecular_function	.	Tc06_g010280	9.47e-168	C:cellular_component	.	Tc04_g017610	1.87e-102	F:DNA binding	.
Tc02_g008050	1.66e-80	C:nucleus; F:DNA binding; P:cellular nitrogen compound metabolic process; P:biosynthetic process	.	Tc01_g039770	0	P:metabolic process; C:integral component of membrane; F:transferase activity	.	Tc06_g010630	0	C:cell wall; F:peptidase activity	.	Tc04_g017620	5.75e-140	F:ion binding; C:cellular_component; F:ligase activity	.
Tc02_g008090	3.1e-80	C:nucleus; F:DNA binding; P:transcription, DNA-templated; P:regulation of transcription, DNA-templated	.	Tc01_g039780	1.8e-129	F:GTP binding; P:nucleocytoplasmic transport; F:sphingomyelin phosphodiesterase activity; P:small GTPase mediated signal transduction; F:GTPase activity; P:metabolic process; P:intracellular protein transport; C:intracellular; C:plasma membrane	.	Tc06_g010900	0	P:lipid metabolic process; F:molecular_function	.	Tc04_g018270	1e-159	C:cytoplasm; F:enzyme regulator activity	.
Tc02_g008100	2.8e-90	F:DNA binding; C:nucleus; P:transcription, DNA-templated; P:regulation of transcription, DNA-templated	.	Tc01_g039870	0	P:cellular protein modification process; F:kinase activity	.	Tc06_g011120	1.49e-50	C:nucleus; F:DNA binding; P:chromosome organization; P:protein complex assembly; C:chromosome; C:protein complex	.	Tc04_g018280	0	F:kinase activity	.
Tc02_g008110	6.9e-67	C:nucleus; F:DNA binding; P:transcription, DNA-templated; P:regulation of transcription, DNA-templated	.	Tc01_g040140	0	P:catabolic process; F:peptidase activity; C:cellular_component	.	Tc06_g011150	1.12e-74	P:biological_process	.	Tc04_g018460	0	F:oxidoreductase activity; P:cellular protein modification process; C:cellular_component; F:kinase activity	.
Tc02_g008120	7.5e-88	C:nucleus; F:DNA binding; P:transcription, DNA-templated; P:regulation of transcription, DNA-templated	.	Tc01_g040280	0	P:carbohydrate metabolic process; P:cellular nitrogen compound metabolic process; P:biosynthetic process; F:molecular_function	.	Tc06_g011270	2.9e-29	C:integral component of membrane	.	Tc04_g018710	0	C:endosome; C:Golgi apparatus; F:methyltransferase activity; C:vacuole	.
Tc02_g008280	0	F:hydrolase activity	.	Tc01_g040370	0	F:oxidoreductase activity; P:catabolic process; P:cellular nitrogen compound metabolic process	.	Tc06_g011280	0	F:transmembrane transporter activity; C:cellular_component	.	Tc04_g018990	1.06e-124	F:ADP binding; P:defense response	.
Tc02_g008450	1.82e-123	F:molecular_function	.	Tc01_g040390	1.7e-54	P:biological_process; F:molecular_function	.	Tc06_g011330	3.16e-118	P:photosynthesis; C:protein complex; C:thylakoid	.	Tc04_g019510	3.9e-45	C:membrane; C:integral component of membrane	.
Tc02_g008460	4.2e-124	F:electron carrier activity; C:membrane	.	Tc01_g040600	0	P:pectin catabolic process; P:pollen sperm Cell differentiation; F:lyase activity; F:polygalacturonase activity; P:cell wall organization; C:extracellular region; P:anther dehiscence; P:fruit dehiscence	.	Tc06_g011690	0	C:cellular_component	.	Tc04_g019650	0	P:small molecule metabolic process; P:catabolic process; F:molecular_function	.
Tc02_g008470	0	F:oxidoreductase activity; F:ion binding; C:cellular_component	.	Tc01_g040670	0	F:transmembrane transporter activity; C:plasma membrane	.	Tc06_g011870	3.84e-150	P:cellular protein modification process; C:endoplasmic reticulum; P:protein folding; F:isomerase activity	.	Tc04_g019740	0	C:nucleus; F:transcription factor activity, sequence-specific DNA binding; P:transcription, DNA-templated; P:regulation of transcription, DNA-templated; F:sequence-specific DNA binding	.
Tc02_g008530	0	C:plasma membrane	.	Tc01_g040740	0	P:transmembrane transport; C:mitochondrion; F:molecular_function	.	Tc06_g012740	0	C:integral component of membrane	.	Tc04_g019760	0	P:phosphorylation; F:kinase activity	.
Tc02_g008570	9.63e-33	F:molecular_function	.	Tc01_g040850	2.74e-83	F:DNA binding; F:ion binding	.	Tc06_g012810	0	P:biological_process; C:cellular_component	.	Tc04_g019890	0	P:cellular protein modification process; C:cellular_component; F:kinase activity	.
Tc02_g008660	1.9e-136	C:cellular_component	.	Tc01_g040900	0	F:transferase activity, transferring glycosyl groups; C:cellular_component	.	Tc06_g013040	0	P:generation of precursor metabolites and energy; F:ion binding; P:cellular protein modification process; P:photosynthesis; C:protein complex; C:plastid; C:thylakoid	.	Tc04_g019960	0	F:RNA binding; C:nucleolus; C:plastid	.
Tc02_g008760	0	P:small molecule metabolic process; F:transferase activity, transferring acyl groups; P:lipid metabolic process; C:endoplasmic reticulum; C:Golgi apparatus; P:biosynthetic process; C:plasma membrane	.	Tc01_g041050	0	F:transferase activity, transferring glycosyl groups; C:cytoplasm; P:metabolic process; C:integral component of membrane	.	Tc06_g013050	0	P:generation of precursor metabolites and energy; F:ion binding; P:cellular protein modification process; P:photosynthesis; C:protein complex; C:plastid; C:thylakoid	.	Tc04_g019970	1.69e-154	P:signal transduction; C:intracellular; F:molecular_function	.
Tc02_g008790	0	C:chloroplast stroma; F:metal ion binding; C:mitochondrion; C:membrane; C:apoplast; P:oxidation-reduction process; F:4 iron, 4 sulfur cluster binding; F:heme binding; F:ferredoxin-nitrite reductase activity; P:nitrate assimilation	.	Tc02_g000010	0	P:cellular amino acid metabolic process; P:cellular nitrogen compound metabolic process; P:biosynthetic process; F:ligase activity	.	Tc06_g013280	0	C:nucleus; P:cellular protein modification process; P:cellular nitrogen compound metabolic process; P:biosynthetic process; F:kinase activity; F:signal transducer activity	.	Tc04_g020020	0	P:biological_process; F:cytoskeletal protein binding	.
Tc02_g008800	0	F:transferase activity, transferring glycosyl groups; P:cellular protein modification process; C:Golgi apparatus; P:biosynthetic process	.	Tc02_g000120	0	F:zinc ion binding	.	Tc06_g013420	0	C:cell wall; C:apoplast; P:cell wall organization; F:hydrolase activity, hydrolyzing O-glycosyl compounds; F:xyloglucan:xyloglucosyl transferase activity; P:xyloglucan metabolic process; P:cell wall biogenesis	.	Tc04_g020180	0	C:plastid	.
Tc02_g008810	0	P:metabolic process; F:ligase activity	.	Tc02_g000460	3.47e-120	C:nucleus; F:RNA binding	.	Tc06_g013520	0	F:oxidoreductase activity; C:cell wall; F:peptidase activity	.	Tc04_g020200	0	P:carbohydrate metabolic process; F:transferase activity, transferring glycosyl groups; C:cell wall; P:cell wall organization or biogenesis; C:extracellular region; F:hydrolase activity, acting on glycosyl bonds	.
Tc02_g008820	6.84e-89	C:nucleus	.	Tc02_g000490	0	F:ATPase activity; C:endosome; F:transmembrane transporter activity; F:ion binding; C:Golgi apparatus; C:plasma membrane	.	Tc06_g013560	0	F:molecular_function	.	Tc04_g020230	0	C:cellular_component; F:isomerase activity	.
Tc02_g008960	6.54e-176	P:embryo development; F:DNA binding; P:reproduction	.	Tc02_g000660	3.7e-84	P:carbohydrate metabolic process; F:hydrolase activity, hydrolyzing O-glycosyl compounds	.	Tc06_g013570	4.8e-166	C:nucleus; F:DNA binding; F:transcription factor activity, sequence-specific DNA binding; P:transcription, DNA-templated; P:regulation of transcription, DNA-templated; F:protein dimerization activity	.	Tc04_g020360	9.37e-58	C:extracellular region; F:signal transducer activity	.
Tc02_g009090	5.39e-169	P:homeostatic process; C:plastid	.	Tc02_g000860	0	F:ion binding	.	Tc06_g013720	9.2e-121	F:nucleic acid binding	.	Tc04_g020370	1.48e-63	F:signal transducer activity; C:intracellular	.
Tc02_g009230	3.7e-39	P:flavonoid glucuronidation; F:quercetin 3-O-glucosyltransferase activity; C:intracellular membrane-bounded organelle; F:quercetin 7-O-glucosyltransferase activity; P:flavonoid biosynthetic process	.	Tc02_g001040	0	C:endosome; F:transmembrane transporter activity; C:Golgi apparatus; C:plasma membrane	.	Tc06_g013770	0	F:phosphoprotein phosphatase activity; P:protein dephosphorylation	.	Tc04_g020450	2.47e-73	F:signal transducer activity; C:intracellular	.
Tc02_g009240	1.2e-64	P:flavonoid glucuronidation; F:quercetin 3-O-glucosyltransferase activity; C:intracellular membrane-bounded organelle; F:quercetin 7-O-glucosyltransferase activity; P:flavonoid biosynthetic process	.	Tc02_g001260	1.28e-78	P:biological_process; C:mitochondrion; F:ion binding	.	Tc06_g013890	0	P:reproduction	.	Tc04_g020780	0	P:carbohydrate metabolic process; F:transferase activity, transferring glycosyl groups; C:Golgi apparatus	.
Tc02_g009260	0	C:extracellular space; F:oxidoreductase activity; P:catabolic process; F:peptidase activity; C:lysosome	.	Tc02_g001480	0	F:iron ion binding; F:oxidoreductase activity; C:integral component of membrane; P:oxidation-reduction process; P:fatty acid biosynthetic process	.	Tc06_g014140	0	F:transferase activity, transferring glycosyl groups; C:cellular_component	.	Tc04_g021130	0	F:phosphatase activity; F:ion binding; C:cellular_component	.
Tc02_g009280	6e-95	C:plasmodesma; F:calcium ion binding; C:cytosol; C:plasma membrane; F:calcium-dependent phospholipid binding	.	Tc02_g001700	9.2e-128	C:integral component of membrane	.	Tc06_g014150	0	P:transmembrane transport; C:cellular_component; F:molecular_function	.	Tc04_g021140	0	F:phosphatase activity; F:ion binding; C:cellular_component	.
Tc02_g009470	6.37e-156	F:DNA binding	.	Tc02_g001780	1.35e-156	C:cellular_component; F:kinase activity	.	Tc06_g014470	0	C:extracellular space; P:catabolic process; F:peptidase activity; C:lysosome	.	Tc04_g021890	2.97e-83	C:cellular_component	.
Tc02_g009620	0	P:cellular amino acid metabolic process; P:biosynthetic process; F:kinase activity	.	Tc02_g001790	7.5e-83	C:integral component of membrane; P:phosphorylation; F:kinase activity	.	Tc06_g014600	0	C:cellular_component	.	Tc04_g022060	1.77e-144	P:sulfur compound metabolic process; P:cofactor metabolic process; P:cellular component assembly; F:ion binding; P:biosynthetic process; C:plastid	.
Tc02_g009890	0	F:coenzyme binding; F:3-oxo-5-beta-steroid 4-dehydrogenase activity; P:oxidation-reduction process	.	Tc02_g001840	0	C:nucleus; F:DNA binding; P:transcription, DNA-templated; P:regulation of transcription, DNA-templated	.	Tc06_g014700	0	F:molecular_function	.	Tc04_g022550	4.98e-150	F:molecular_function	.
Tc02_g009910	0	F:phosphatase activity; F:ion binding; P:cellular protein modification process	.	Tc02_g001870	0	C:integral component of membrane; P:phosphorylation; F:kinase activity	.	Tc06_g015290	0	C:cellular_component; P:transport; F:molecular_function	.	Tc04_g022590	3.4e-112	P:metabolic process; F:ligase activity	.
Tc02_g009920	9.11e-131	F:ion binding	.	Tc02_g001910	8.4e-166	P:sulfur compound metabolic process; P:cofactor metabolic process; P:cellular component assembly; F:ion binding; P:biosynthetic process; C:plasma membrane; C:plastid; P:Response to stress	.	Tc06_g015310	0	F:unfolded protein binding; P:protein folding	.	Tc04_g022630	0	P:cellular amino acid metabolic process; P:biosynthetic process; F:ligase activity	.
Tc02_g009930	2.96e-76	P:Response to stress	.	Tc02_g002000	0	F:iron ion binding; F:oxidoreductase activity, acting on paired donors, with incorporation or reduction of molecular oxygen; C:cytochrome b6f complex; C:integral component of membrane; P:oxidation-reduction process; F:monooxygenase activity; F:heme binding	.	Tc06_g015600	2.61e-141	C:nucleus; F:RNA binding; F:structural constituent of ribosome; C:ribosome; C:plastid; C:thylakoid; P:translation	.	Tc04_g022730	1.97e-168	F:molecular_function	.
Tc02_g010000	2.05e-178	F:oxidoreductase activity; C:cellular_component	.	Tc02_g002060	0	F:GTP binding; C:nucleus; P:G-protein coupled receptor signaling pathway; F:GTPase activity; P:metabolic process; F:G-protein beta/gamma-subunit complex binding; F:signal transducer activity; P:defense response to bacterium	.	Tc06_g015680	6.6e-86	F:structural constituent of cell wall	.	Tc04_g022860	0	C:cellular_component	.
Tc02_g010120	1.5e-143	F:DNA binding; F:metal ion binding	.	Tc02_g002070	0	F:myosin heavy chain kinase activity; P:protein phosphorylation	.	Tc06_g015870	0	F:ion binding; F:phosphatase activity; C:cytosol	.	Tc04_g022920	3.5e-66	C:cytoplasm; F:metal ion binding; C:cell wall; P:metal ion transport	.
Tc02_g010200	2.1e-55	P:polysaccharide catabolic process; C:cell wall; F:hydrolase activity, hydrolyzing O-glycosyl compounds; P:single-organism process; P:cellular process	.	Tc02_g002120	0	F:ion binding; C:cellular_component	.	Tc06_g016520	0	P:embryo development; P:Cell proliferation; P:cell morphogenesis; P:cellular protein modification process; P:Cell differentiation; F:kinase activity; C:plasma membrane; P:reproduction	.	Tc04_g022940	9.73e-144	C:nucleus; P:cell death; C:cytoplasm; P:signal transduction; F:phosphatase activity; P:cellular protein modification process; C:plasma membrane; P:Response to stress; P:immune system process	.
Tc02_g010210	0	C:nucleus; P:response to salt stress; C:cytoplasm	.	Tc02_g002230	1.9e-116	F:oxygen binding; F:metal ion binding; P:oxygen transport; P:nitrogen fixation; F:oxygen transporter activity; F:heme binding	.	Tc06_g016590	1.2e-14	F:isomerase activity	.	Tc04_g023190	0	F:ATPase activity; F:helicase activity; P:cellular nitrogen compound metabolic process	.
Tc02_g010380	0	P:cellular protein modification process; C:extracellular region; F:kinase activity	.	Tc02_g002390	9.3e-112	C:extracellular region	.	Tc06_g018010	3.55e-10	P:RNA phosphodiester bond hydrolysis, endonucleolytic; F:nucleic acid binding; F:RNA-DNA hybrid ribonuclease activity; C:membrane; C:integral component of membrane	.	Tc04_g023240	0	P:cytoskeleton organization; C:cytoplasm; P:cellular protein modification process; C:extracellular region; F:signal transducer activity; F:kinase activity	.
Tc02_g010410	0	P:cellular protein modification process; C:cellular_component; F:kinase activity	.	Tc02_g002400	6.11e-118	C:extracellular region	.	Tc06_g018020	3.18e-149	P:cellular protein modification process; F:kinase activity; C:plasma membrane	.	Tc04_g023490	0	P:small molecule metabolic process; F:oxidoreductase activity; P:lipid metabolic process; F:ion binding; P:biosynthetic process; C:cellular_component	.
Tc02_g010490	0	P:flavonoid glucuronidation; F:quercetin 3-O-glucosyltransferase activity; C:intracellular membrane-bounded organelle; F:quercetin 7-O-glucosyltransferase activity; P:flavonoid biosynthetic process	.	Tc02_g002410	1.6e-93	C:extracellular region	.	Tc06_g018090	0	F:ATPase activity; P:biological_process; C:cytoskeleton; C:protein complex; F:cytoskeletal protein binding	.	Tc04_g023500	9.2e-138	P:photosynthesis; C:photosystem I reaction center	.
Tc02_g010510	0	F:transferase activity, transferring glycosyl groups; C:Golgi apparatus	.	Tc02_g002420	3.19e-115	C:extracellular region	.	Tc06_g018580	1.26e-154	C:cellular_component	.	Tc04_g023620	0	F:oxidoreductase activity	.
Tc02_g010550	0	F:transferase activity, transferring glycosyl groups; C:Golgi apparatus	.	Tc02_g002440	0	F:L-leucine transaminase activity; P:isoleucine biosynthetic process; F:L-valine transaminase activity; C:chloroplast; P:valine biosynthetic process; C:mitochondrion; P:leucine biosynthetic process; F:L-isoleucine transaminase activity; P:plant-type cell wall organization or biogenesis	.	Tc06_g018730	0	P:pectin catabolic process; P:negative regulation of catalytic activity; C:cell wall; F:aspartyl esterase activity; C:integral component of membrane; C:extracellular region; F:pectinesterase inhibitor activity; P:cell wall modification; F:pectinesterase activity	.	Tc04_g024040	1.4e-125	C:integral component of membrane	.
Tc02_g010830	0	F:structural constituent of ribosome; C:mitochondrion; P:transport; P:translation	.	Tc02_g002510	0	F:squalene monooxygenase activity; F:flavin adenine dinucleotide binding; C:integral component of membrane; P:oxidation-reduction process; P:sterol biosynthetic process; P:response to water deprivation	.	Tc06_g018740	0	P:cellular component assembly; P:extracellular matrix organization; P:cell wall organization or biogenesis; C:cellular_component; P:growth; F:hydrolase activity, acting on glycosyl bonds	.	Tc04_g024060	0	F:ATP binding; P:virus induced gene silencing; P:posttranscriptional gene silencing by RNA; P:metabolic process; F:helicase activity	.
Tc02_g010870	0	C:nucleus; F:DNA binding	.	Tc02_g003250	0	F:DNA binding; F:nucleic acid binding transcription factor activity; P:cellular nitrogen compound metabolic process; P:biosynthetic process	.	Tc06_g019060	0	F:transmembrane transporter activity; C:cellular_component	.	Tc04_g024180	0	F:cytoskeletal protein binding; C:cellular_component; F:kinase activity	.
Tc02_g011000	0	C:cellular_component	.	Tc02_g003410	0	P:carbohydrate metabolic process; F:fructose 1,6-bisphosphate 1-phosphatase activity; P:dephosphorylation	.	Tc06_g019070	0	F:transmembrane transporter activity; C:cellular_component	.	Tc04_g024220	0	F:transmembrane transporter activity; C:plasma membrane	.
Tc02_g011020	1.44e-39	C:cellular_component	.	Tc02_g003420	7.9e-96	P:peptidyl-diphthamide biosynthetic process from peptidyl-histidine; C:integral component of membrane	.	Tc06_g019080	0	F:transmembrane transporter activity; C:cellular_component	.	Tc04_g024260	0	C:plasma membrane	.
Tc02_g011112	3.31e-170	F:nucleotide binding; P:RNA phosphodiester bond hydrolysis, endonucleolytic; F:nucleic acid binding; F:RNA-DNA hybrid ribonuclease activity	.	Tc02_g003430	0	F:molecular_function	.	Tc06_g019150	0	F:oxidoreductase activity; P:catabolic process; C:cell wall; F:ion binding; P:cell wall organization or biogenesis; C:extracellular region; P:Response to stress	.	Tc04_g024280	0	P:catabolic process; P:cofactor metabolic process; P:cellular nitrogen compound metabolic process; F:molecular_function	.
Tc02_g011120	9.15e-52	C:cellular_component	.	Tc02_g003450	3e-124	C:integral component of membrane	.	Tc06_g019200	0	F:ATPase activity; P:small molecule metabolic process; F:transmembrane transporter activity; C:protein complex; P:cellular nitrogen compound metabolic process; P:biosynthetic process; C:intracellular	.	Tc04_g024320	1.48e-136	C:nucleus; C:cytoplasm; F:oxidoreductase activity; F:ion binding; P:cellular amino acid metabolic process; P:biosynthetic process	.
Tc02_g011450	0	F:hydrolase activity, acting on carbon-nitrogen (but not peptide) bonds; P:small molecule metabolic process; F:lyase activity; P:cellular nitrogen compound metabolic process; P:biosynthetic process; C:plastid	.	Tc02_g003540	0	C:nucleus; C:cytoplasm; P:cellular protein modification process; F:ligase activity	.	Tc06_g019210	0	F:transferase activity, transferring glycosyl groups	.	Tc04_g024360	2.26e-126	C:cellular_component	.
Tc02_g011550	0	C:cellular_component; P:transport; F:molecular_function	.	Tc02_g003650	0	F:iron ion binding; F:oxidoreductase activity, acting on paired donors, with incorporation or reduction of molecular oxygen; P:multicellular organism development; C:membrane; P:brassinosteroid biosynthetic process; P:oxidation-reduction process; F:monooxygenase activity; P:sterol metabolic process; P:brassinosteroid homeostasis; F:heme binding	.	Tc06_g019540	0	C:integral component of membrane; P:phosphorylation; F:kinase activity; F:polysaccharide binding	.	Tc04_g024390	4.14e-112	F:oxidoreductase activity	.
Tc02_g011600	0	F:transferase activity, transferring glycosyl groups; C:cellular_component	.	Tc02_g003740	0	F:transferase activity, transferring glycosyl groups; C:cellular_component	.	Tc06_g019670	0	P:embryo development; C:mitochondrion; C:cytosol; P:tRNA metabolic process; P:cellular amino acid metabolic process; C:plastid; F:ligase activity; P:reproduction; P:translation	.	Tc04_g024440	0	F:ATPase activity; C:nucleus; F:DNA binding; P:DNA metabolic process; P:Response to stress; P:Cell cycle; P:reproduction	.
Tc02_g011670	0	F:oxidoreductase activity; F:ion binding; C:cellular_component	.	Tc02_g004090	1.14e-87	P:biological_process	.	Tc06_g020100	0	F:peptidase activity; C:cellular_component	.	Tc04_g024780	0	F:DNA binding; F:ion binding; P:growth	.
Tc02_g011770	0	P:lipid metabolic process; F:molecular_function	.	Tc02_g004110	5e-82	P:auxin polar transport; P:regulation of organ growth; P:response to auxin	.	Tc06_g020450	0	F:ligase activity	.	Tc04_g024920	1.25e-150	P:carbohydrate metabolic process; F:transferase activity, transferring glycosyl groups; P:cell wall organization or biogenesis; P:biosynthetic process; C:cellular_component	.
Tc02_g011790	0	F:hydrolase activity, acting on ester bonds; P:metabolic process	.	Tc02_g004130	2.9e-90	P:auxin polar transport; P:regulation of organ growth; P:response to auxin	.	Tc06_g021210	0	F:ion binding	.	Tc04_g024930	0	P:carbohydrate metabolic process; F:transferase activity, transferring glycosyl groups; P:cell wall organization or biogenesis; P:biosynthetic process; C:cellular_component	.
Tc02_g011850	0	C:cellular_component	.	Tc02_g004150	0	C:integral component of membrane; F:amino acid transmembrane transporter activity; P:amino acid transmembrane transport	.	Tc07_g000010	4.6e-149	F:translation elongation factor activity; C:integral component of membrane; P:translational elongation	.	Tc04_g024990	5.6e-123	F:metal ion binding	.
Tc02_g012010	1.7e-84	F:organic cyclic compound binding; F:heterocyclic compound binding; F:oxidoreductase activity; P:cellular metabolic process; P:single-organism metabolic process; P:response to stimulus	.	Tc02_g004160	0	C:integral component of membrane; F:amino acid transmembrane transporter activity; P:amino acid transmembrane transport	.	Tc07_g000490	0	C:cell wall; F:peptidase activity	.	Tc04_g025230	0	F:oxidoreductase activity; F:ion binding	.
Tc02_g012020	0	F:oxidoreductase activity; P:catabolic process; C:cell wall; F:ion binding; P:cell wall organization or biogenesis; C:extracellular region; P:Response to stress	.	Tc02_g004170	3.5e-58	P:biological_process	.	Tc07_g000580	2.77e-161	C:cellular_component	.	Tc04_g025760	1.29e-167	F:nucleotide binding; F:nucleic acid binding	.
Tc02_g012250	0	F:oxidoreductase activity; P:protein complex assembly; C:cytoplasmic vesicle; C:cytoplasmic, membrane-bounded vesicle; F:lipid binding	.	Tc02_g004320	0	F:ion binding; P:cellular protein modification process; C:cytosol; F:kinase activity	.	Tc07_g000610	0	F:ATPase activity; F:ATP binding; F:microtubule motor activity; C:mitochondrion; C:kinesin complex; P:microtubule-based movement; P:aerobic respiration; P:seed germination; C:microtubule; F:microtubule binding	.	Tc04_g025820	0	F:ATPase activity; P:biological_process; C:cytoskeleton; C:cytoplasm; C:protein complex; F:cytoskeletal protein binding	.
Tc02_g012340	0	F:DNA binding; P:cellular protein modification process; F:kinase activity; C:plasma membrane	.	Tc02_g004330	0	P:transmembrane transport; C:cellular_component	.	Tc07_g001150	0	P:cellular protein modification process; C:cellular_component; F:kinase activity	.	Tc04_g025840	0	F:kinase activity	.
Tc02_g012380	1.37e-56	F:ion binding	.	Tc02_g004640	0	F:phosphatase activity; F:ion binding; P:cellular protein modification process; C:cellular_component	.	Tc07_g001160	0	P:anatomical structure development; P:reproduction	.	Tc04_g025860	0	F:transmembrane transporter activity; C:Golgi apparatus; C:plasma membrane	.
Tc02_g012400	0	F:transmembrane transporter activity; C:cellular_component	.	Tc02_g004660	0	F:phosphatase activity; F:ion binding; P:cellular protein modification process; C:cellular_component	.	Tc07_g001240	0	F:transferase activity, transferring acyl groups	.	Tc04_g026020	0	F:oxidoreductase activity	.
Tc02_g012430	0	F:transmembrane transporter activity; C:Golgi apparatus; C:plastid	.	Tc02_g004690	0	C:cellular_component	.	Tc07_g001500	0	P:carbohydrate metabolic process; P:catabolic process; C:cell wall; F:lyase activity; P:cell wall organization or biogenesis	.	Tc04_g026180	0	C:cytoplasm; F:oxidoreductase activity; P:lipid metabolic process; F:methyltransferase activity; P:biosynthetic process	.
Tc02_g012470	0	C:cellular_component; P:transport	.	Tc02_g004730	0	F:FAD binding; F:oxidoreductase activity; F:metal ion binding; C:photosystem II; C:integral component of membrane; P:photosynthesis; P:oxidation-reduction process	.	Tc07_g002090	0	F:ATP binding; F:microtubule motor activity; P:metabolic process; P:microtubule-based movement; C:microtubule; F:microtubule binding	.	Tc04_g026390	1.21e-156	C:intracellular; F:molecular_function	.
Tc02_g012480	0	C:nucleus; C:cytoplasm; P:signal transduction; F:ion binding; P:cellular protein modification process; F:kinase activity; C:plasma membrane	.	Tc02_g004800	0	P:chromosome organization; P:chromosome segregation; P:mitotic nuclear division; F:molecular_function	.	Tc07_g002530	0	P:protein folding; P:transport	.	Tc04_g026430	1.08e-166	C:nucleus; P:signal transduction; P:cellular nitrogen compound metabolic process; P:biosynthetic process	.
Tc02_g012530	0	C:extracellular space; P:catabolic process; F:peptidase activity; C:lysosome	.	Tc02_g004920	0	F:oxidoreductase activity	.	Tc07_g002810	0	F:RNA binding; F:nuclease activity	.	Tc04_g026620	1.3e-164	F:DNA binding	.
Tc02_g012590	4.2e-123	P:phosphorylation; F:kinase activity	.	Tc02_g004940	0	C:nucleus; F:ion binding; P:cellular protein modification process; P:Response to stress	.	Tc07_g003120	1.31e-133	C:plasma membrane	.	Tc04_g027120	7.3e-95	F:histidine phosphotransfer kinase activity; C:nucleus; C:cytoplasm; P:phosphorelay signal transduction system; P:phosphorylation; F:protein histidine kinase binding; P:cytokinin-activated signaling pathway	.
Tc02_g012630	0	P:signal transduction; F:molecular_function	.	Tc02_g004980	0	F:DNA binding; F:nucleic acid binding transcription factor activity; P:cellular nitrogen compound metabolic process; P:biosynthetic process	.	Tc07_g003160	5.76e-142	F:molecular_function	.	Tc04_g027320	0	P:Cell division; P:cellular component assembly; P:cellular protein modification process; P:anatomical structure formation involved in morphogenesis; F:cytoskeletal protein binding; C:cellular_component; F:kinase activity; P:Cell cycle	.
Tc02_g012640	0	P:small molecule metabolic process; F:oxidoreductase activity; P:cofactor metabolic process; P:lipid metabolic process; C:endoplasmic reticulum; P:cellular nitrogen compound metabolic process; P:biosynthetic process	.	Tc02_g005010	2.4e-101	F:ATP binding; P:metabolic process; F:ligase activity	.	Tc07_g003340	0	P:cellular protein modification process; C:cellular_component; F:kinase activity	.	Tc04_g027330	3.97e-61	C:cellular_component	.
Tc02_g012720	0	P:cellular protein modification process; C:cellular_component; F:kinase activity	.	Tc02_g005040	0	P:carbohydrate metabolic process; C:cell wall; C:vacuole; F:hydrolase activity, acting on glycosyl bonds	.	Tc07_g003870	0	F:molecular_function; P:Response to stress	.	Tc04_g027660	5.3e-69	C:cell; F:protein disulfide oxidoreductase activity; F:electron carrier activity; P:cell redox homeostasis; P:oxidation-reduction process	.
Tc02_g012830	0	F:nucleotide-sugar transmembrane transporter activity; P:UDP-glucose transport; C:integral component of membrane; P:carbohydrate transport; C:endoplasmic reticulum-Golgi intermediate compartment; P:purine nucleotide-sugar transmembrane transport	.	Tc02_g005060	0	F:lipid binding; C:cellular_component	.	Tc07_g003890	0	P:Response to stress; F:hydrolase activity, acting on glycosyl bonds; P:translation	.	Tc04_g027670	0	C:cytosol	.
Tc02_g013030	6.2e-57	P:protein targeting to mitochondrion; C:peroxisome; P:protein targeting to peroxisome; C:mitochondrion	.	Tc02_g005100	0	C:integral component of membrane; F:amino acid transmembrane transporter activity; C:plasma membrane; P:amino acid transmembrane transport	.	Tc07_g003910	6.17e-31	P:Response to stress; F:hydrolase activity, acting on glycosyl bonds; P:translation	.	Tc04_g027710	0	P:cellular protein modification process; C:cellular_component; F:kinase activity	.
Tc02_g013330	0	C:cellular_component; F:molecular_function	.	Tc02_g005170	0	C:integral component of membrane	.	Tc07_g003940	0	P:Response to stress; F:hydrolase activity, acting on glycosyl bonds; P:translation	.	Tc04_g027720	0	P:embryo development; P:membrane organization; F:GTPase activity; F:ion binding; P:ribosome biogenesis; P:cellular nitrogen compound metabolic process; C:plastid; P:reproduction	.
Tc02_g013720	7.3e-83	C:integral component of plasma membrane; P:proton transport; F:oxidoreductase activity; F:sugar:proton symporter activity; P:glucose import; F:glucose transmembrane transporter activity; P:glucose transmembrane transport	.	Tc02_g005240	0	C:nucleus; P:cytoskeleton organization; C:cytoplasm; P:cell morphogenesis; P:Cell differentiation; P:reproduction; P:growth	.	Tc07_g003970	3.88e-151	P:Response to stress; F:hydrolase activity, acting on glycosyl bonds; P:translation	.	Tc04_g028240	0	P:meiotic chromosome condensation; P:mitotic chromosome condensation; F:histone binding; C:condensed chromosome, centromeric region; C:nuclear condensin complex; F:chromatin binding; P:chromosome separation	.
Tc02_g013740	0	C:cellular_component	.	Tc02_g005370	3.4e-126	F:guiding stereospecific synthesis activity; P:regulation of catalytic activity; P:phenylpropanoid biosynthetic process	.	Tc07_g004650	0	F:molecular_function	.	Tc04_g028370	0	P:DNA metabolic process; C:cellular_component; P:Response to stress	.
Tc02_g013750	0	C:integral component of membrane	.	Tc02_g005470	6.84e-170	F:translation factor activity, RNA binding	.	Tc07_g004790	0	P:small molecule metabolic process; P:sulfur compound metabolic process; F:oxidoreductase activity; F:ion binding; C:cytosol; P:cellular nitrogen compound metabolic process; P:biosynthetic process; C:plastid; P:Response to stress	.	Tc04_g028980	0	P:cellular nitrogen compound metabolic process; F:molecular_function	.
Tc02_g013910	0	C:cellular_component	.	Tc02_g005640	0	P:secondary metabolic process; F:transferase activity, transferring acyl groups; P:cellular component assembly; P:extracellular matrix organization; P:anatomical structure formation involved in morphogenesis; C:endoplasmic reticulum; P:biosynthetic process	.	Tc07_g004950	0	F:nucleotide binding; F:ATPase activity; F:ATP binding; F:ATPase activity, coupled to transmembrane movement of substances; P:transmembrane transport; C:membrane; C:integral component of membrane; P:transport	.	Tc04_g029090	0	F:ligase activity	.
Tc02_g014230	0	F:ion binding; C:intracellular	.	Tc02_g005690	1.5e-179	C:integral component of membrane; P:transport; F:transporter activity	.	Tc07_g005000	2.44e-144	C:plastid	.	Tc04_g029310	0	F:methyltransferase activity; F:transferase activity; P:methylation	.
Tc02_g014550	6.5e-49	F:calcium ion binding	.	Tc02_g005820	2.36e-64	P:biological_process	.	Tc07_g005140	0	C:plastid	.	Tc04_g029500	0	F:RNA binding; P:mRNA processing; C:vacuole; C:plastid; P:translation	.
Tc02_g014690	4.1e-170	F:DNA binding	.	Tc02_g005850	4.6e-52	P:response to auxin	.	Tc07_g005160	3.23e-80	P:small molecule metabolic process; F:oxidoreductase activity; P:homeostatic process; C:cytosol; P:protein folding; F:isomerase activity	.	Tc04_g029770	2.7e-124	C:cellular_component	.
Tc02_g014970	0	F:transferase activity, transferring acyl groups other than amino-acyl groups; P:metabolic process	.	Tc02_g005880	2.9e-68	P:response to auxin	.	Tc07_g005240	0	F:oxidoreductase activity	.	Tc04_g029870	8.6e-94	P:negative regulation of catalytic activity; F:enzyme inhibitor activity	.
Tc02_g014980	0	P:signal transduction; F:kinase activity	.	Tc02_g005950	1.33e-61	P:biological_process	.	Tc07_g005250	1.02e-130	F:structural constituent of ribosome; C:mitochondrion; C:ribosome; C:plastid; P:translation	.	Tc04_g030250	0	F:transmembrane transporter activity; C:cellular_component	.
Tc02_g014991	1.97e-62	F:molecular_function	.	Tc02_g005970	8.6e-62	P:response to auxin	.	Tc07_g005820	0	P:Response to stress; F:hydrolase activity, acting on glycosyl bonds; P:translation	.	Tc04_g030350	0	C:cellular_component; F:kinase activity	.
Tc02_g015360	0	P:cellular protein modification process; F:kinase activity	.	Tc02_g005990	8.7e-59	P:response to auxin	.	Tc07_g005860	0	P:Response to stress; F:hydrolase activity, acting on glycosyl bonds; P:translation	.	Tc04_g030360	0	P:Cell division; F:cytoskeletal protein binding; P:Cell cycle	.
Tc02_g015610	3.73e-178	P:catabolic process; F:ion binding; P:cellular protein modification process; C:endoplasmic reticulum; P:transport; F:ligase activity	.	Tc02_g006330	0	P:catabolic process; F:lyase activity; P:cellular amino acid metabolic process; P:cellular nitrogen compound metabolic process; P:biosynthetic process	.	Tc07_g006100	0	C:cellular_component	.	Tc04_g030490	0	P:embryo development; F:rRNA binding; C:plastid; P:reproduction	.
Tc02_g015660	4.15e-53	F:peptidase activity	.	Tc02_g006390	9.82e-156	F:ion binding; C:intracellular	.	Tc07_g006280	0	F:transmembrane transporter activity; C:cell wall; P:anatomical structure development; P:Cell differentiation; C:Golgi apparatus; C:plasma membrane	.	Tc04_g030520	2.07e-86	P:cellular protein modification process; C:cellular_component; F:kinase activity	.
Tc02_g015720	3.33e-99	F:ion binding	.	Tc02_g006450	1.12e-156	C:mitochondrion; F:ion binding; C:vacuole	.	Tc07_g006620	0	F:oxidoreductase activity; C:plastid; C:thylakoid	.	Tc04_g030660	0	F:RNA binding; P:tRNA metabolic process; F:isomerase activity	.
Tc02_g015790	0	F:transmembrane transporter activity; C:plasma membrane	.	Tc02_g006800	0	F:oxidoreductase activity; F:ion binding; C:cellular_component	.	Tc07_g006640	2.6e-132	C:cellular_component	.	Tc05_g000020	0	C:cellular_component	.
Tc02_g015970	0	C:cellular_component	.	Tc02_g006850	1.46e-113	C:cytoplasm; C:plasma membrane; F:molecular_function; P:Response to stress	.	Tc07_g007170	0	C:cytoskeleton; C:protein complex; F:cytoskeletal protein binding	.	Tc05_g000260	0	F:ion binding; C:plastid; F:ligase activity	.
Tc02_g016130	9.1e-101	C:cell; F:protein disulfide oxidoreductase activity; F:electron carrier activity; P:salicylic acid mediated signaling pathway; P:cell redox homeostasis; P:oxidation-reduction process; P:jasmonic acid mediated signaling pathway	.	Tc02_g006950	0	P:small molecule metabolic process; F:transferase activity, transferring acyl groups; P:lipid metabolic process; P:biosynthetic process; C:cellular_component	.	Tc07_g007180	0	P:generation of precursor metabolites and energy; F:structural molecule activity; F:ion binding; P:cellular protein modification process; P:photosynthesis; C:protein complex; C:plastid; C:thylakoid	.	Tc05_g001560	0	C:cellular_component; P:transport	.
Tc02_g016160	2.34e-125	P:proteolysis; F:aminopeptidase activity	.	Tc02_g006960	1.8e-65	C:nucleus; F:DNA binding	.	Tc07_g007220	5.89e-62	P:biological_process; C:cytoskeleton; C:cilium; C:protein complex	.	Tc05_g001650	1.07e-55	F:transmembrane transporter activity; C:cellular_component	.
Tc02_g016310	4.84e-151	F:DNA binding	.	Tc02_g006980	0	P:cellular protein modification process; C:cellular_component; F:kinase activity	.	Tc07_g007340	0	F:DNA binding	.	Tc05_g001680	0	P:DNA metabolic process; P:Response to stress	.
Tc02_g016590	0	F:phosphatase activity; P:cellular protein modification process	.	Tc02_g007040	5.75e-136	C:nucleus; F:molecular_function	.	Tc07_g008230	0	P:drug transmembrane transport; F:antiporter activity; C:integral component of membrane; F:drug transmembrane transporter activity	.	Tc05_g001790	0	C:nucleus; P:protein targeting; P:transmembrane transport; F:protein transporter activity; F:methyltransferase activity; C:plastid	.
Tc02_g016660	1.83e-106	C:nucleus; F:DNA binding; F:nucleic acid binding transcription factor activity; P:cellular nitrogen compound metabolic process; P:biosynthetic process	.	Tc02_g007290	2.45e-168	C:nucleus; F:DNA binding; F:nucleic acid binding transcription factor activity; F:ion binding; P:Cell differentiation; C:protein complex; F:transcription factor binding; P:cellular nitrogen compound metabolic process; P:biosynthetic process	.	Tc07_g008400	6.4e-66	P:metabolic process; F:transferase activity; F:molecular_function	.	Tc05_g002170	0	P:cofactor metabolic process; P:cellular nitrogen compound metabolic process; P:biosynthetic process; C:cellular_component; F:transferase activity, transferring alkyl or aryl (other than methyl) groups	.
Tc02_g017580	0	P:small molecule metabolic process; P:lipid metabolic process; P:biosynthetic process; F:molecular_function	.	Tc02_g007320	0	P:lipid metabolic process; P:biosynthetic process; C:cellular_component; F:transferase activity, transferring alkyl or aryl (other than methyl) groups	.	Tc07_g008850	3.23e-165	C:cellular_component	.	Tc05_g002240	0	C:cell; F:oxidoreductase activity; P:homeostatic process	.
Tc02_g017890	0	C:cytoplasm; C:plasma membrane	.	Tc02_g007330	2.96e-144	P:lipid metabolic process; P:biosynthetic process; C:cellular_component; F:transferase activity, transferring alkyl or aryl (other than methyl) groups	.	Tc07_g009201	0	P:biological_process; F:molecular_function	.	Tc05_g002600	0	P:generation of precursor metabolites and energy; F:ion binding; P:cellular protein modification process; P:photosynthesis; C:protein complex; C:plastid; C:thylakoid	.
Tc02_g018120	0	P:embryo development; P:developmental maturation; P:reproduction	.	Tc02_g007410	0	F:nucleotide binding; F:nucleic acid binding	.	Tc07_g009270	0	P:metabolic process; F:transferase activity	.	Tc05_g002760	0	F:transferase activity, transferring glycosyl groups; C:cellular_component	.
Tc02_g018430	6.07e-09	C:cellular_component	.	Tc02_g007650	0	F:ATP binding; P:peptidyl-tyrosine phosphorylation; F:non-membrane spanning protein tyrosine kinase activity; C:integral component of membrane; F:protein serine/threonine kinase activity	.	Tc07_g010110	0	C:cellular_component; F:kinase activity	.	Tc05_g002810	0	C:integral component of membrane; P:transport; F:transporter activity	.
Tc02_g018760	2.2e-82	F:organic cyclic compound binding; F:heterocyclic compound binding	.	Tc02_g007920	0	C:cellular_component	.	Tc07_g010780	0	F:transferase activity, transferring acyl groups; C:Golgi apparatus; P:cell wall organization or biogenesis	.	Tc05_g002890	0	C:nucleus; F:DNA binding; P:cellular nitrogen compound metabolic process; P:biosynthetic process	.
Tc02_g018920	0	F:nuclease activity	.	Tc02_g008030	1.43e-79	C:nucleus; F:DNA binding; P:cellular nitrogen compound metabolic process; P:biosynthetic process	.	Tc07_g011150	1.4e-132	P:multicellular organism development	.	Tc05_g003180	0	C:nucleus; P:cellular nitrogen compound metabolic process; P:biosynthetic process; F:kinase activity; C:plastid	.
Tc02_g018960	0	P:ion transport; C:integral component of membrane; P:ionotropic glutamate receptor signaling pathway; F:ionotropic glutamate receptor activity	.	Tc02_g008040	3.21e-92	C:nucleus; F:DNA binding; P:cellular nitrogen compound metabolic process; P:biosynthetic process	.	Tc07_g011250	0	C:cellular_component	.	Tc05_g003200	1.97e-143	C:nucleus; P:cellular nitrogen compound metabolic process; P:biosynthetic process; F:kinase activity; C:plastid	.
Tc02_g019970	3.4e-127	C:nucleus; F:protein homodimerization activity; F:transcription corepressor activity; P:response to wounding; P:response to jasmonic acid; P:regulation of jasmonic acid mediated signaling pathway; P:regulation of defense response; P:negative regulation of nucleic acid-templated transcription	.	Tc02_g008060	1.16e-71	C:nucleus; F:DNA binding; P:cellular nitrogen compound metabolic process; P:biosynthetic process	.	Tc07_g011460	0	F:ATP binding; C:integral component of membrane; F:protein serine/threonine kinase activity; P:protein phosphorylation	.	Tc05_g003210	0	P:biological_process; C:cytoskeleton; C:cytoplasm; F:GTPase activity; F:structural molecule activity	.
Tc02_g020311	0	F:ion binding; F:peptidase activity; P:DNA metabolic process	.	Tc02_g008090	3.1e-80	C:nucleus; F:DNA binding; P:transcription, DNA-templated; P:regulation of transcription, DNA-templated	.	Tc07_g011740	5.86e-09	F:molecular_function	.	Tc05_g003280	0	P:secondary metabolic process; F:oxidoreductase activity; P:catabolic process; F:ion binding; C:extracellular region	.
Tc02_g020430	0	F:binding	.	Tc02_g008210	1.38e-146	P:embryo development; C:plastid; P:reproduction	.	Tc07_g011840	7.9e-64	F:protein histidine kinase activity; F:hydrolase activity; P:peptidyl-histidine phosphorylation	.	Tc05_g003460	2.92e-107	F:transmembrane transporter activity; C:cellular_component	.
Tc02_g020450	5.5e-169	F:ATP binding; C:integral component of membrane; F:protein serine/threonine kinase activity; P:protein phosphorylation; F:polysaccharide binding	.	Tc02_g008280	0	F:hydrolase activity	.	Tc07_g012090	0	P:carbohydrate metabolic process; F:transferase activity, transferring glycosyl groups; C:protein complex; P:biosynthetic process; C:plasma membrane	.	Tc05_g003570	0	P:biological_process; C:cytosol; C:plasma membrane; F:molecular_function	.
Tc02_g020590	0	F:transferase activity, transferring glycosyl groups; C:cellular_component	.	Tc02_g008450	1.82e-123	F:molecular_function	.	Tc07_g014380	1.82e-83	P:photosynthesis; C:protein complex; C:thylakoid	.	Tc05_g003630	9.78e-158	P:embryo development; F:transmembrane transporter activity; C:cellular_component; P:reproduction	.
Tc02_g020850	3.3e-28	F:nucleic acid binding; F:zinc ion binding	.	Tc02_g008460	4.2e-124	F:electron carrier activity; C:membrane	.	Tc07_g015060	6e-128	C:plasmodesma; C:integral component of membrane	.	Tc05_g003840	0	C:cytoplasm; F:oxidoreductase activity; P:cellular amino acid metabolic process; P:biosynthetic process; F:kinase activity	.
Tc02_g022200	0	F:ligase activity	.	Tc02_g008530	0	C:plasma membrane	.	Tc07_g015080	0	F:transmembrane transporter activity; C:cellular_component	.	Tc05_g004440	0	F:DNA binding	.
Tc02_g022530	0	F:transferase activity, transferring glycosyl groups; P:cellular protein modification process; C:Golgi apparatus; P:biosynthetic process	.	Tc02_g008580	0	F:molecular_function	.	Tc07_g016680	0	P:cellular protein modification process; F:kinase activity; C:plasma membrane; P:reproduction	.	Tc05_g004480	0	C:cell wall; P:cell wall organization or biogenesis; C:extracellular region	.
Tc02_g022670	0	F:ATPase activity; P:membrane organization; C:endosome; P:vesicle-mediated transport; F:ion binding; P:anatomical structure development; C:Golgi apparatus; C:plasma membrane	.	Tc02_g008590	0	C:cellular_component; F:molecular_function	.	Tc07_g016830	0	F:ion binding; F:methyltransferase activity	.	Tc05_g004570	0	F:ATPase activity; P:biological_process; C:cytoskeleton; C:protein complex; F:cytoskeletal protein binding; C:plastid	.
Tc02_g022740	0	C:cellular_component	.	Tc02_g008600	0	P:DNA metabolic process; F:molecular_function; P:Response to stress	.	Tc07_g016890	0	F:transmembrane transporter activity; P:homeostatic process; C:cellular_component	.	Tc05_g004730	2.22e-173	C:nucleus; F:DNA binding; P:cellular nitrogen compound metabolic process; P:biosynthetic process	.
Tc02_g022750	1.6e-111	C:cellular_component	.	Tc02_g008660	1.9e-136	C:cellular_component	.	Tc07_g017490	0	P:catabolic process; F:peptidase activity	.	Tc05_g005090	0	F:transmembrane transporter activity; C:cellular_component	.
Tc02_g022850	2.5e-169	F:metal ion binding; P:regulation of timing of transition from vegetative to reproductive phase; F:transcription regulatory region DNA binding; P:gibberellic acid mediated signaling pathway; P:cytokinin-activated signaling pathway; P:trichome differentiation	.	Tc02_g008730	0	P:phosphorylation; F:kinase activity	.	Tc08_g000120	0	F:ion binding	.	Tc05_g005250	1.91e-55	F:lyase activity	.
Tc02_g022980	0	P:small molecule metabolic process; P:secondary metabolic process; F:transferase activity, transferring glycosyl groups; P:sulfur compound metabolic process; P:cell wall organization or biogenesis; P:biosynthetic process; P:Response to stress	.	Tc02_g008760	0	P:small molecule metabolic process; F:transferase activity, transferring acyl groups; P:lipid metabolic process; C:endoplasmic reticulum; C:Golgi apparatus; P:biosynthetic process; C:plasma membrane	.	Tc08_g000140	5e-149	C:nucleus; F:DNA binding	.	Tc05_g005270	0	F:translation factor activity, RNA binding	.
Tc02_g023361	0	F:nucleic acid binding; F:zinc ion binding; P:DNA integration; P:oxidation-reduction process	.	Tc02_g008790	0	C:chloroplast stroma; F:metal ion binding; C:mitochondrion; C:membrane; C:apoplast; P:oxidation-reduction process; F:4 iron, 4 sulfur cluster binding; F:heme binding; F:ferredoxin-nitrite reductase activity; P:nitrate assimilation	.	Tc08_g000220	0	P:cellular protein modification process; C:cellular_component; F:kinase activity	.	Tc05_g005540	0	F:transmembrane transporter activity; C:organelle; C:plasma membrane	.
Tc02_g023580	0	P:RNA phosphodiester bond hydrolysis, endonucleolytic; F:nucleic acid binding; F:RNA-DNA hybrid ribonuclease activity	.	Tc02_g008800	0	F:transferase activity, transferring glycosyl groups; P:cellular protein modification process; C:Golgi apparatus; P:biosynthetic process	.	Tc08_g000230	0	C:cell wall; F:peptidase activity	.	Tc05_g005740	2.49e-180	F:oxidoreductase activity; C:plastid	.
Tc02_g023720	2.31e-161	P:biological_process	.	Tc02_g008810	0	F:ligase activity	.	Tc08_g000270	0	F:peptidase activity; C:cellular_component	.	Tc05_g005890	0	F:DNA binding; F:helicase activity; P:biosynthetic process; P:DNA metabolic process	.
Tc02_g023730	0	P:metabolic process; F:NAD+ ADP-ribosyltransferase activity	.	Tc02_g008820	5.8e-89	C:nucleus	.	Tc08_g000410	0	F:transmembrane transporter activity; C:cellular_component; F:signal transducer activity	.	Tc05_g006110	0	P:cellular protein modification process; C:cellular_component; F:kinase activity	.
Tc02_g023830	0	P:small molecule metabolic process; P:cofactor metabolic process; P:cellular nitrogen compound metabolic process; P:biosynthetic process; F:kinase activity	.	Tc02_g009090	5.39e-169	P:homeostatic process; C:plastid	.	Tc08_g000490	0	P:carbohydrate metabolic process; F:ion binding; C:cellular_component; F:hydrolase activity, acting on glycosyl bonds	.	Tc05_g006140	0	C:plasma membrane; F:molecular_function; P:Response to stress	.
Tc02_g024080	0	F:lyase activity; F:ligase activity	.	Tc02_g009230	3.7e-39	P:flavonoid glucuronidation; F:quercetin 3-O-glucosyltransferase activity; C:intracellular membrane-bounded organelle; F:quercetin 7-O-glucosyltransferase activity; P:flavonoid biosynthetic process	.	Tc08_g000700	1.21e-171	P:lipid metabolic process; C:cytosol; P:biosynthetic process; F:kinase activity; C:plasma membrane	.	Tc05_g006310	0	F:transferase activity, transferring acyl groups; C:cellular_component	.
Tc02_g024090	0	C:membrane	.	Tc02_g009240	1.2e-64	P:flavonoid glucuronidation; F:quercetin 3-O-glucosyltransferase activity; C:intracellular membrane-bounded organelle; F:quercetin 7-O-glucosyltransferase activity; P:flavonoid biosynthetic process	.	Tc08_g001300	0	P:secondary metabolic process; F:oxidoreductase activity; F:ion binding; P:biosynthetic process; C:cellular_component	.	Tc05_g006380	0	C:cellular_component; P:transport; F:molecular_function	.
Tc02_g024240	0	P:cellular protein modification process; F:kinase activity; C:plasma membrane; P:Response to stress	.	Tc02_g009260	0	C:extracellular space; F:2-alkenal reductase [NAD(P)] activity; F:cysteine-type endopeptidase activity; P:oxidation-reduction process; P:proteolysis involved in cellular protein catabolic process; C:lysosome	.	Tc08_g001670	2.2e-179	C:integral component of membrane	.	Tc05_g007070	0	F:ATPase activity; F:transmembrane transporter activity; P:signal transduction; P:pigmentation; P:anatomical structure development; C:plasma membrane; P:reproduction	.
Tc02_g024410	0	C:cellular_component; F:molecular_function	.	Tc02_g009280	6e-95	C:plasmodesma; F:calcium ion binding; C:cytosol; C:plasma membrane; F:calcium-dependent phospholipid binding	.	Tc08_g001980	0	P:carbohydrate metabolic process; C:plasma membrane; F:hydrolase activity, acting on glycosyl bonds	.	Tc05_g007170	0	P:carbohydrate metabolic process; F:transferase activity, transferring glycosyl groups; P:catabolic process; C:cell wall; P:cell wall organization or biogenesis; C:extracellular region; F:hydrolase activity, acting on glycosyl bonds	.
Tc02_g024510	4.5e-63	P:RNA phosphodiester bond hydrolysis, endonucleolytic; F:nucleic acid binding; F:RNA-DNA hybrid ribonuclease activity; F:RNA-directed DNA polymerase activity; P:metabolic process; P:RNA-dependent DNA biosynthetic process; F:transferase activity	.	Tc02_g009470	6.37e-156	F:DNA binding	.	Tc08_g002550	0	C:nucleus; F:DNA binding; F:nucleic acid binding transcription factor activity; P:cellular nitrogen compound metabolic process; P:biosynthetic process	.	Tc05_g007220	0	F:transferase activity, transferring acyl groups; C:cellular_component	.
Tc02_g024531	1.64e-72	F:molecular_function	.	Tc02_g009620	0	P:methionine biosynthetic process; F:S-methyl-5-thioribose kinase activity; P:phosphorylation	.	Tc08_g002770	0	P:carbohydrate metabolic process; C:cell wall; C:vacuole; F:hydrolase activity, acting on glycosyl bonds	.	Tc05_g007240	0	P:cellular protein modification process; F:kinase activity; C:plasma membrane; P:reproduction	.
Tc02_g024780	0	C:cellular_component	.	Tc02_g009890	0	F:molecular_function	.	Tc08_g003040	0	P:biological_process; C:plastid; F:molecular_function	.	Tc05_g007730	7.73e-168	P:cellular protein modification process; C:endoplasmic reticulum; P:protein folding; C:plastid; C:thylakoid; F:isomerase activity	.
Tc02_g024950	0	F:transferase activity, transferring glycosyl groups; P:cellular protein modification process; P:biosynthetic process; C:cellular_component	.	Tc02_g009910	0	F:phosphatase activity; F:ion binding; P:cellular protein modification process	.	Tc08_g003190	1.23e-141	F:oxidoreductase activity; F:ion binding; C:cellular_component	.	Tc05_g008010	0	P:cellular protein modification process; F:kinase activity; C:plasma membrane	.
Tc02_g025140	1.59e-120	P:sulfur compound metabolic process; F:enzyme regulator activity; C:plastid	.	Tc02_g009930	1.2e-75	P:Response to stress	.	Tc08_g003220	7.03e-86	F:oxidoreductase activity; F:ion binding; C:cellular_component	.	Tc05_g008170	0	F:DNA binding	.
Tc02_g025190	0	F:phosphatase activity; P:cellular protein modification process; F:cytoskeletal protein binding; F:kinase activity	.	Tc02_g010000	2.05e-178	F:oxidoreductase activity; C:cellular_component	.	Tc08_g003440	0	P:carbohydrate metabolic process; P:catabolic process; C:cellular_component; F:hydrolase activity, acting on glycosyl bonds	.	Tc05_g008180	0	F:phosphatase activity	.
Tc02_g025230	0	C:cellular_component	.	Tc02_g010120	1.5e-143	F:DNA binding; F:metal ion binding	.	Tc08_g003460	2.18e-96	P:generation of precursor metabolites and energy; F:unfolded protein binding; P:photosynthesis; P:protein folding; C:plastid; C:thylakoid; F:isomerase activity	.	Tc05_g008200	0	P:biological_process; F:transferase activity, transferring glycosyl groups; C:cellular_component	.
Tc02_g025310	0	F:ion binding; F:ligase activity	.	Tc02_g010200	2.1e-55	P:polysaccharide catabolic process; C:cell wall; F:hydrolase activity, hydrolyzing O-glycosyl compounds; P:single-organism process; P:cellular process	.	Tc08_g003500	0	F:transferase activity, transferring glycosyl groups; F:ion binding; F:methyltransferase activity; C:cellular_component	.	Tc05_g009200	0	C:cell; F:oxidoreductase activity; P:homeostatic process	.
Tc02_g025470	0	F:kinase activity; C:plasma membrane	.	Tc02_g010210	0	C:nucleus; P:response to salt stress; C:cytoplasm	.	Tc08_g003790	0	P:biological_process; C:cytoskeleton; F:cytoskeletal protein binding	.	Tc05_g009380	0	F:ATPase activity; P:biological_process; C:cytoskeleton; C:protein complex; F:cytoskeletal protein binding	.
Tc02_g026070	0	C:nucleus; C:cytoplasm; P:metabolic process; F:hydrolase activity	.	Tc02_g010380	0	P:cellular protein modification process; C:extracellular region; F:kinase activity	.	Tc08_g004250	0	P:small molecule metabolic process; P:sulfur compound metabolic process; F:oxidoreductase activity; P:homeostatic process; P:protein folding; C:plastid; P:Response to stress	.	Tc05_g009630	2.26e-131	C:plastid; C:thylakoid	.
Tc02_g026080	0	F:transferase activity, transferring acyl groups	.	Tc02_g010410	0	P:cellular protein modification process; C:cellular_component; F:kinase activity	.	Tc08_g004710	0	F:ATPase activity; P:membrane organization; P:generation of precursor metabolites and energy; P:catabolic process; C:mitochondrion; P:photosynthesis; F:peptidase activity; C:plastid; C:thylakoid	.	Tc05_g011120	6.37e-175	C:plastid; F:molecular_function; C:thylakoid	.
Tc02_g026090	0	F:transferase activity, transferring acyl groups other than amino-acyl groups; P:metabolic process	.	Tc02_g010420	0	F:ATP binding; C:integral component of membrane; F:protein serine/threonine kinase activity; F:carbohydrate binding; P:protein phosphorylation	.	Tc08_g004940	0	P:carbohydrate metabolic process; F:transferase activity, transferring glycosyl groups; P:generation of precursor metabolites and energy; F:ion binding; P:biosynthetic process; F:hydrolase activity, acting on glycosyl bonds	.	Tc05_g011460	1.02e-133	C:nucleus; F:lyase activity; C:cytosol; P:biosynthetic process; F:hydrolase activity, acting on glycosyl bonds	.
Tc02_g026150	3.07e-160	F:transferase activity, transferring acyl groups other than amino-acyl groups; F:transferase activity	.	Tc02_g010490	0	P:flavonoid glucuronidation; F:quercetin 3-O-glucosyltransferase activity; C:intracellular membrane-bounded organelle; F:quercetin 7-O-glucosyltransferase activity; P:flavonoid biosynthetic process	.	Tc08_g004970	0	C:nucleus	.	Tc05_g012820	0	F:ATPase activity; F:transmembrane transporter activity; C:plasma membrane	.
Tc02_g026330	0	P:signal transduction; P:cellular protein modification process; C:protein complex; F:enzyme regulator activity; C:intracellular	.	Tc02_g010510	0	F:transferase activity, transferring glycosyl groups; C:Golgi apparatus	.	Tc08_g005240	0	P:carbohydrate metabolic process; F:glucan endo-1,3-beta-D-glucosidase activity; C:anchored component of plasma membrane; F:polysaccharide binding	.	Tc05_g012850	5.6e-137	C:integral component of membrane	.
Tc02_g026400	0	F:ATPase activity; F:transmembrane transporter activity; C:cellular_component	.	Tc02_g010550	0	F:transferase activity, transferring glycosyl groups; C:Golgi apparatus	.	Tc08_g005260	0	P:small molecule metabolic process; P:carbohydrate metabolic process; F:oxidoreductase activity	.	Tc05_g013200	0	F:ion binding	.
Tc02_g026410	1.3e-59	C:integral component of membrane	.	Tc02_g010830	0	C:mitochondrial membrane; F:structural constituent of ribosome; P:mitochondrial transport; C:integral component of membrane; P:translation	.	Tc08_g005780	0	F:DNA binding; F:aspartic-type endopeptidase activity; P:protein catabolic process; P:proteolysis	.	Tc05_g013280	0	F:peptidase activity	.
Tc02_g026420	0	F:NADP binding; F:NAD binding; P:oxidation-reduction process; P:glucose metabolic process; F:oxidoreductase activity, acting on the aldehyde or oxo group of donors, NAD or NADP as acceptor	.	Tc02_g010870	0	C:nucleus; F:DNA binding	.	Tc08_g006470	0	F:molecular_function	.	Tc05_g013840	0	P:biological_process; C:cytoskeleton; C:cytoplasm; F:GTPase activity; F:structural molecule activity	.
Tc02_g026520	6.5e-113	F:oxidoreductase activity; C:plastid	.	Tc02_g011000	0	C:cellular_component	.	Tc08_g006540	0	F:molecular_function; P:Response to stress	.	Tc05_g013900	0	C:nucleus	.
Tc02_g026690	0	C:membrane; C:integral component of membrane	.	Tc02_g011001	1.2e-53	F:binding; P:nucleobase-containing compound metabolic process	.	Tc08_g006640	0	P:cellular protein modification process; P:anatomical structure development; C:cellular_component; F:kinase activity; P:transport	.	Tc05_g014000	1.47e-168	F:ion binding; P:photosynthesis; C:protein complex; C:thylakoid	.
Tc02_g026850	7.2e-123	F:zinc ion binding; C:integral component of membrane	.	Tc02_g011010	1.9e-39	F:nucleic acid binding; P:nucleic acid phosphodiester bond hydrolysis; F:exonuclease activity; C:mitochondrion; P:DNA integration	.	Tc08_g006850	7.72e-26	F:molecular_function	.	Tc05_g014180	0	F:oxidoreductase activity	.
Tc02_g026880	2.86e-174	P:small molecule metabolic process; P:cofactor metabolic process; P:cellular nitrogen compound metabolic process; F:isomerase activity	.	Tc02_g011020	1.44e-39	C:cellular_component	.	Tc08_g007020	0	C:nucleus; F:DNA binding; F:transcription factor activity, sequence-specific DNA binding; P:transcription, DNA-templated; P:multicellular organism development; P:regulation of transcription, DNA-templated	.	Tc05_g014680	0	C:vacuole	.
Tc02_g026900	4.24e-94	C:cellular_component	.	Tc02_g011112	2.8e-170	F:nucleotide binding; P:RNA phosphodiester bond hydrolysis, endonucleolytic; F:nucleic acid binding; F:RNA-DNA hybrid ribonuclease activity	.	Tc08_g007110	0	F:ATPase activity; F:ATP binding; F:microtubule motor activity; P:metabolic process; C:kinesin complex; P:microtubule-based movement; C:microtubule; F:microtubule binding	.	Tc05_g015240	0	F:RNA binding; F:structural constituent of ribosome; C:cell wall; F:lyase activity; C:endoplasmic reticulum; C:ribosome; C:plasma membrane; P:translation	.
Tc02_g026910	1.66e-94	C:cellular_component	.	Tc02_g011114	6e-95	F:nucleic acid binding; F:zinc ion binding; F:ubiquitin-protein transferase activator activity; F:anaphase-promoting complex binding; P:nucleobase-containing compound metabolic process	.	Tc08_g007190	0	F:transferase activity, transferring acyl groups; P:lipid metabolic process	.	Tc05_g016360	0	P:cellular protein modification process; F:kinase activity; C:plasma membrane	.
Tc02_g026930	0	F:transferase activity, transferring glycosyl groups; C:cellular_component	.	Tc02_g011120	7.8e-52	C:integral component of membrane	.	Tc08_g007300	1.58e-113	P:cytokinin metabolic process; C:cytoplasm; C:plasma membrane	.	Tc05_g016790	0	F:methyltransferase activity; C:ribosome	.
Tc02_g027260	0	P:cellular protein modification process; F:signal transducer activity; F:kinase activity; C:intracellular	.	Tc02_g011170	0	P:small molecule metabolic process; F:transferase activity, transferring glycosyl groups; P:biosynthetic process; C:organelle; C:intracellular	.	Tc08_g007390	4.49e-142	F:ion binding	.	Tc05_g017210	0	P:biological_process; C:cytoskeleton; F:cytoskeletal protein binding	.
Tc02_g027300	2.7e-141	C:nucleus; F:transcription factor activity, sequence-specific DNA binding; P:transcription, DNA-templated; P:regulation of transcription, DNA-templated; F:sequence-specific DNA binding	.	Tc02_g011450	0	F:hydrolase activity, acting on carbon-nitrogen (but not peptide) bonds; P:small molecule metabolic process; F:lyase activity; P:cellular nitrogen compound metabolic process; P:biosynthetic process; C:plastid	.	Tc08_g007740	0	C:cell wall; F:peptidase activity	.	Tc05_g017390	0	C:cellular_component; P:transport	.
Tc02_g027470	2.3e-45	P:RNA phosphodiester bond hydrolysis, endonucleolytic; F:nucleic acid binding; F:RNA-DNA hybrid ribonuclease activity	.	Tc02_g011670	0	F:oxidoreductase activity; F:ion binding; C:cellular_component	.	Tc08_g007840	0	P:secondary metabolic process; P:sulfur compound metabolic process; F:oxidoreductase activity; F:ion binding; P:cellular nitrogen compound metabolic process; P:biosynthetic process; C:cellular_component; P:Response to stress	.	Tc05_g017440	0	P:DNA-templated transcription, termination	.
Tc02_g027571	2.68e-95	P:biological_process; F:molecular_function	.	Tc02_g011770	0	P:lipid metabolic process; F:molecular_function	.	Tc08_g007970	0	C:nucleus	.	Tc05_g018030	0	F:oxidoreductase activity; P:cellular protein modification process; C:cellular_component; F:kinase activity	.
Tc02_g027870	1.62e-38	C:nucleus	.	Tc02_g011790	0	F:hydrolase activity, acting on ester bonds; P:metabolic process	.	Tc08_g008300	0	P:cellular protein modification process; F:kinase activity	.	Tc05_g018060	0	C:nuclear envelope; P:nucleocytoplasmic transport; P:protein targeting; P:protein complex assembly; F:structural molecule activity; C:protein complex	.
Tc02_g027880	2.29e-126	F:molecular_function	.	Tc02_g011850	0	C:cellular_component	.	Tc08_g008380	0	F:oxidoreductase activity	.	Tc05_g018100	0	F:DNA binding	.
Tc02_g028080	0	P:embryo development; P:reproduction	.	Tc02_g012010	1.7e-84	F:organic cyclic compound binding; F:heterocyclic compound binding; F:oxidoreductase activity; P:cellular metabolic process; P:single-organism metabolic process; P:response to stimulus	.	Tc08_g008510	0	P:catabolic process; F:ion binding; C:cellular_component	.	Tc05_g018150	0	F:oxidoreductase activity; P:cellular protein modification process; C:cellular_component; F:kinase activity	.
Tc02_g028120	3.48e-140	C:cellular_component	.	Tc02_g012250	0	F:oxidoreductase activity; P:protein complex assembly; C:cytoplasmic vesicle; C:cytoplasmic, membrane-bounded vesicle; F:lipid binding	.	Tc08_g008620	1.32e-153	C:nucleus; F:DNA binding; F:nucleic acid binding transcription factor activity; P:cellular nitrogen compound metabolic process; P:biosynthetic process	.	Tc05_g018190	3.04e-147	C:cellular_component	.
Tc02_g028210	6.4e-116	C:integral component of membrane	.	Tc02_g012340	0	F:DNA binding; P:cellular protein modification process; F:kinase activity; C:plasma membrane	.	Tc08_g008710	0	F:oxidoreductase activity; F:ion binding	.	Tc05_g018300	0	F:transferase activity, transferring glycosyl groups; F:ion binding; F:lipid binding; C:plasma membrane	.
Tc02_g028550	0	F:nuclease activity	.	Tc02_g012380	1.2e-56	F:zinc ion binding	.	Tc08_g009250	0	F:DNA binding	.	Tc05_g018350	0	F:iron ion binding; P:secondary metabolite biosynthetic process; C:integral component of membrane; F:oxidoreductase activity, acting on paired donors, with incorporation or reduction of molecular oxygen, NAD(P)H as one donor, and incorporation of one atom of oxygen; P:oxidation-reduction process; F:heme binding	.
Tc02_g029090	0	F:oxidoreductase activity; P:catabolic process; F:ion binding; C:extracellular region; P:Response to stress	.	Tc02_g012400	0	F:transmembrane transporter activity; C:cellular_component	.	Tc08_g009340	0	P:xylan catabolic process; F:xylan 1,4-beta-xylosidase activity; F:alpha-L-arabinofuranosidase activity; P:arabinan catabolic process; F:beta-glucosidase activity; C:plant-type cell wall	.	Tc05_g018430	0	F:ion binding	.
Tc02_g029110	0	F:oxidoreductase activity; P:catabolic process; F:ion binding; C:extracellular region; P:Response to stress	.	Tc02_g012470	0	C:cellular_component; P:transport	.	Tc08_g009350	0	P:carbohydrate metabolic process; F:hydrolase activity, acting on glycosyl bonds	.	Tc05_g018702	8.61e-162	P:DNA metabolic process; C:cellular_component; F:molecular_function	.
Tc02_g029120	0	F:oxidoreductase activity; P:catabolic process; F:ion binding; C:extracellular region; P:Response to stress	.	Tc02_g012480	0	C:nucleus; C:cytoplasm; P:signal transduction; F:ion binding; P:cellular protein modification process; F:kinase activity; C:plasma membrane	.	Tc08_g009580	0	F:aspartic-type endopeptidase activity; P:protein catabolic process; P:proteolysis; C:intrinsic component of membrane	.	Tc05_g019220	7.39e-163	F:transferase activity, transferring glycosyl groups	.
Tc02_g029550	0	P:cellular protein modification process; C:cellular_component; F:kinase activity	.	Tc02_g012590	7.96e-142	F:kinase activity	.	Tc08_g009970	2.37e-91	F:ion binding	.	Tc05_g019680	0	P:carbohydrate metabolic process; P:catabolic process; F:hydrolase activity, acting on glycosyl bonds	.
Tc02_g029780	0	P:embryo development; P:Cell differentiation	.	Tc02_g012630	0	P:signal transduction; F:molecular_function	.	Tc08_g010200	0	F:transmembrane transporter activity; C:plasma membrane	.	Tc05_g019750	0	F:DNA binding; F:RNA binding; F:nuclease activity; P:DNA metabolic process; P:symbiosis, encompassing mutualism through parasitism; P:Response to stress; P:immune system process	.
Tc02_g029870	0	F:ubiquitin-protein transferase activity; P:protein ubiquitination	.	Tc02_g012640	0	C:endoplasmic reticulum membrane; F:NADP binding; C:integral component of membrane; P:coenzyme A metabolic process; P:oxidation-reduction process; F:hydroxymethylglutaryl-CoA reductase (NADPH) activity; P:triterpenoid biosynthetic process; P:sterol biosynthetic process	.	Tc08_g010830	0	C:nucleus; C:integral component of membrane	.	Tc05_g019800	0	F:molecular_function	.
Tc02_g029900	0	F:oxidoreductase activity; P:clathrin coat assembly; F:clathrin binding; C:clathrin-coated vesicle; F:1-phosphatidylinositol binding	.	Tc02_g012720	0	F:ATP binding; C:integral component of membrane; F:protein kinase activity; F:carbohydrate binding; P:protein phosphorylation	.	Tc08_g012320	7.11e-81	C:plasma membrane; F:molecular_function	.	Tc05_g021100	0	C:nucleus; F:nuclease activity; P:DNA metabolic process	.
Tc02_g029920	0	P:cellular protein modification process; F:kinase activity; C:plasma membrane; P:reproduction	.	Tc02_g012900	0	P:microtubule severing; C:katanin complex; C:microtubule; F:microtubule binding	.	Tc08_g012410	0	C:cellular_component; F:kinase activity	.	Tc05_g021340	0	F:transferase activity, transferring acyl groups	.
Tc02_g030030	0	C:nucleus; F:DNA binding; F:nucleic acid binding transcription factor activity; P:cellular nitrogen compound metabolic process; P:biosynthetic process	.	Tc02_g012980	0	P:small molecule metabolic process; P:carbohydrate metabolic process; P:generation of precursor metabolites and energy; P:catabolic process; P:cofactor metabolic process; F:ion binding; P:cellular nitrogen compound metabolic process; F:kinase activity	.	Tc08_g012450	0	F:DNA binding	.	Tc05_g021440	0	C:cellular_component	.
Tc02_g030270	0	P:small molecule metabolic process; F:oxidoreductase activity; F:lyase activity; P:cellular protein modification process; P:biosynthetic process; P:cellular nitrogen compound metabolic process; C:cellular_component; F:signal transducer activity; F:kinase activity; P:Response to stress; P:immune system process	.	Tc02_g013330	0	C:cellular_component; F:molecular_function	.	Tc08_g012610	0	F:transmembrane transporter activity; P:signal transduction; P:homeostatic process; P:anatomical structure development; P:Cell differentiation; C:endoplasmic reticulum; P:developmental maturation; C:plasma membrane; P:growth	.	Tc05_g021821	7.2e-20	F:RNA-directed DNA polymerase activity; C:membrane; C:integral component of membrane; P:RNA-dependent DNA biosynthetic process	.
Tc02_g030460	0	P:glyoxylate cycle; F:metal ion binding; P:tricarboxylic acid cycle; F:isocitrate lyase activity; F:transferase activity, transferring acyl groups, acyl groups converted into alkyl on transfer; C:glyoxysome	.	Tc02_g013740	0	C:integral component of membrane	.	Tc08_g012740	0	F:ion binding; P:photosynthesis; C:protein complex; C:plastid; C:thylakoid	.	Tc05_g021910	2.2e-86	C:cellular_component	.
Tc02_g030910	0	P:small molecule metabolic process; P:sulfur compound metabolic process; F:lyase activity; C:cytosol; P:cellular nitrogen compound metabolic process; P:biosynthetic process	.	Tc02_g013750	0	C:cellular_component	.	Tc08_g013270	0	F:transmembrane transporter activity; C:plasma membrane	.	Tc05_g022220	0	P:small molecule metabolic process; P:cellular nitrogen compound metabolic process; F:molecular_function	.
Tc02_g031050	2.72e-168	F:RNA binding; F:nuclease activity	.	Tc02_g013880	1.86e-131	F:molecular_function	.	Tc08_g013830	0	P:catabolic process; P:lipid metabolic process; P:cellular nitrogen compound metabolic process; C:cellular_component; F:hydrolase activity, acting on glycosyl bonds	.	Tc05_g022310	0	C:Golgi apparatus; F:molecular_function	.
Tc02_g031490	0	F:oxidoreductase activity; F:ion binding; C:cellular_component	.	Tc02_g013910	0	C:cellular_component	.	Tc08_g014390	6.99e-142	P:embryo development; C:nucleus; P:membrane organization; F:RNA binding; F:structural constituent of ribosome; C:mitochondrion; C:ribosome; C:plastid; P:reproduction; P:translation	.	Tc05_g022660	0	P:transmembrane transport; C:cellular_component	.
Tc02_g031570	0	P:cellular protein modification process; C:cellular_component; F:kinase activity	.	Tc02_g014550	6.6e-49	F:calcium ion binding	.	Tc08_g014940	0	F:oxidoreductase activity; C:cellular_component	.	Tc05_g022770	2.8e-113	F:serine-type endopeptidase inhibitor activity; P:proteolysis; P:response to wounding; P:negative regulation of endopeptidase activity; F:peptidase activity	.
Tc02_g031790	4.45e-73	F:ion binding; C:plastid	.	Tc02_g014690	4.1e-170	F:DNA binding	.	Tc08_g015170	0	C:cellular_component; P:transport; F:molecular_function	.	Tc05_g022910	0	F:kinase activity; C:plastid	.
Tc02_g031810	0	C:cellular_component; P:transport; F:molecular_function	.	Tc02_g014841	0	F:nucleic acid binding; P:RNA phosphodiester bond hydrolysis, endonucleolytic; F:RNA-DNA hybrid ribonuclease activity; F:RNA-directed DNA polymerase activity; F:calcium ion binding; C:integral component of membrane; P:DNA integration; P:RNA-dependent DNA biosynthetic process; F:calcium-dependent phospholipid binding	.	Tc08_g015220	0	C:cellular_component; P:transport; F:molecular_function	.	Tc05_g022920	3.31e-58	C:nucleus	.
Tc02_g031840	0	C:cellular_component; P:transport; F:molecular_function	.	Tc02_g014980	0	P:signal transduction; F:kinase activity	.	Tc08_g015310	0	F:molecular_function	.	Tc05_g023100	0	C:plasma membrane; F:molecular_function; P:Response to stress	.
Tc02_g031930	0	F:molecular_function	.	Tc02_g014991	1.97e-62	F:molecular_function	.	Tc08_g015690	7.16e-57	C:nucleus; F:DNA binding; F:oxidoreductase activity; F:nucleic acid binding transcription factor activity; P:anatomical structure development; P:cellular nitrogen compound metabolic process; P:biosynthetic process; P:reproduction	.	Tc05_g023190	0	P:drug transmembrane transport; F:antiporter activity; C:integral component of membrane; F:drug transmembrane transporter activity	.
Tc02_g031990	0	P:lipid metabolic process; F:glycerophosphodiester phosphodiesterase activity; C:vacuole	.	Tc02_g015230	0	C:cellular_component	.	Tc08_g016010	0	C:nucleus; F:transcription factor activity, sequence-specific DNA binding; P:transcription, DNA-templated; P:regulation of transcription, DNA-templated; F:sequence-specific DNA binding	.	Tc05_g023350	0	F:ATP binding; F:ATPase activity, coupled to transmembrane movement of substances; P:transmembrane transport; P:metabolic process; C:integral component of membrane	.
Tc02_g032200	1.1e-117	C:integral component of membrane	.	Tc02_g015360	0	P:cellular protein modification process; F:kinase activity	.	Tc08_g016080	0	P:anatomical structure development	.	Tc05_g023440	0	F:lyase activity; F:ion binding; P:cellular amino acid metabolic process; P:photosynthesis; P:biosynthetic process; C:plastid; C:thylakoid	.
Tc02_g032420	0	P:carbohydrate metabolic process; C:cellular_component; F:hydrolase activity, acting on glycosyl bonds	.	Tc02_g015550	2.3e-89	C:integral component of membrane; C:plasma membrane	.	Tc09_g000710	8.65e-41	F:aminoacyl-tRNA ligase activity	.	Tc05_g023650	0	F:oxidoreductase activity; P:cellular protein modification process; C:cellular_component; F:kinase activity	.
Tc02_g032550	0	F:transferase activity, transferring glycosyl groups; P:metabolic process	.	Tc02_g015610	3.73e-178	P:catabolic process; F:ion binding; P:cellular protein modification process; C:endoplasmic reticulum; P:transport; F:ligase activity	.	Tc09_g000940	0	F:transmembrane transporter activity; C:cellular_component; F:signal transducer activity	.	Tc05_g023760	0	C:cytoplasm; F:oxidoreductase activity; P:lipid metabolic process	.
Tc02_g032560	0	F:transferase activity, transferring glycosyl groups	.	Tc02_g015660	3.5e-53	P:proteolysis; F:cysteine-type peptidase activity	.	Tc09_g001260	0	P:protein targeting; F:oxidoreductase activity; F:ion binding; C:plastid	.	Tc05_g024210	0	P:carbohydrate metabolic process; F:transferase activity, transferring glycosyl groups; C:cytoplasm; F:translation factor activity, RNA binding; P:cell wall organization or biogenesis	.
Tc02_g032700	0	C:integral component of membrane	.	Tc02_g015720	1.7e-88	F:nucleic acid binding; F:zinc ion binding	.	Tc09_g001400	2.9e-100	F:electron carrier activity; C:integral component of membrane; C:anchored component of plasma membrane	.	Tc05_g024220	0	P:carbohydrate metabolic process; F:transferase activity, transferring glycosyl groups; C:cytoplasm; F:translation factor activity, RNA binding; P:cell wall organization or biogenesis	.
Tc02_g032860	0	C:trans-Golgi network; C:integral component of membrane; C:plasma membrane	.	Tc02_g015790	0	F:transmembrane transporter activity; C:plasma membrane	.	Tc09_g001480	0	F:DNA binding; F:nucleotidyltransferase activity; C:protein complex; P:cellular nitrogen compound metabolic process; P:biosynthetic process; C:nucleolus	.	Tc05_g025080	0	F:SNAP receptor activity; F:SNARE binding; P:intracellular protein transport; C:cell plate; P:exocytosis; C:plasma membrane; C:phragmoplast; C:plasmodesma; P:vesicle fusion; P:vesicle docking; C:integral component of membrane; C:endomembrane system; C:SNARE complex;	.
Tc02_g032870	0	C:trans-Golgi network; F:inositol monophosphate 1-phosphatase activity; C:integral component of membrane; P:dephosphorylation; C:plasma membrane; F:inositol monophosphate 3-phosphatase activity; F:inositol monophosphate 4-phosphatase activity	.	Tc02_g015970	0	C:cellular_component	.	Tc09_g001860	0	C:plasmodesma; C:integral component of membrane; C:plasma membrane	.	Tc05_g025240	4.17e-154	F:DNA binding	.
[truncated: 2,061 more rows]

## Sheet: Sheet D
Supporting Excel file S1, Sheet D: Fisher’s Exact Test in the blast2go suite between the induced and repressed sets of differentially expressed genes.
GO-ID	Term	Category	FDR	P-Value	#Test	#Ref	#notAnnotTest	#notAnnotRef	Over/Under	TestSeqs	RefSeqs
Set 1 (Induced in Pmeg compared to control) Vs Set 2 (Induced in Ppal compared to control)
-	-	-	-	-	-	-	-	-	-	-	-
Set 3 (Repressed in Pmeg compared to control) Vs Set 4 (Repressed in Ppal compared to control)
-	-	-	-	-	-	-	-	-	-	-	-
[truncated: 140 more rows]

## Sheet: Sheet E
Supporting Excel file S1, Sheet D: KEGG (Kyoto Encyclopedia of Genes and Genomes) pathway analysis of the highly expressed genes based on SOM analysis (SOM class 1, 2, 3, 7, 8, 13, 14 and 19; see Figure 4)
[truncated: 282 more rows]

[truncated: 4 more sheets: Sheet F, Sheet G, Sheet H, Sheet I]
